# Supplementary material for: Pd-catalyzed oxidative C–H alkenylation for synthesizing arylvinyltriazole nucleosides
Source: Royal Society of Chemistry journal article supplement (doi:10.1039/c4ob01836b), 2014-09-30

## Supporting information

### Pd-Catalyzed Oxidative C-H Alkenylation for Synthesizing Arylvinyltriazole Nucleosides

Jingjie Tang,<sup>[a]</sup> Mei Cong,<sup>[a]</sup> Yi Xia,<sup>[a,b]</sup> Gilles Quéver,<sup>[a]</sup> Yuting Fan,<sup>[a,c]</sup> Fanqi Qu,<sup>[c]</sup>  
Ling Peng<sup>\*[a]</sup>

[a] Aix-Marseille Université CNRS, CINaM UMR 7325, 13288, Marseille, Cedex 9, France

[b] The Vancouver Prostate Centre and Department of Urologic Sciences, University of British Columbia, 2660 Oak street, Vancouver, BC V6H 3Z6, Canada

[c] College of Chemistry and Molecular Sciences, Wuhan University, 430072, Wuhan, P. R. China

*E-mail: ling.peng@univ-amu.fr*

### Table of Contents

|                                                     |     |
|-----------------------------------------------------|-----|
| Table S1 .....                                      | S2  |
| General.....                                        | S4  |
| Procedure for Synthesis .....                       | S5  |
| References.....                                     | S5  |
| Characterization of Products.....                   | S6  |
| <sup>1</sup> H and <sup>13</sup> CNMR Spectra. .... | S25 |

**Table S1:** Selection of Representative Conditions Tried for the Heck reaction of Triazole Nucleoside (**5**) with Styrene

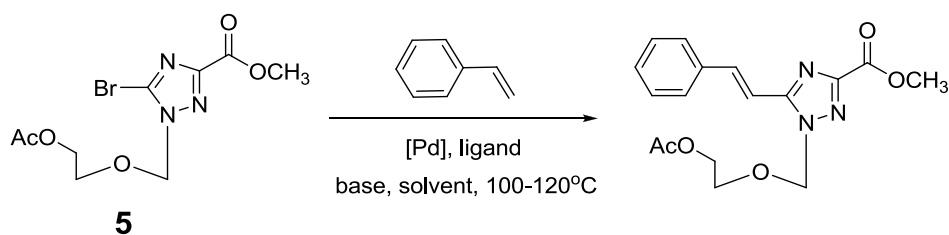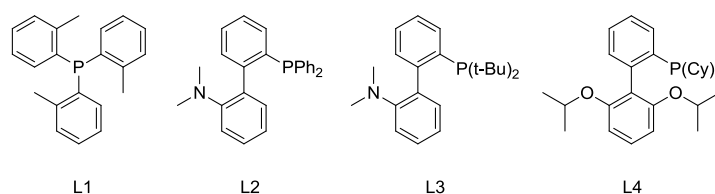

| Entry | [Pd]                 | Ligand                 | Base                                     | Solvent                        | Heating mode | Yield |
|-------|----------------------|------------------------|------------------------------------------|--------------------------------|--------------|-------|
| 1     | Pd(OAc) <sub>2</sub> | PPh <sub>3</sub>       | K <sub>2</sub> CO <sub>3</sub>           | DMF                            | Oil-bath     | 0     |
| 2     | Pd(OAc) <sub>2</sub> | Xantphos               | K <sub>2</sub> CO <sub>3</sub>           | CH <sub>3</sub> CN             | Oil-bath     | 0     |
| 3     | Pd(OAc) <sub>2</sub> | BINAP                  | Et <sub>3</sub> N                        | CH <sub>3</sub> CN             | Oil-bath     | 0     |
| 4     | Pd(OAc) <sub>2</sub> | Synphos                | Et <sub>3</sub> N                        | DMF                            | Oil-bath     | 0     |
| 5     | Pd(OAc) <sub>2</sub> | L1                     | Et <sub>3</sub> N                        | DMF                            | Oil-bath     | 0     |
| 6     | Pd(OAc) <sub>2</sub> | L2                     | K <sub>2</sub> CO <sub>3</sub>           | Toluene                        | Microwave    | 0     |
| 7     | Pd(OAc) <sub>2</sub> | L3                     | K <sub>2</sub> CO <sub>3</sub>           | Toluene                        | Microwave    | 0     |
| 8     | Pd(OAc) <sub>2</sub> | L4                     | K <sub>2</sub> CO <sub>3</sub>           | Toluene                        | Microwave    | 0     |
| 9     | Pd(OAc) <sub>2</sub> | dppe                   | Et <sub>3</sub> N                        | DMF                            | Microwave    | 0     |
| 10    | Pd(OAc) <sub>2</sub> | Xantphos:<br>BINAP=3:1 | Et <sub>3</sub> N                        | THF:<br>CH <sub>3</sub> CN=1:1 | Microwave    | 0     |
| 11    | Pd(OAc) <sub>2</sub> | -                      | K <sub>2</sub> CO <sub>3</sub> +<br>TBAB | DMA                            | Microwave    | 0     |
| 12    | Pd(OAc) <sub>2</sub> | Xphos                  | Et <sub>3</sub> N                        | Toluene                        | Microwave    | 0     |

|    |                                    |                  |                                          |                          |           |   |
|----|------------------------------------|------------------|------------------------------------------|--------------------------|-----------|---|
| 13 | Pd(OAc) <sub>2</sub>               | Xphos            | Et <sub>3</sub> N                        | DMF                      | Microwave | 0 |
| 14 | Pd(OAc) <sub>2</sub>               | Xphos            | Et <sub>3</sub> N                        | CH <sub>3</sub> OH       | Microwave | 0 |
| 16 | Pd(OAc) <sub>2</sub>               | Xphos            | Et <sub>3</sub> N                        | CH <sub>3</sub> CN       | Microwave | 0 |
| 17 | Pd(OAc) <sub>2</sub>               | Xphos            | Et <sub>3</sub> N                        | DMF/H <sub>2</sub> O     | Microwave | 0 |
| 18 | Pd(OAc) <sub>2</sub>               | L1               | K <sub>2</sub> CO <sub>3</sub>           | Toluene                  | Microwave | 0 |
| 19 | Pd(OAc) <sub>2</sub>               | L1               | K <sub>2</sub> CO <sub>3</sub>           | DMF                      | Microwave | 0 |
| 20 | Pd(OAc) <sub>2</sub>               | L1               | K <sub>2</sub> CO <sub>3</sub>           | Dioxane                  | Microwave | 0 |
| 21 | Pd(OAc) <sub>2</sub>               | PPh <sub>3</sub> | K <sub>2</sub> CO <sub>3</sub>           | DMF                      | Microwave | 0 |
| 22 | Pd(OAc) <sub>2</sub>               | PPh <sub>3</sub> | K <sub>2</sub> CO <sub>3</sub> +<br>TBAB | DMF                      | Microwave | 0 |
| 23 | Pd(OAc) <sub>2</sub>               | BINAP            | Et <sub>3</sub> N                        | THF                      | Microwave | 0 |
| 24 | Pd(OAc) <sub>2</sub>               | BINAP            | K <sub>2</sub> CO <sub>3</sub>           | Toluene                  | Microwave | 0 |
| 25 | Pd(PPh <sub>3</sub> ) <sub>4</sub> | -                | Et <sub>3</sub> N                        | DMF                      | Oil-bath  | 0 |
| 26 | Pd(PPh <sub>3</sub> ) <sub>4</sub> | -                | Et <sub>3</sub> N                        | DMF                      | Microwave | 0 |
| 27 | Pd(PPh <sub>3</sub> ) <sub>4</sub> | -                | Li <sub>2</sub> CO <sub>3</sub>          | Dioxane/H <sub>2</sub> O | Microwave | 0 |

**General:** All the reactions were carried out using Schlenk tubes. All the chemicals were purchased from Sigma Aldrich or Alfa aesar and used directly without any purification. Triazole nucleosides **1-4**,<sup>1,2</sup> methyl 4-vinylbenzoate,<sup>3</sup> *N*-propyl-4-vinylbenzamide,<sup>4</sup> 1-(benzyloxy)-4-vinylbenzene<sup>5</sup> and 4-nitrostyrene<sup>6</sup> were synthesized following the reported procedures. All the solvents used in the reactions were dried according to described methods and distilled before use except DMF. All the products were purified by flash chromatography on silica gel (Merck 200-300 mesh). <sup>1</sup>H NMR spectra were recorded at 250, 300 or 400 MHz and <sup>13</sup>C NMR spectra recorded at 62.5 or 100 MHz on Bruker Avance II 250, Bruker Avance III 300, Bruker Avance III 400 or JEOL ECS 400 spectrometers. Chemical shifts ( $\delta$ ) are expressed in parts per million (ppm) with the residual peak of CHCl<sub>3</sub> at 7.26 ppm or TMS at 0.00 as internal reference. The high resolution mass spectra (HRMS) were obtained with an electrospray ionization (ESI) using mass spectrometer QStar Elite (Applied Biosystems SCIEX). The exact mass measurement was done in triplicate with a double internal calibration. Analytical thin layer chromatographies (TLC) were performed using silica gel 60 F254 plates 0.2 mm thick with UV light (254 and 364 nm) as revelator.

**General Procedure of Synthesis.** Triazole **1-4** (0.20 mmol), alkene (0.80-2.0 mmol), Pd(OAc)<sub>2</sub> (0.040 mmol), AgOAc (0.80 mmol), PivOH (0.60 mmol) and AcOH (3.0 mL) were refluxed at 130 °C for 20 hours under air atmosphere. The solvent was then removed under reduced pressure and the crude residue was purified by flash chromatography on silica gel (eluent: Cyclohexane/EtOAc or CH<sub>2</sub>Cl<sub>2</sub>/CH<sub>3</sub>OH) affording the desired products.

## References

- (1) R. Zhu, F. Qu, G. Qu d éver and L. Peng, *Tetrahedron Lett.*, 2007, **48**, 2389.
- (2) J. Wan, Y. Xia, Y. Liu, M. Wang, P. Rocchi, J. Yao, F. Qu, J. Neyts, J. L. Iovanna and L. Peng, *J. Med. Chem.*, 2009, **52**, 1144.
- (3) M. Schedler, D.-S. Wang and F. Glorius, *Angew. Chem. Int. Ed.*, 2013, **52**, 2585.
- (4) G. Quelever, P. Kachidian, C. Melon, C. Garino, Y. Laras, N. Pietrancosta, M. Sheha and J. Louis Kraus, *Org. Biomol. Chem.*, 2005, **3**, 2450.
- (5) Z.-H. Shan, J. Liu, L.-M. Xu, Y.-F. Tang, J.-H. Chen and Z. Yang, *Org. Lett.*, 2012, **14**, 3712.
- (6) B. Schmidt and R. Berger, *Adv. Synth. Catal.*, 2013, **355**, 463.

## Characterization of Products

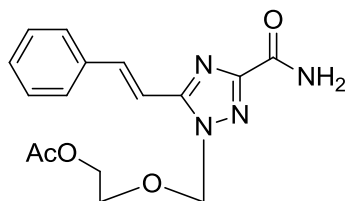

**1a:** The desired product was obtained using the general procedure starting from triazole **1** and styrene with a 72% yield (47.6 mg) as a white solid. A total of 46.2 mg (70%) of product was obtained starting from triazole **3** and styrene following the same procedure.  $^1\text{H}$  NMR (250 MHz,  $\text{CDCl}_3$ ):  $\delta$  7.86 (d, 1H,  $J_{\text{trans}} = 16.0$  Hz, CH-vinyl), 7.60-7.56 (m, 2H, -ArH), 7.44-7.39 (m, 3H, -ArH), 7.07-7.00 (m, 2H, CH-vinyl + -C(O)NH), 6.09 (br s, 1H, -C(O)NH), 5.68 (s, 2H, -NCH<sub>2</sub>O-), 4.20 (t, 2H,  $J = 4.6$  Hz, -CH<sub>2</sub>CH<sub>2</sub>OAc), 3.81 (t, 2H,  $J = 4.6$  Hz, -CH<sub>2</sub>CH<sub>2</sub>OAc), 1.99 (s, 3H, -C(O)CH<sub>3</sub>);  $^{13}\text{C}$  NMR (62.5 MHz,  $\text{CDCl}_3$ ):  $\delta$  170.7, 161.3, 155.4, 155.0, 139.8, 135.0, 129.9, 129.0, 127.6, 110.2, 78.0, 67.6, 62.6, 20.7; HRMS: calcd. for  $\text{C}_{16}\text{H}_{19}\text{N}_4\text{O}_4^+$  331.1401, found 331.1399.

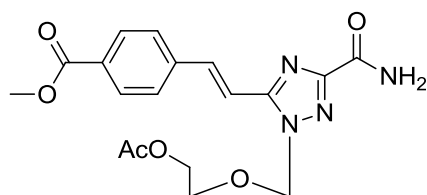

**1b:** The desired product was obtained using the general procedure starting from triazole **1** and methyl 4-vinylbenzoate with a 70% yield (54.4 mg) as a white solid.  $^1\text{H}$  NMR (400 MHz,  $\text{CDCl}_3$ ):  $\delta$  8.07 (d, 2H,  $J = 8.4$  Hz, -ArH), 7.89 (d, 1H,  $J_{\text{trans}} = 16.0$  Hz, CH-vinyl), 7.64 (d, 2H,  $J = 8.0$  Hz, -ArH), 7.13 (d, 1H,  $J_{\text{trans}} = 16.0$  Hz, CH-vinyl), 7.07 (br s, 1H, -C(O)NH), 6.18 (br s, 1H, -C(O)NH), 5.71 (s, 2H,

-NCH<sub>2</sub>O-), 4.20 (t, 2H,  $J = 4.6$  Hz, -CH<sub>2</sub>CH<sub>2</sub>OAc), 3.93 (s, 3H, -OCH<sub>3</sub>), 3.81 (t, 2H,  $J = 4.6$  Hz, -CH<sub>2</sub>CH<sub>2</sub>OAc), 1.99 (s, 3H, -C(O)CH<sub>3</sub>); <sup>13</sup>C NMR (100 MHz, CDCl<sub>3</sub>):  $\delta$  170.7, 166.5, 160.9, 155.4, 154.5, 139.2, 138.4, 131.0, 130.2, 127.5, 112.4, 78.1, 67.7, 62.6, 52.3, 20.8; HRMS: calcd. for C<sub>18</sub>H<sub>21</sub>N<sub>4</sub>O<sub>6</sub><sup>+</sup> 389.1456, found 389.1457.

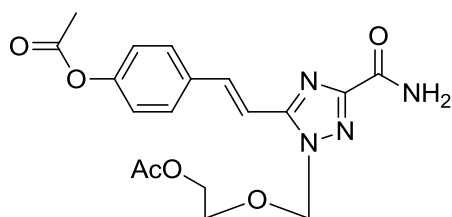

**1c:** The desired product was obtained using the general procedure starting from triazole **1** and 4-acetoxystyrene with a 60% yield (46.6 mg) as a yellow solid. <sup>1</sup>H NMR (250 MHz, CDCl<sub>3</sub>):  $\delta$  7.85 (d, 1H,  $J_{trans} = 16.0$  Hz, CH-vinyl), 7.59 (d, 2H,  $J = 8.8$  Hz, -ArH), 7.15 (d, 2H,  $J = 8.8$  Hz, -ArH), 7.05 (br s, 1H, -C(O)NH), 6.98 (d, 1H,  $J_{trans} = 16.0$  Hz, CH-vinyl), 5.99 (br s, 1H, -C(O)NH), 5.68 (s, 2H, -NCH<sub>2</sub>O-), 4.20 (t, 2H,  $J = 4.6$  Hz, -CH<sub>2</sub>CH<sub>2</sub>OAc), 3.81 (t, 2H,  $J = 4.6$  Hz, -CH<sub>2</sub>CH<sub>2</sub>OAc), 2.32 (s, 3H, -OC(O)CH<sub>3</sub>), 2.00 (s, 3H, -C(O)CH<sub>3</sub>); <sup>13</sup>C NMR (62.5 MHz, CDCl<sub>3</sub>):  $\delta$  170.7, 169.2, 161.3, 155.3, 154.9, 151.8, 138.7, 132.7, 128.7, 122.2, 110.3, 78.0, 67.7, 62.6, 21.1, 20.8; HRMS: calcd. for C<sub>18</sub>H<sub>21</sub>N<sub>4</sub>O<sub>6</sub><sup>+</sup> 389.1456, found 389.1457.

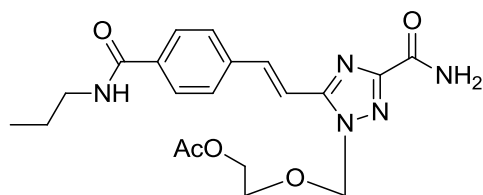

**1d:** The desired product was obtained using the general procedure starting from triazole **1** and *N*-propyl-4-vinylbenzamide with a 63% yield (52.3 mg) as a white solid.

$^1\text{H}$  NMR (400 MHz,  $\text{CDCl}_3$ ):  $\delta$  7.87 (d, 1H,  $J_{trans} = 16.4$  Hz, CH-vinyl), 7.80 (d, 2H,  $J = 8.4$  Hz, -ArH), 7.62 (d, 2H,  $J = 8.0$  Hz, -ArH), 7.10 (d, 1H,  $J_{trans} = 16.0$  Hz, CH-vinyl), 7.06 (br s, 1H, -C(O)NH), 6.25 (t, 1H,  $J = 5.6$  Hz, -C(O)NHCH<sub>2</sub>-), 6.11 (br s, 1H, -C(O)NH), 5.69 (s, 2H, -NCH<sub>2</sub>O-), 4.19 (t, 2H,  $J = 4.6$  Hz, -CH<sub>2</sub>CH<sub>2</sub>OAc), 3.81 (t, 2H,  $J = 4.6$  Hz, -CH<sub>2</sub>CH<sub>2</sub>OAc), 3.46-3.41 (m, 2H, -NHCH<sub>2</sub>-), 1.99 (s, 3H, -C(O)CH<sub>3</sub>), 1.70-1.61 (m, 2H, -NHCH<sub>2</sub>CH<sub>2</sub>-), 0.99 (t, 3H,  $J = 7.4$  Hz, -CH<sub>2</sub>CH<sub>3</sub>):  $\delta$  170.7, 166.7, 160.9, 155.3, 154.5, 138.5, 137.6, 135.7, 127.6, 127.5, 111.7, 78.0, 67.7, 62.5, 41.8, 22.9, 20.7, 11.4; HRMS: calcd. for  $\text{C}_{20}\text{H}_{26}\text{N}_5\text{O}_5^+$  416.1928, found 416.1929.

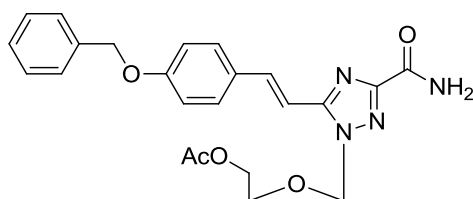

**1e:** The desired product was obtained using the general procedure starting from triazole **1** and 1-(benzyloxy)-4-vinylbenzene with a 52% yield (45.4 mg) as an orange solid.  $^1\text{H}$  NMR (400 MHz,  $\text{CDCl}_3$ ):  $\delta$  7.80 (d, 1H,  $J_{trans} = 16.0$  Hz, CH-vinyl), 7.52 (d, 2H,  $J = 8.4$  Hz, phenyl-H), 7.44-7.32 (m, 5H, phenyl-H), 7.08 (br s, 1H, -C(O)NH), 7.00 (d, 2H,  $J = 8.4$  Hz, phenyl-H), 6.88 (d, 1H,  $J_{trans} = 16.0$  Hz, CH-vinyl), 6.31-6.23 (m, 1H, -C(O)NH), 5.66 (s, 2H, -NCH<sub>2</sub>O-), 5.10 (s, 2H, PhCH<sub>2</sub>O-), 4.19 (t, 2H,  $J = 4.4$  Hz, -CH<sub>2</sub>CH<sub>2</sub>OAc), 3.80 (t, 2H,  $J = 4.4$  Hz, -CH<sub>2</sub>CH<sub>2</sub>OAc), 1.99 (s, 3H, -C(O)CH<sub>3</sub>);  $^{13}\text{C}$  NMR (100 MHz,  $\text{CDCl}_3$ ):  $\delta$  170.8, 161.2, 160.3, 155.4, 155.3, 139.4, 136.5, 129.2, 128.7, 128.2, 128.0, 127.5, 115.3, 107.8, 77.9, 70.1, 67.5, 62.7, 20.8; HRMS: calcd. for  $\text{C}_{23}\text{H}_{25}\text{N}_4\text{O}_5^+$  437.1819, found 437.1821.



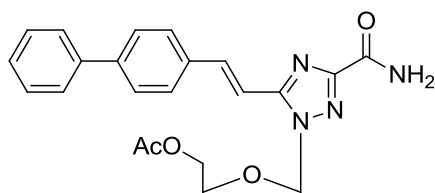

**1f:** The desired product was obtained using the general procedure starting from triazole **1** and 4-vinylbiphenyl with a 62% yield (50.4 mg) as a light yellow solid.  $^1\text{H}$  NMR (250 MHz,  $\text{CDCl}_3$ ):  $\delta$  7.92 (d, 1H,  $J_{\text{trans}} = 16.0$  Hz, CH-vinyl), 7.66-7.61 (m, 6H, phenyl-H), 7.50-7.35 (m, 3H, phenyl-H), 7.11-7.04 (m, 2H,  $J_{\text{trans}} = 15.8$  Hz, CH-vinyl + -C(O)NH), 5.84 (br s, 1H, -C(O)NH), 5.70 (s, 2H, -NCH<sub>2</sub>O-), 4.22 (t, 2H,  $J = 4.6$  Hz, -CH<sub>2</sub>CH<sub>2</sub>OAc), 3.83 (t, 2H,  $J = 4.6$  Hz, -CH<sub>2</sub>CH<sub>2</sub>OAc), 2.01 (s, 3H, -C(O)CH<sub>3</sub>);  $^{13}\text{C}$  NMR (62.5 MHz,  $\text{CDCl}_3$ ):  $\delta$  170.8, 161.3, 155.3, 155.1, 142.7, 140.1, 139.4, 134.0, 128.9, 128.1, 127.9, 127.6, 127.0, 110.0, 78.0, 67.6, 62.6, 20.8; HRMS: calcd. for  $\text{C}_{22}\text{H}_{23}\text{N}_4\text{O}_4^+$  407.1714, found 407.1713.

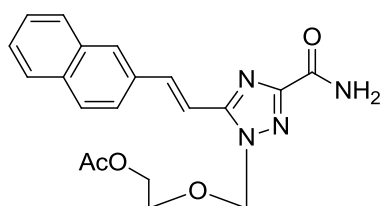

**1g:** The desired product was obtained using the general procedure starting from triazole **1** and 2-vinylnaphthalene with a 62% yield (47.2 mg) as a light yellow solid.  $^1\text{H}$  NMR (300 MHz,  $\text{CDCl}_3$ ):  $\delta$  8.04 (d, 1H,  $J_{\text{trans}} = 16.2$  Hz, CH-vinyl), 7.97 (s, 1H, phenyl-H), 7.89-7.83 (m, 3H, phenyl-H), 7.76-7.73 (m, 1H, phenyl-H), 7.54-7.51 (m, 2H, phenyl-H), 7.15 (d, 1H,  $J_{\text{trans}} = 15.9$  Hz, CH-vinyl), 7.09 (br s, 1H, -C(O)NH), 5.87 (br s, 1H, -C(O)NH), 5.73 (s, 2H, -NCH<sub>2</sub>O-), 4.22 (t, 2H,  $J = 4.7$  Hz,

-CH<sub>2</sub>CH<sub>2</sub>OAc), 3.84 (t, 2H, *J* = 4.7 Hz, -CH<sub>2</sub>CH<sub>2</sub>OAc), 2.00 (s, 3H, -C(O)CH<sub>3</sub>); <sup>13</sup>C NMR (100 MHz, CDCl<sub>3</sub>): δ 170.8, 161.3, 155.4, 155.1, 139.9, 134.0, 133.4, 132.4, 129.3, 128.8, 128.5, 127.8, 127.2, 126.8, 123.2, 110.2, 78.0, 67.7, 62.7, 20.8; HRMS: calcd. for C<sub>20</sub>H<sub>21</sub>N<sub>4</sub>O<sub>4</sub><sup>+</sup> 381.1557, found 381.1555.

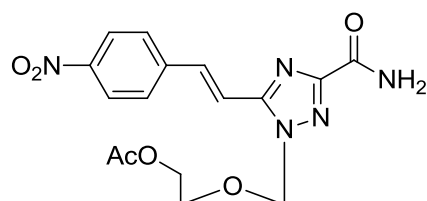

**1h:** The desired product was obtained using the general procedure starting from triazole **1** and 4-nitrostyrene with a 61% yield (45.8 mg) as a light yellow solid. <sup>1</sup>H NMR (400 MHz, DMSO-*d*<sub>6</sub>): δ 8.30 (d, 2H, *J* = 8.4 Hz, -ArH), 8.06 (d, 2H, *J* = 8.8 Hz, -ArH), 7.89 (br s, 1H, -C(O)NH), 7.84 (d, 1H, *J*<sub>trans</sub> = 16.0 Hz, CH-vinyl), 7.74-7.70 (m, 2H, CH-vinyl + -C(O)NH), 5.85 (s, 2H, -NCH<sub>2</sub>O-), 4.11-4.09 (m, 2H, -CH<sub>2</sub>CH<sub>2</sub>OAc), 3.78-3.76 (m, 2H, -CH<sub>2</sub>CH<sub>2</sub>OAc), 1.94 (s, 3H, -C(O)CH<sub>3</sub>); <sup>13</sup>C NMR (100 MHz, DMSO-*d*<sub>6</sub>): δ 170.2, 160.3, 156.4, 153.5, 147.4, 141.7, 135.1, 128.7, 124.0, 115.9, 76.9, 67.0, 62.7, 20.5; HRMS: calcd. for C<sub>16</sub>H<sub>18</sub>N<sub>5</sub>O<sub>6</sub><sup>+</sup> 376.1252, found 376.1253.

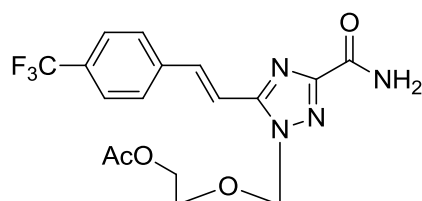

**1i:** The desired product was obtained using the general procedure starting from triazole **1** and 4-(trifluoromethyl)-styrene with a 57% yield (45.4 mg) as a white solid.

$^1\text{H}$  NMR (250 MHz,  $\text{CDCl}_3$ ):  $\delta$  7.90 (d, 1H,  $J_{trans} = 16.0$  Hz, CH-vinyl), 7.68 (s, 4H, -ArH), 7.13 (d, 1H,  $J_{trans} = 16.0$  Hz, CH-vinyl), 7.02 (br s, 1H, -C(O)NH), 5.82 (br s, 1H, -C(O)NH), 5.71 (s, 2H, -NCH<sub>2</sub>O-), 4.21 (t, 2H,  $J = 4.6$  Hz, -CH<sub>2</sub>CH<sub>2</sub>OAc), 3.82 (t, 2H,  $J = 4.6$  Hz, -CH<sub>2</sub>CH<sub>2</sub>OAc), 2.00 (s, 3H, -C(O)CH<sub>3</sub>);  $^{13}\text{C}$  NMR (62.5 MHz,  $\text{CDCl}_3$ ):  $\delta$  170.7, 161.1, 155.5, 154.4, 138.4, 138.0, 131.4 (q,  $J_{CF} = 32.5$  Hz), 127.8, 125.9 (d,  $J_{CF} = 3.8$  Hz), 123.8 (d,  $J_{CF} = 260.7$  Hz), 112.6, 78.1, 67.8, 62.6, 20.7; HRMS: calcd. for  $\text{C}_{17}\text{H}_{18}\text{F}_3\text{N}_4\text{O}_4^+$  399.1275, found 399.1275.

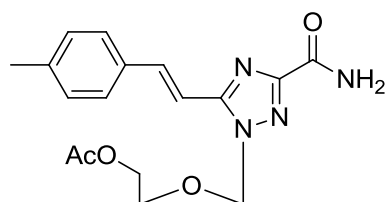

**1j:** The desired product was obtained using the general procedure starting from triazole **1** and 4-methylstyrene with a 68% yield (46.8 mg) as a light yellow solid. A total of 41.3 mg (60%) of product was obtained starting from triazole **3** and 4-methylstyrene following the same procedure.  $^1\text{H}$  NMR (250 MHz,  $\text{CDCl}_3$ ):  $\delta$  7.83 (d, 1H,  $J_{trans} = 16.0$  Hz, CH-vinyl), 7.47 (d, 2H,  $J = 7.8$  Hz, -ArH), 7.21 (d, 2H,  $J = 8.0$  Hz, -ArH), 7.06 (br s, 1H, -C(O)NH), 6.98 (d, 1H,  $J_{trans} = 16.0$  Hz, CH-vinyl), 6.07 (br s, 1H, -C(O)NH), 5.67 (s, 2H, -NCH<sub>2</sub>O-), 4.19 (t, 2H,  $J = 4.5$  Hz, -CH<sub>2</sub>CH<sub>2</sub>OAc), 3.80 (t, 2H,  $J = 4.4$  Hz, -CH<sub>2</sub>CH<sub>2</sub>OAc), 2.38 (s, 3H, -CH<sub>3</sub>), 1.99 (s, 3H, -C(O)CH<sub>3</sub>);  $^{13}\text{C}$  NMR (62.5 MHz,  $\text{CDCl}_3$ ):  $\delta$  170.7, 161.4, 155.4, 155.2, 140.2, 139.8, 132.3, 129.7, 127.6, 109.1, 77.9, 67.6, 62.6, 21.4, 20.7; HRMS: calcd. for  $\text{C}_{17}\text{H}_{21}\text{N}_4\text{O}_4^+$  345.1557, found 345.1556.

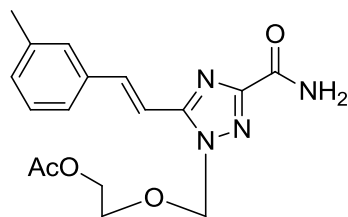

**1k:** The desired product was obtained using the general procedure starting from triazole **1** and 3-methylstyrene with a 67% yield (46.1 mg) as a white solid. A total of 46.8 mg (68%) of product was obtained starting from triazole **3** and 3-methylstyrene following the same procedure.  $^1\text{H}$  NMR (250 MHz,  $\text{CDCl}_3$ ):  $\delta$  7.84 (d, 1H,  $J_{trans} = 16.0$  Hz, CH-vinyl), 7.39-7.37 (m, 2H, -ArH), 7.32 (d, 1H,  $J = 7.3$  Hz, -ArH), 7.20 (d, 1H,  $J = 7.3$  Hz, -ArH), 7.05-6.98 (m, 2H, CH-vinyl + -C(O)NH), 5.82 (br s, 1H, -C(O)NH), 5.69 (s, 2H, -NCH<sub>2</sub>O-), 4.20 (t, 2H,  $J = 4.6$  Hz, -CH<sub>2</sub>CH<sub>2</sub>OAc), 3.82 (t, 2H,  $J = 4.6$  Hz, -CH<sub>2</sub>CH<sub>2</sub>OAc), 2.40 (s, 3H, -CH<sub>3</sub>), 2.00 (s, 3H, -C(O)CH<sub>3</sub>);  $^{13}\text{C}$  NMR (100 MHz,  $\text{CDCl}_3$ ):  $\delta$  170.9, 161.2, 155.4, 155.1, 140.2, 138.8, 135.0, 130.9, 129.0, 128.2, 125.0, 109.9, 78.0, 67.7, 62.7, 21.4, 20.9; HRMS: calcd. for  $\text{C}_{17}\text{H}_{21}\text{N}_4\text{O}_4^+$  345.1557, found 345.1556.

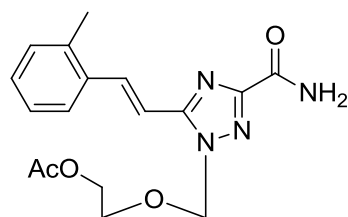

**1l:** The desired product was obtained using the general procedure starting from triazole **1** and 2-methylstyrene with a 67% yield (46.1 mg) as a white solid. A total of 41.3 mg (60%) of product was obtained starting from triazole **3** and 2-methylstyrene following the same procedure.  $^1\text{H}$  NMR (250 MHz,  $\text{CDCl}_3$ ):  $\delta$  8.11 (d, 1H,  $J_{trans} =$

15.8 Hz, CH-vinyl), 7.63-7.60 (m, 1H, -ArH), 7.32-7.21 (m, 3H, -ArH), 7.06 (br s, 1H, -C(O)NH), 6.96 (d, 1H,  $J_{trans}$  = 16.0 Hz, CH-vinyl), 5.90 (br s, 1H, -C(O)NH), 5.68 (s, 2H, -NCH<sub>2</sub>O-), 4.20 (t, 2H,  $J$  = 4.8 Hz, -CH<sub>2</sub>CH<sub>2</sub>OAc), 3.82 (t, 2H,  $J$  = 4.6 Hz, -CH<sub>2</sub>CH<sub>2</sub>OAc), 2.48 (s, 3H, -CH<sub>3</sub>), 2.00 (s, 3H, -C(O)CH<sub>3</sub>); <sup>13</sup>C NMR (62.5 MHz, CDCl<sub>3</sub>):  $\delta$  170.7, 161.5, 155.4, 155.1, 137.5, 137.4, 134.1, 130.9, 129.7, 126.4, 125.8, 111.4, 78.0, 67.6, 62.7, 20.7, 19.9; HRMS: calcd. for C<sub>17</sub>H<sub>21</sub>N<sub>4</sub>O<sub>4</sub><sup>+</sup> 345.1557, found 345.1556.

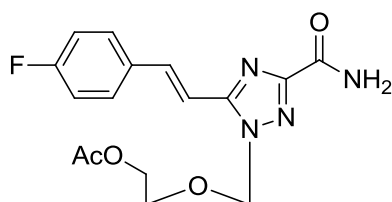

**1m:** The desired product was obtained using the general procedure starting from triazole **1** and 4-fluorostyrene with a 69% yield (48.1 mg) as a white solid. A total of 45.3 mg (65%) of product was obtained starting from triazole **3** and 4-fluorostyrene following the same procedure. <sup>1</sup>H NMR (250 MHz, CDCl<sub>3</sub>):  $\delta$  7.83 (d, 1H,  $J_{trans}$  = 16.0 Hz, CH-vinyl), 7.60-7.54 (m, 2H, -ArH), 7.11 (t, 2H,  $J$  = 8.6 Hz, -ArH), 7.03 (br s, 1H, -C(O)NH), 6.95 (d, 1H,  $J_{trans}$  = 16.0 Hz, CH-vinyl), 5.98 (br s, 1H, -C(O)NH), 5.68 (s, 2H, -NCH<sub>2</sub>O-), 4.20 (t, 2H,  $J$  = 4.6 Hz, -CH<sub>2</sub>CH<sub>2</sub>OAc), 3.81 (t, 2H,  $J$  = 4.6 Hz, -CH<sub>2</sub>CH<sub>2</sub>OAc), 2.00 (s, 3H, -C(O)CH<sub>3</sub>); <sup>13</sup>C NMR (62.5 MHz, CDCl<sub>3</sub>):  $\delta$  170.7, 163.6 (d,  $J_{CF}$  = 249.3 Hz), 161.4, 155.4, 154.9, 138.4, 131.3 (d,  $J_{CF}$  = 3.4 Hz), 129.4 (d,  $J_{CF}$  = 8.3 Hz), 116.1 (d,  $J_{CF}$  = 21.8 Hz), 110.0 (d,  $J_{CF}$  = 2.3 Hz), 77.9, 67.6, 62.6, 20.7; HRMS: calcd. for C<sub>16</sub>H<sub>18</sub>FN<sub>4</sub>O<sub>4</sub><sup>+</sup> 349.1307, found 349.1307.

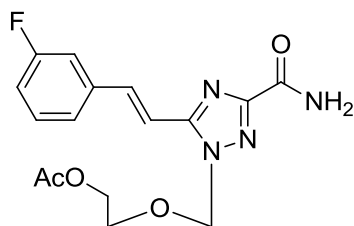

**1n:** The desired product was obtained using the general procedure starting from triazole **1** and 3-fluorostyrene with a 66% yield (46.0 mg) as a white solid.  $^1\text{H}$  NMR (250 MHz,  $\text{CDCl}_3$ ):  $\delta$  7.83 (d, 1H,  $J_{\text{trans}} = 16.0$  Hz, CH-vinyl), 7.43-7.30 (m, 3H, -ArH), 7.11-7.01 (m, 3H, -ArH + CH-vinyl + -C(O)NH), 5.89 (br s, 1H, -C(O)NH), 5.69 (s, 2H, -NCH<sub>2</sub>O-), 4.20 (t, 2H,  $J = 4.6$  Hz, -CH<sub>2</sub>CH<sub>2</sub>OAc), 3.81 (t, 2H,  $J = 4.6$  Hz, -CH<sub>2</sub>CH<sub>2</sub>OAc), 2.00 (s, 3H, -C(O)CH<sub>3</sub>);  $^{13}\text{C}$  NMR (62.5 MHz,  $\text{CDCl}_3$ ):  $\delta$  170.7, 163.1 (d,  $J_{\text{CF}} = 245.2$  Hz), 161.3, 155.5, 154.6, 138.6 (d,  $J_{\text{CF}} = 2.6$  Hz), 137.3 (d,  $J_{\text{CF}} = 7.7$  Hz), 130.5 (d,  $J_{\text{CF}} = 8.3$  Hz), 123.7 (d,  $J_{\text{CF}} = 2.8$  Hz), 116.7 (d,  $J_{\text{CF}} = 21.3$  Hz), 113.8 (d,  $J_{\text{CF}} = 21.9$  Hz), 111.5, 78.0, 67.7, 62.6, 20.7; HRMS: calcd. for  $\text{C}_{16}\text{H}_{18}\text{FN}_4\text{O}_4^+$  349.1307, found 349.1312.

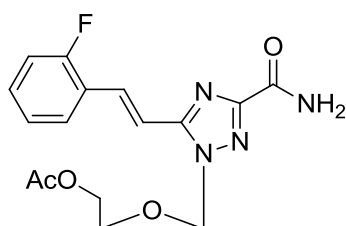

**1o:** The desired product was obtained using the general procedure starting from triazole **1** and 2-fluorostyrene with a 62% yield (43.2 mg) as a white solid.  $^1\text{H}$  NMR (250 MHz,  $\text{CDCl}_3$ ):  $\delta$  7.96 (d, 1H,  $J_{\text{trans}} = 16.0$  Hz, CH-vinyl), 7.62-7.56 (m, 1H, -ArH), 7.41-7.32 (m, 1H, -ArH), 7.23-7.07 (m, 4H, -ArH + CH-vinyl + -C(O)NH), 5.86 (br s, 1H, -C(O)NH), 5.69 (s, 2H, -NCH<sub>2</sub>O-), 4.20 (t, 2H,  $J = 4.5$  Hz,

-CH<sub>2</sub>CH<sub>2</sub>OAc), 3.82 (t, 2H, *J* = 4.6 Hz, -CH<sub>2</sub>CH<sub>2</sub>OAc), 2.01 (s, 3H, -C(O)CH<sub>3</sub>); <sup>13</sup>C NMR (62.5 MHz, CDCl<sub>3</sub>): δ 170.7, 161.2, 161.2 (d, *J*<sub>CF</sub> = 251.6 Hz), 155.5, 154.9, 132.7 (d, *J*<sub>CF</sub> = 1.8 Hz), 131.2 (d, *J*<sub>CF</sub> = 8.6 Hz), 129.0 (d, *J*<sub>CF</sub> = 2.9 Hz), 124.6 (d, *J*<sub>CF</sub> = 3.6 Hz), 123.1 (d, *J*<sub>CF</sub> = 11.5 Hz), 116.3 (d, *J*<sub>CF</sub> = 21.8 Hz), 112.9 (d, *J*<sub>CF</sub> = 8.0 Hz), 78.0, 67.6, 62.7, 20.7; HRMS: calcd. for C<sub>16</sub>H<sub>18</sub>FN<sub>4</sub>O<sub>4</sub><sup>+</sup> 349.1307, found 349.1308.

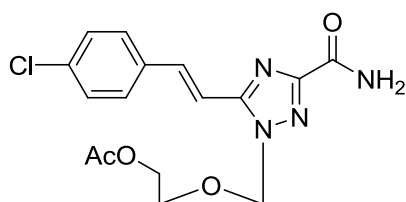

**1p:** The desired product was obtained using the general procedure starting from triazole **1** and 4-chlorostyrene with a 65% yield (47.4 mg) as a white solid. A total of 45.2 mg (62%) of product was obtained starting from triazole **3** and 4-chlorostyrene following the same procedure. <sup>1</sup>H NMR (250 MHz, CDCl<sub>3</sub>): δ 7.82 (d, 1H, *J*<sub>trans</sub> = 16.0 Hz, CH-vinyl), 7.51 (d, 2H, *J* = 8.5 Hz, -ArH), 7.38 (d, 2H, *J* = 8.5 Hz, -ArH), 7.04-6.98 (m, 2H, CH-vinyl + -C(O)NH), 6.03 (br s, 1H, -C(O)NH), 5.68 (s, 2H, -NCH<sub>2</sub>O-), 4.20 (t, 2H, *J* = 4.8 Hz, -CH<sub>2</sub>CH<sub>2</sub>OAc), 3.81 (t, 2H, *J* = 4.6 Hz, -CH<sub>2</sub>CH<sub>2</sub>OAc), 1.99 (s, 3H, -C(O)CH<sub>3</sub>); <sup>13</sup>C NMR (62.5 MHz, CDCl<sub>3</sub>): δ 170.7, 161.3, 155.4, 154.7, 138.3, 135.7, 133.5, 129.2, 128.8, 110.7, 78.0, 67.7, 62.6, 20.7; HRMS: calcd. for C<sub>16</sub>H<sub>18</sub>ClN<sub>4</sub>O<sub>4</sub><sup>+</sup> 365.1011, found 365.1012.

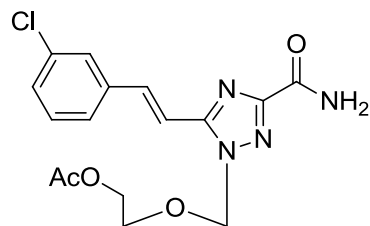

**1q:** The desired product was obtained using the general procedure starting from triazole **1** and 3-chlorostyrene with a 63% yield (46.0 mg) as a white solid.  $^1\text{H}$  NMR (250 MHz,  $\text{CDCl}_3$ ):  $\delta$  7.81 (d, 1H,  $J_{\text{trans}} = 16.0$  Hz, CH-vinyl), 7.57 (s, 1H, -ArH), 7.46-7.42 (m, 1H, -ArH), 7.36-7.34 (m, 2H, -ArH), 7.07-7.01 (m, 2H, CH-vinyl + -C(O)NH), 5.91 (br s, 1H, -C(O)NH), 5.69 (s, 2H, -NCH<sub>2</sub>O-), 4.20 (t, 2H,  $J = 4.6$  Hz, -CH<sub>2</sub>CH<sub>2</sub>OAc), 3.82 (t, 2H,  $J = 4.6$  Hz, -CH<sub>2</sub>CH<sub>2</sub>OAc), 2.01 (s, 3H, -C(O)CH<sub>3</sub>);  $^{13}\text{C}$  NMR (62.5 MHz,  $\text{CDCl}_3$ ):  $\delta$  170.7, 161.3, 155.5, 154.5, 138.1, 136.8, 135.0, 130.2, 129.7, 127.2, 126.0, 111.6, 78.0, 67.7, 62.6, 20.7; HRMS: calcd. for  $\text{C}_{16}\text{H}_{18}\text{ClN}_4\text{O}_4^+$  365.1011, found 365.1010.

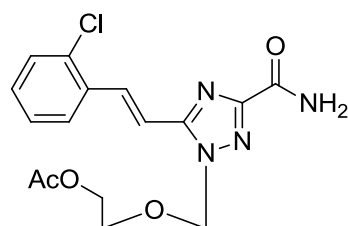

**1r:** The desired product was obtained using the general procedure starting from triazole **1** and 2-chlorostyrene with a 52% yield (37.9 mg) as a white solid.  $^1\text{H}$  NMR (250 MHz,  $\text{CDCl}_3$ ):  $\delta$  8.22 (d, 1H,  $J_{\text{trans}} = 16.0$  Hz, CH-vinyl), 7.71-7.68 (m, 1H, -ArH), 7.47-7.43 (m, 1H, -ArH), 7.35-7.30 (m, 2H, -ArH), 7.09-7.02 (m, 2H, CH-vinyl + -C(O)NH), 5.88 (br s, 1H, -C(O)NH), 5.70 (s, 2H, -NCH<sub>2</sub>O-), 4.20 (t, 2H,  $J = 4.5$  Hz, -CH<sub>2</sub>CH<sub>2</sub>OAc), 3.82 (t, 2H,  $J = 4.6$  Hz, -CH<sub>2</sub>CH<sub>2</sub>OAc), 2.00 (s, 3H,



-C(O)CH<sub>3</sub>); <sup>13</sup>C NMR (62.5 MHz, CDCl<sub>3</sub>): δ 170.7, 161.1, 155.5, 154.5, 135.6, 134.6, 133.3, 130.7, 130.3, 127.2, 113.0, 78.1, 67.7, 62.6, 20.7; HRMS: calcd. for C<sub>16</sub>H<sub>18</sub>ClN<sub>4</sub>O<sub>4</sub><sup>+</sup> 365.1011, found 365.1011.

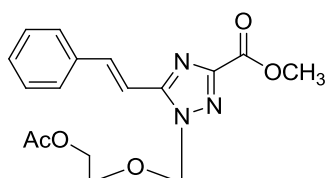

**2a:** The desired product was obtained using the general procedure starting from triazole **2** and styrene with a 70% yield (48.3 mg) as a white solid. <sup>1</sup>H NMR (250 MHz, CDCl<sub>3</sub>): δ 7.96 (d, 1H, *J*<sub>trans</sub> = 16.0 Hz, CH-vinyl), 7.60-7.56 (m, 2H, -ArH), 7.44-7.38 (m, 3H, -ArH), 7.05 (d, 1H, *J*<sub>trans</sub> = 16.0 Hz, CH-vinyl), 5.71 (s, 2H, -NCH<sub>2</sub>O-), 4.20 (t, 2H, *J* = 4.6 Hz, -CH<sub>2</sub>CH<sub>2</sub>OAc), 4.04 (s, 3H, -OCH<sub>3</sub>), 3.80 (t, 2H, *J* = 4.5 Hz, -CH<sub>2</sub>CH<sub>2</sub>OAc), 1.98 (s, 3H, -C(O)CH<sub>3</sub>); <sup>13</sup>C NMR (62.5 MHz, CDCl<sub>3</sub>): δ 170.7, 160.3, 155.5, 153.5, 140.2, 135.0, 130.0, 129.0, 127.6, 109.9, 78.1, 67.6, 62.6, 53.0, 20.7; HRMS: calcd. for C<sub>17</sub>H<sub>20</sub>N<sub>3</sub>O<sub>5</sub><sup>+</sup> 346.1397, found 346.1397.

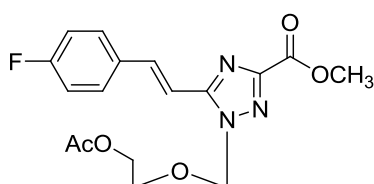

**2b:** The desired product was obtained using the general procedure starting from triazole **2** and 4-fluorostyrene with a 61% yield (44.3 mg) as a white solid. <sup>1</sup>H NMR (250 MHz, CDCl<sub>3</sub>): δ 7.90 (d, 1H, *J*<sub>trans</sub> = 16.0 Hz, CH-vinyl), 7.58-7.52 (m, 2H, -ArH), 7.08 (t, 2H, *J* = 8.6 Hz, -ArH), 6.96 (d, 1H, *J*<sub>trans</sub> = 16.0 Hz, CH-vinyl), 5.69 (s,

2H, -NCH<sub>2</sub>O-), 4.18 (t, 2H,  $J = 4.6$  Hz, -CH<sub>2</sub>CH<sub>2</sub>OAc), 4.02 (s, 3H, -OCH<sub>3</sub>), 3.78 (t, 2H,  $J = 4.6$  Hz, -CH<sub>2</sub>CH<sub>2</sub>OAc), 1.97 (s, 3H, -C(O)CH<sub>3</sub>); <sup>13</sup>C NMR (62.5 MHz, CDCl<sub>3</sub>):  $\delta$  170.6, 163.6 (d,  $J_{CF} = 249.4$  Hz), 160.2, 155.2, 153.4, 138.8, 131.1 (d,  $J_{CF} = 3.4$  Hz), 129.4 (d,  $J_{CF} = 8.4$  Hz), 116.0 (d,  $J_{CF} = 21.9$  Hz), 109.5 (d,  $J_{CF} = 2.4$  Hz), 78.0, 67.6, 62.5, 52.9, 20.7; HRMS: calcd. for C<sub>17</sub>H<sub>19</sub>FN<sub>3</sub>O<sub>5</sub><sup>+</sup> 364.1303, found 364.1303.

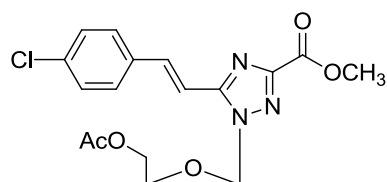

**2c:** The desired product was obtained using the general procedure starting from triazole **2** and 4-chlorostyrene with a 64% yield (48.6 mg) as a white solid. <sup>1</sup>H NMR (250 MHz, CDCl<sub>3</sub>):  $\delta$  7.90 (d, 1H,  $J_{trans} = 16.0$  Hz, CH-vinyl), 7.51 (d, 2H,  $J = 8.5$  Hz, -ArH), 7.37 (d, 2H,  $J = 8.5$  Hz, -ArH), 7.02 (d, 1H,  $J_{trans} = 16.0$  Hz, CH-vinyl), 5.70 (s, 2H, -NCH<sub>2</sub>O-), 4.19 (t, 2H,  $J = 4.6$  Hz, -CH<sub>2</sub>CH<sub>2</sub>OAc), 4.03 (s, 3H, -OCH<sub>3</sub>), 3.79 (t, 2H,  $J = 4.6$  Hz, -CH<sub>2</sub>CH<sub>2</sub>OAc), 1.98 (s, 3H, -C(O)CH<sub>3</sub>); <sup>13</sup>C NMR (62.5 MHz, CDCl<sub>3</sub>):  $\delta$  170.6, 160.2, 155.2, 153.6, 138.7, 135.8, 133.4, 129.2, 128.8, 110.4, 78.1, 67.7, 62.5, 53.0, 20.7; HRMS: calcd. for C<sub>17</sub>H<sub>19</sub>ClN<sub>3</sub>O<sub>5</sub><sup>+</sup> 380.1008, found 380.1007.

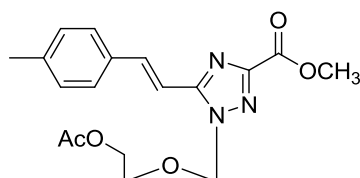

**2d:** The desired product was obtained using the general procedure starting from

triazole **2** and 4-methylstyrene with a 65% yield (46.7 mg) as a white solid.  $^1\text{H}$  NMR (250 MHz,  $\text{CDCl}_3$ ):  $\delta$  7.93 (d, 1H,  $J_{\text{trans}} = 16.3$  Hz, CH-vinyl), 7.47 (d, 2H,  $J = 8.0$  Hz, -ArH), 7.21 (d, 2H,  $J = 7.8$  Hz, -ArH), 6.99 (d, 1H,  $J_{\text{trans}} = 16.0$  Hz, CH-vinyl), 5.69 (s, 2H, -NCH<sub>2</sub>O-), 4.19 (t, 2H,  $J = 4.5$  Hz, -CH<sub>2</sub>CH<sub>2</sub>OAc), 4.03 (s, 3H, -OCH<sub>3</sub>), 3.79 (t, 2H,  $J = 4.5$  Hz, -CH<sub>2</sub>CH<sub>2</sub>OAc), 2.38 (s, 3H, -CH<sub>3</sub>), 1.98 (s, 3H, -C(O)CH<sub>3</sub>);  $^{13}\text{C}$  NMR (62.5 MHz,  $\text{CDCl}_3$ ):  $\delta$  170.7, 160.3, 155.7, 153.5, 140.3, 140.2, 132.2, 129.7, 127.6, 108.8, 78.0, 67.6, 62.6, 52.9, 21.4, 20.7; HRMS: calcd. for  $\text{C}_{18}\text{H}_{22}\text{N}_3\text{O}_5^+$  360.1554, found 360.1554.

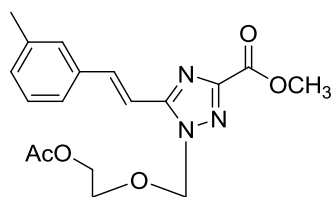

**2e:** The desired product was obtained starting from triazole **2** and 3-methylstyrene with a 66% yield (47.4 mg) as a white solid.  $^1\text{H}$  NMR (250 MHz,  $\text{CDCl}_3$ ):  $\delta$  7.93 (d, 1H,  $J_{\text{trans}} = 16.0$  Hz, CH-vinyl), 7.39-7.36 (m, 2H, -ArH), 7.31 (d, 1H,  $J = 7.5$  Hz, -ArH), 7.19 (d, 1H,  $J = 7.5$  Hz, -ArH), 7.03 (d, 1H,  $J_{\text{trans}} = 16.0$  Hz, CH-vinyl), 5.71 (s, 2H, -NCH<sub>2</sub>O-), 4.20 (t, 2H,  $J = 4.6$  Hz, -CH<sub>2</sub>CH<sub>2</sub>OAc), 4.03 (s, 3H, -OCH<sub>3</sub>), 3.80 (t, 2H,  $J = 4.6$  Hz, -CH<sub>2</sub>CH<sub>2</sub>OAc), 2.39 (s, 3H, -CH<sub>3</sub>), 1.99 (s, 3H, -C(O)CH<sub>3</sub>);  $^{13}\text{C}$  NMR (62.5 MHz,  $\text{CDCl}_3$ ):  $\delta$  170.7, 160.3, 155.5, 153.5, 140.4, 138.6, 134.9, 130.8, 128.9, 128.1, 124.9, 109.6, 78.1, 67.6, 62.6, 52.9, 21.4, 20.7; HRMS: calcd. for  $\text{C}_{18}\text{H}_{22}\text{N}_3\text{O}_5^+$  360.1554, found 360.1554.

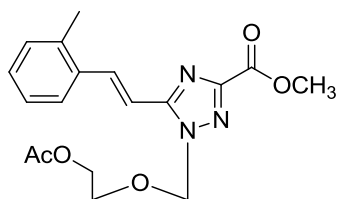

**2f:** The desired product was obtained using the general procedure starting from triazole **2** and 2-methylstyrene with a 54% yield (38.8 mg) as a white solid.  $^1\text{H}$  NMR (250 MHz,  $\text{CDCl}_3$ ):  $\delta$  8.17 (d, 1H,  $J_{\text{trans}} = 15.8$  Hz, CH-vinyl), 7.63-7.59 (m, 1H, -ArH), 7.29-7.24 (m, 3H, -ArH), 6.97 (d, 1H,  $J_{\text{trans}} = 15.8$  Hz, CH-vinyl), 5.70 (s, 2H, -NCH<sub>2</sub>O-), 4.20 (t, 2H,  $J = 4.5$  Hz, -CH<sub>2</sub>CH<sub>2</sub>OAc), 4.04 (s, 3H, -OCH<sub>3</sub>), 3.81 (t, 2H,  $J = 4.6$  Hz, -CH<sub>2</sub>CH<sub>2</sub>OAc), 2.47 (s, 3H, -CH<sub>3</sub>), 1.99 (s, 3H, -C(O)CH<sub>3</sub>);  $^{13}\text{C}$  NMR (62.5 MHz,  $\text{CDCl}_3$ ):  $\delta$  170.5, 160.1, 155.4, 153.3, 137.7, 137.3, 133.9, 130.7, 129.5, 126.2, 125.7, 111.2, 78.0, 67.4, 62.4, 52.8, 20.5, 19.8; HRMS: calcd. for  $\text{C}_{18}\text{H}_{22}\text{N}_3\text{O}_5^+$  360.1554, found 360.1554.

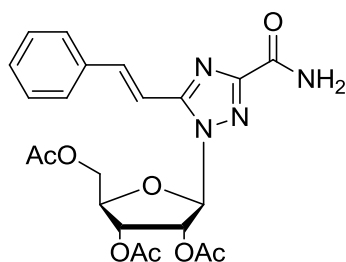

**4a:** The desired product was obtained using the general procedure starting from triazole **4** and styrene with a 56% yield (52.9 mg) as a white solid.  $^1\text{H}$  NMR (250 MHz,  $\text{CDCl}_3$ ):  $\delta$  7.92 (d, 1H,  $J_{\text{trans}} = 16.0$  Hz, CH-vinyl), 7.58-7.54 (m, 2H, -ArH), 7.41-7.36 (m, 3H, -ArH), 7.02 (br s, 1H, -C(O)NH), 6.95 (d, 1H,  $J_{\text{trans}} = 15.8$  Hz, CH-vinyl), 6.25 (br s, 1H, -C(O)NH), 6.11 (d, 1H,  $J = 3.3$  Hz, H-1'), 6.00-5.96 (m, 1H, H-2'), 5.71 (t, 1H,  $J = 5.5$  Hz, H-3'), 4.49-4.39 (m, 2H, H-4' + H-5'), 4.21-4.14

(m, 1H, H-5'), 2.12 (s, 6H, -C(O)CH<sub>3</sub>), 2.02 (s, 3H, -C(O)CH<sub>3</sub>); <sup>13</sup>C NMR (62.5 MHz, CDCl<sub>3</sub>): δ 170.6, 169.5, 169.3, 160.7, 155.9, 140.7, 135.0, 130.0, 129.0, 127.7, 109.5, 87.9, 81.0, 74.2, 71.0, 62.8, 20.6, 20.5; HRMS: calcd. for C<sub>22</sub>H<sub>25</sub>N<sub>4</sub>O<sub>8</sub><sup>+</sup> 473.1667, found 473.1669.

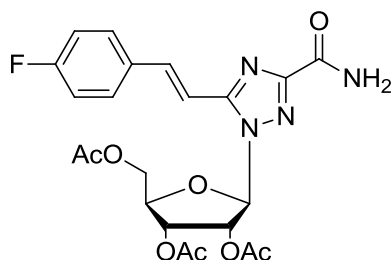

**4b:** The desired product was obtained using the general procedure starting from triazole **4** and 4-fluorostyrene with a 57% yield (55.9 mg) as a white solid. <sup>1</sup>H NMR (250 MHz, CDCl<sub>3</sub>): δ 7.88 (d, 1H, *J*<sub>trans</sub> = 15.8 Hz, CH-vinyl), 7.57-7.52 (m, 2H, -ArH), 7.11-7.02 (m, 3H, -ArH + -C(O)NH), 6.87 (d, 1H, *J*<sub>trans</sub> = 15.8 Hz, CH-vinyl), 6.21 (br s, 1H, -C(O)NH), 6.10 (s, 1H, H-1'), 5.98-5.97 (m, 1H, H-2'), 5.71 (t, 1H, *J* = 5.1 Hz, H-3'), 4.40-4.39 (m, 2H, H-4' + H-5'), 4.20-4.14 (m, 1H, H-5'), 2.12 (s, 6H, -C(O)CH<sub>3</sub>), 2.01 (s, 3H, -C(O)CH<sub>3</sub>); <sup>13</sup>C NMR (62.5 MHz, CDCl<sub>3</sub>): δ 170.5, 169.5, 169.4, 163.7 (d, *J*<sub>CF</sub> = 249.4 Hz), 160.7, 155.9, 155.5, 139.4, 131.3 (d, *J*<sub>CF</sub> = 3.3 Hz), 129.5 (d, *J*<sub>CF</sub> = 8.3 Hz), 116.1 (d, *J*<sub>CF</sub> = 21.8 Hz), 109.3 (d, *J*<sub>CF</sub> = 2.2 Hz), 87.9, 80.9, 74.2, 70.9, 62.8, 20.6, 20.5; HRMS: calcd. for C<sub>22</sub>H<sub>24</sub>FN<sub>4</sub>O<sub>8</sub><sup>+</sup> 491.1573, found 491.1570.

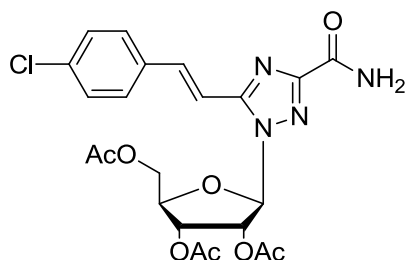

**4c:** The desired product was obtained using the general procedure starting from triazole **4** and 4-chlorostyrene with a 56% yield (56.8 mg) as a white solid.  $^1\text{H}$  NMR (250 MHz,  $\text{CDCl}_3$ ):  $\delta$  7.89 (d, 1H,  $J_{\text{trans}} = 15.8$  Hz, CH-vinyl), 7.51 (d, 2H,  $J = 8.5$  Hz, -ArH), 7.38 (d, 2H,  $J = 8.5$  Hz, -ArH), 6.96-6.90 (m, 2H, CH-vinyl + -C(O)NH), 6.10 (d, 1H,  $J = 3.0$  Hz, H-1'), 6.00-5.97 (m, 1H, H-2'), 5.72 (t, 2H,  $J = 5.5$  Hz, H-3' + -C(O)NH), 4.50-4.40 (m, 2H, H-4' + H-5'), 4.23-4.16 (m, 1H, H-5'), 2.14 (m, 6H, -C(O)CH<sub>3</sub>), 2.03 (s, 3H, -C(O)CH<sub>3</sub>);  $^{13}\text{C}$  NMR (62.5 MHz,  $\text{CDCl}_3$ ):  $\delta$  170.5, 169.5, 169.4, 160.6, 155.9, 155.4, 139.2, 135.8, 133.5, 129.2, 128.8, 110.1, 87.9, 81.0, 74.2, 70.9, 62.8, 20.6, 20.5; HRMS: calcd. for  $\text{C}_{22}\text{H}_{24}\text{ClN}_4\text{O}_8^+$  507.1277, found 507.1273.

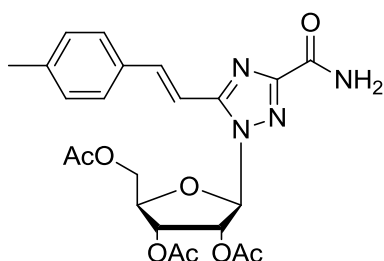

**4d:** The desired product was obtained using the general procedure starting from triazole **4** and 4-methylstyrene with a 55% yield (53.5 mg) as a white solid.  $^1\text{H}$  NMR (250 MHz,  $\text{CDCl}_3$ ):  $\delta$  7.90 (d, 1H,  $J_{\text{trans}} = 15.8$  Hz, CH-vinyl), 7.47 (d, 2H,  $J = 8.0$  Hz, -ArH), 7.21 (d, 2H,  $J = 8.0$  Hz, -ArH), 6.99 (br s, 1H, -C(O)NH), 6.90 (d, 1H,  $J_{\text{trans}} = 16.0$  Hz, CH-vinyl), 6.11 (d, 1H,  $J = 3.0$  Hz, H-1'), 6.01-5.97 (m, 1H, H-2'), 5.87 (br s, 1H, -C(O)NH), 5.73 (t, 1H,  $J = 5.5$  Hz, H-3'), 4.49-4.40 (m, 2H, H-4' + H-5'),

4.22-4.15 (m, 1H, H-5'), 2.38 (s, 3H, -CH<sub>3</sub>), 2.13 (s, 6H, -C(O)CH<sub>3</sub>), 2.04 (s, 3H, -C(O)CH<sub>3</sub>); <sup>13</sup>C NMR (62.5 MHz, CDCl<sub>3</sub>): δ 170.6, 169.5, 169.3, 160.9, 155.9, 140.7, 140.3, 132.2, 129.7, 127.6, 108.4, 87.8, 80.9, 74.2, 71.0, 62.8, 21.4, 20.6, 20.5; HRMS: calcd. for C<sub>23</sub>H<sub>27</sub>N<sub>4</sub>O<sub>8</sub><sup>+</sup> 487.1823, found 487.1824.

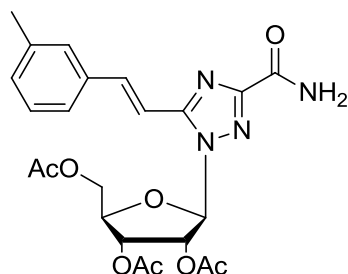

**4e:** The desired product was obtained using the general procedure starting from triazole **4** and 3-methylstyrene with a 60% yield (58.4 mg) as a white solid. <sup>1</sup>H NMR (250 MHz, CDCl<sub>3</sub>): δ 7.90 (d, 1H, *J*<sub>trans</sub> = 15.8 Hz, CH-vinyl), 7.38-7.27 (m, 3H, -ArH), 7.19 (d, 1H, *J* = 7.3 Hz, -ArH), 7.04 (br s, 1H, -C(O)NH), 6.95 (d, 1H, *J*<sub>trans</sub> = 15.8 Hz, CH-vinyl), 6.23 (br s, 1H, -C(O)NH), 6.13 (d, 1H, *J* = 3.0 Hz, H-1'), 6.02-5.99 (m, 1H, H-2'), 5.73 (t, 1H, *J* = 5.4 Hz, H-3'), 4.50-4.40 (m, 2H, H-4' + H-5'), 4.22-4.15 (m, 1H, H-5'), 2.39 (s, 3H, -CH<sub>3</sub>), 2.14 (s, 6H, -C(O)CH<sub>3</sub>), 2.03 (s, 3H, -C(O)CH<sub>3</sub>); <sup>13</sup>C NMR (62.5 MHz, CDCl<sub>3</sub>): δ 170.6, 169.5, 169.3, 160.8, 155.9, 155.7, 140.9, 138.6, 134.9, 130.8, 128.8, 128.3, 124.9, 109.3, 87.9, 81.0, 74.2, 71.0, 62.8, 21.4, 20.6, 20.5; HRMS: calcd. for C<sub>23</sub>H<sub>27</sub>N<sub>4</sub>O<sub>8</sub><sup>+</sup> 487.1823, found 487.1825.

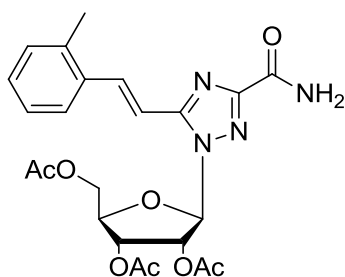

**4f:** The desired product was obtained using the general procedure starting from triazole **4** and 2-methylstyrene with a 53% yield (51.6 mg) as a white solid.  $^1\text{H}$  NMR (250 MHz,  $\text{CDCl}_3$ ):  $\delta$  8.14 (d, 1H,  $J_{\text{trans}} = 15.8$  Hz, CH-vinyl), 7.62-7.59 (m, 1H, -ArH), 7.28-7.19 (m, 3H, -ArH), 7.04 (br s, 1H, -C(O)NH), 6.87 (d, 1H,  $J_{\text{trans}} = 15.8$  Hz, CH-vinyl), 6.11 (d, 2H,  $J = 3.3$  Hz, -C(O)NH + H-1'), 6.00-5.97 (m, 1H, H-2'), 5.72 (t, 1H,  $J = 5.4$  Hz, H-3'), 4.48-4.40 (m, 2H, H-4' + H-5'), 4.22-4.15 (m, 1H, H-5'), 2.46 (s, 3H, -CH<sub>3</sub>), 2.13 (s, 6H, -C(O)CH<sub>3</sub>), 2.03 (s, 3H, -C(O)CH<sub>3</sub>);  $^{13}\text{C}$  NMR (62.5 MHz,  $\text{CDCl}_3$ ):  $\delta$  170.6, 169.5, 169.3, 160.7, 155.9, 155.7, 138.5, 137.6, 134.2, 130.9, 129.8, 126.3, 125.9, 110.9, 87.9, 81.0, 74.2, 71.0, 62.8, 20.6, 20.5, 19.9; HRMS: calcd. for  $\text{C}_{23}\text{H}_{27}\text{N}_4\text{O}_8^+$  487.1823, found 487.1825.



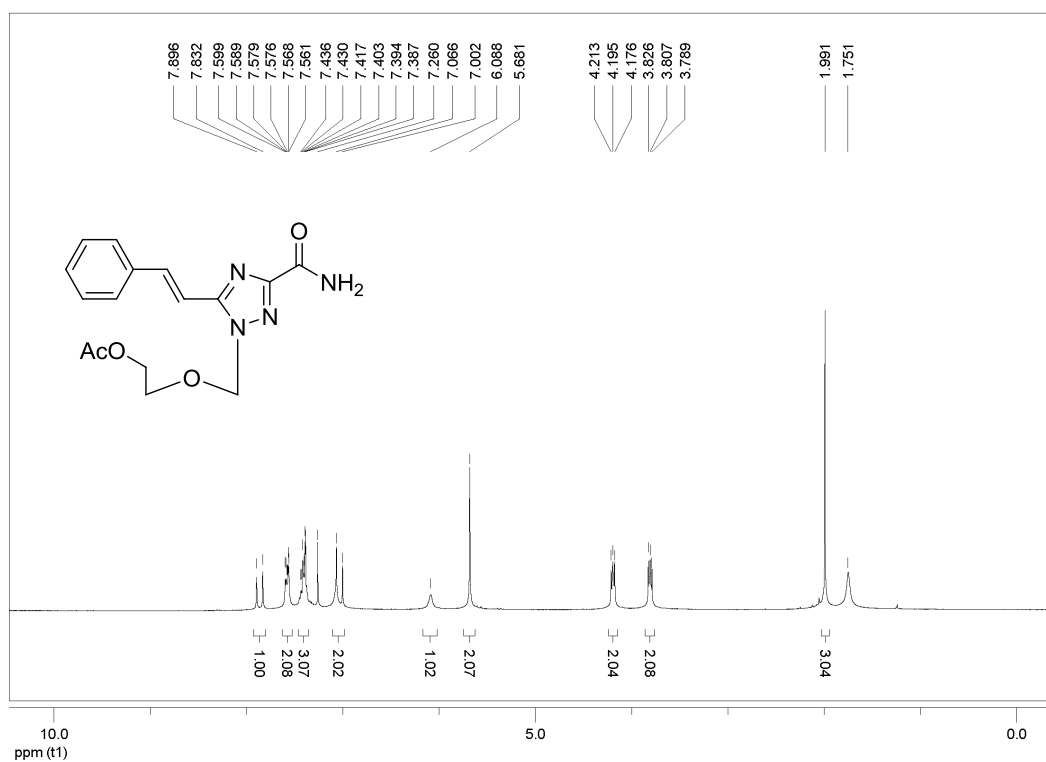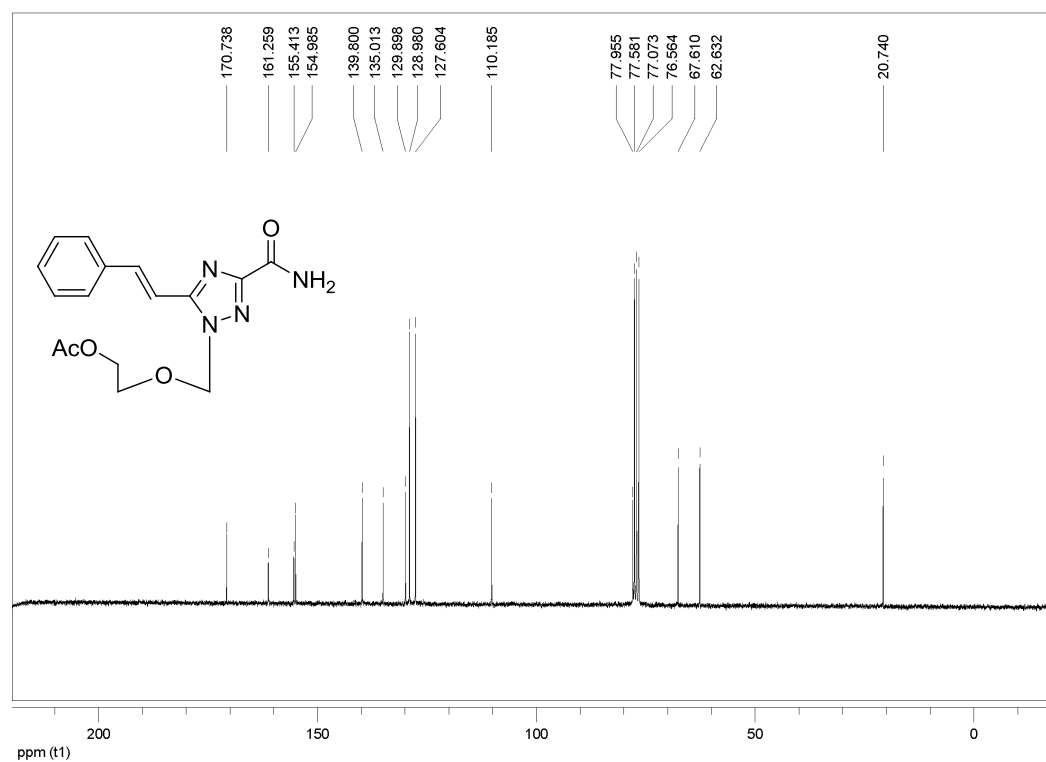

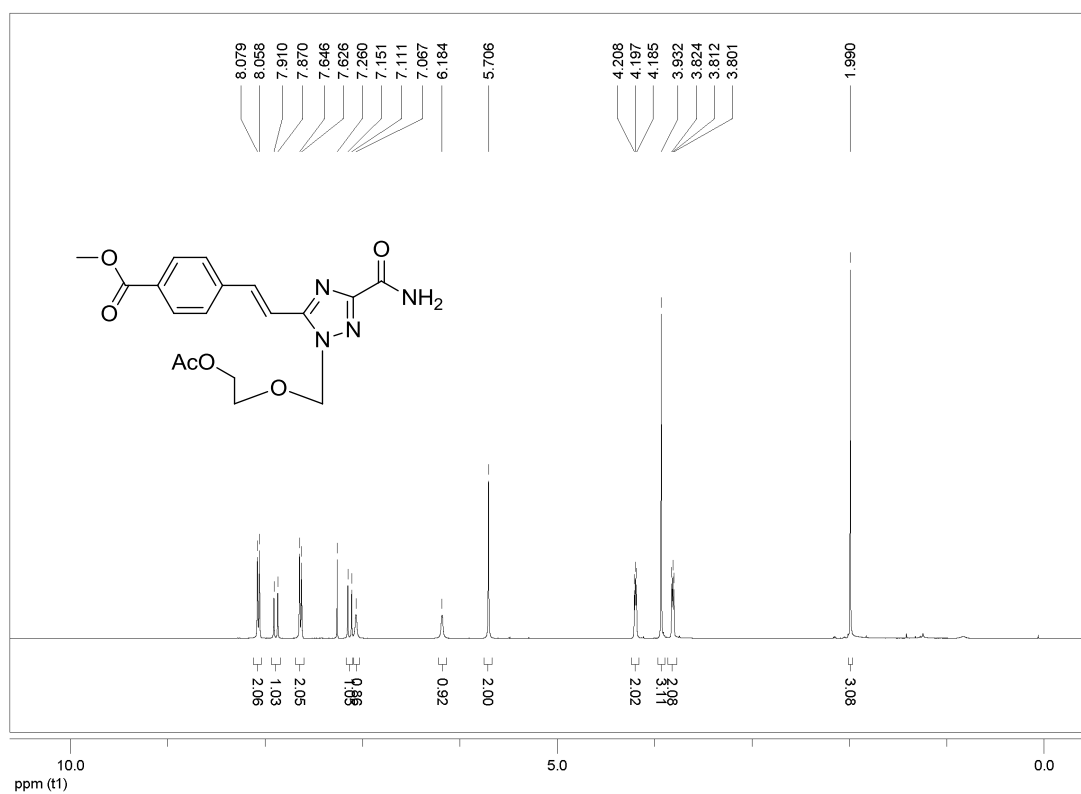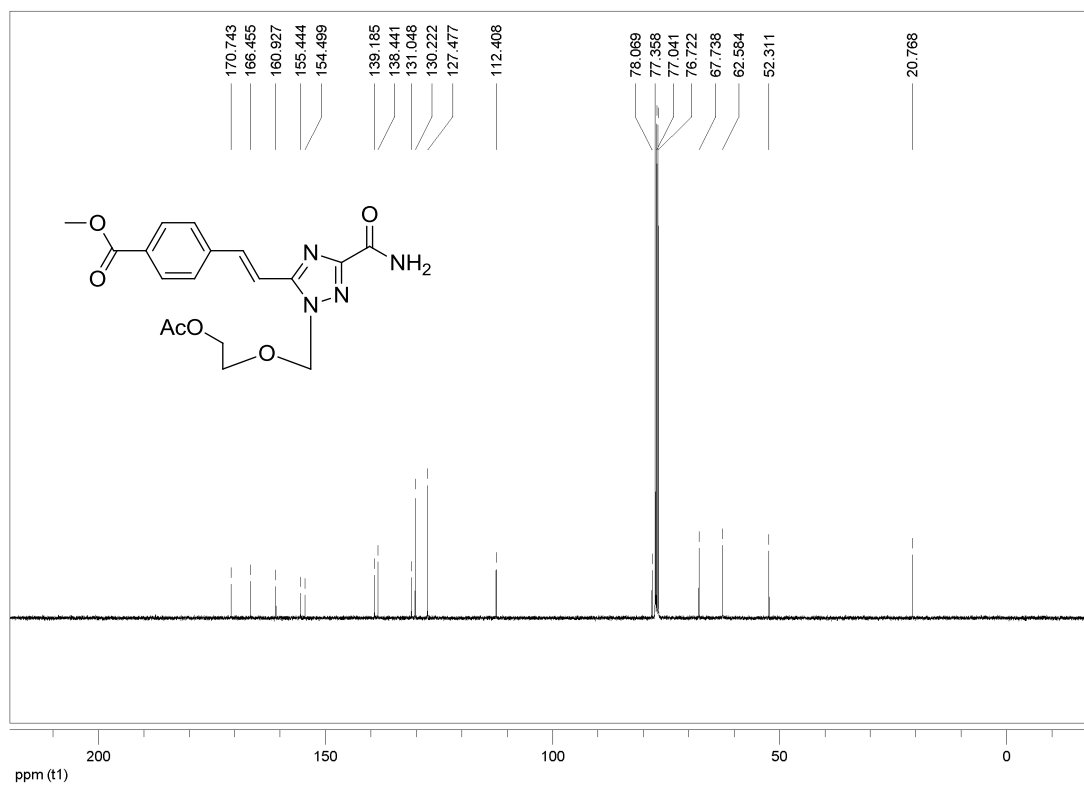

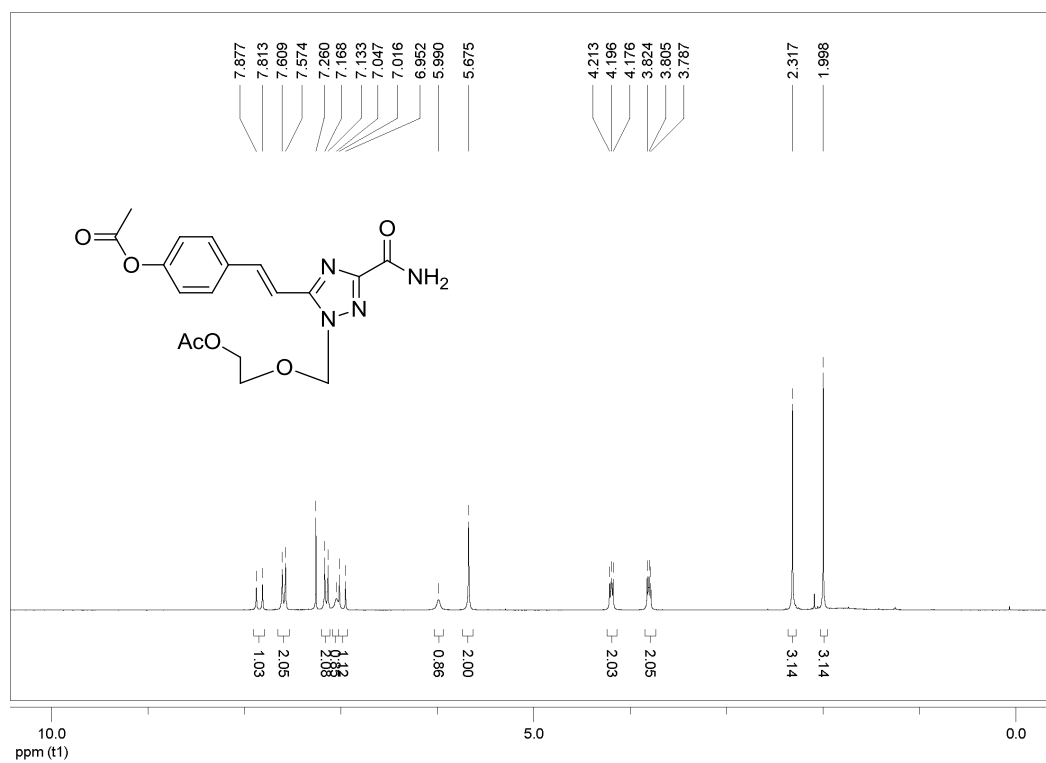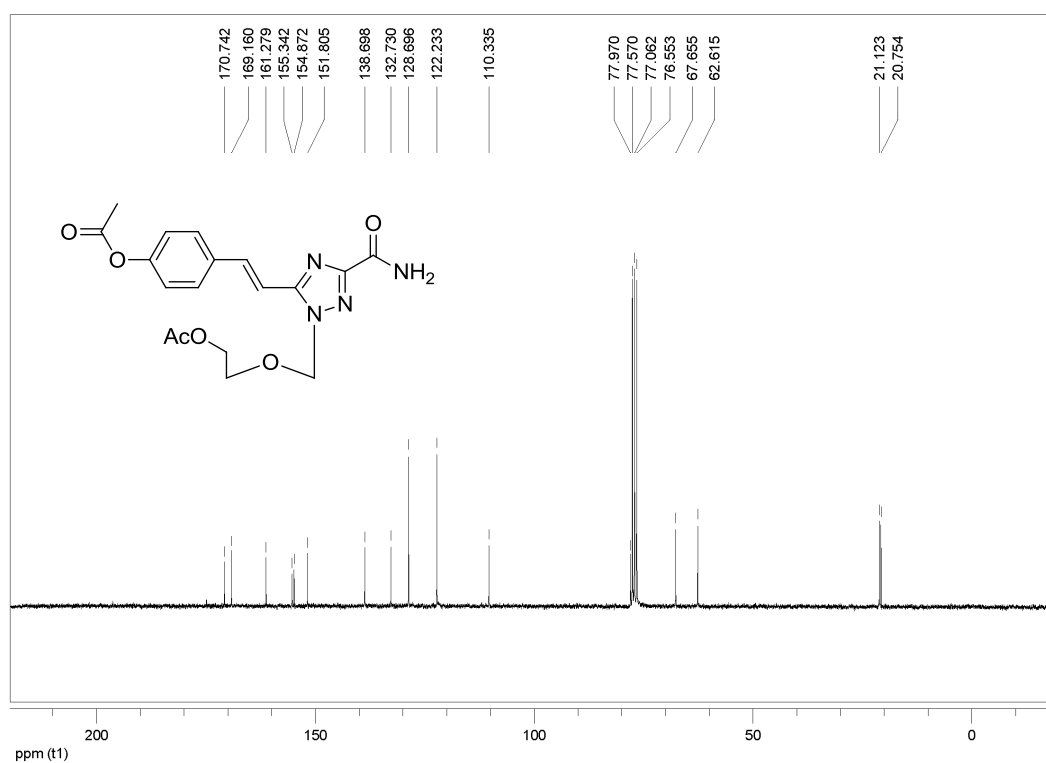

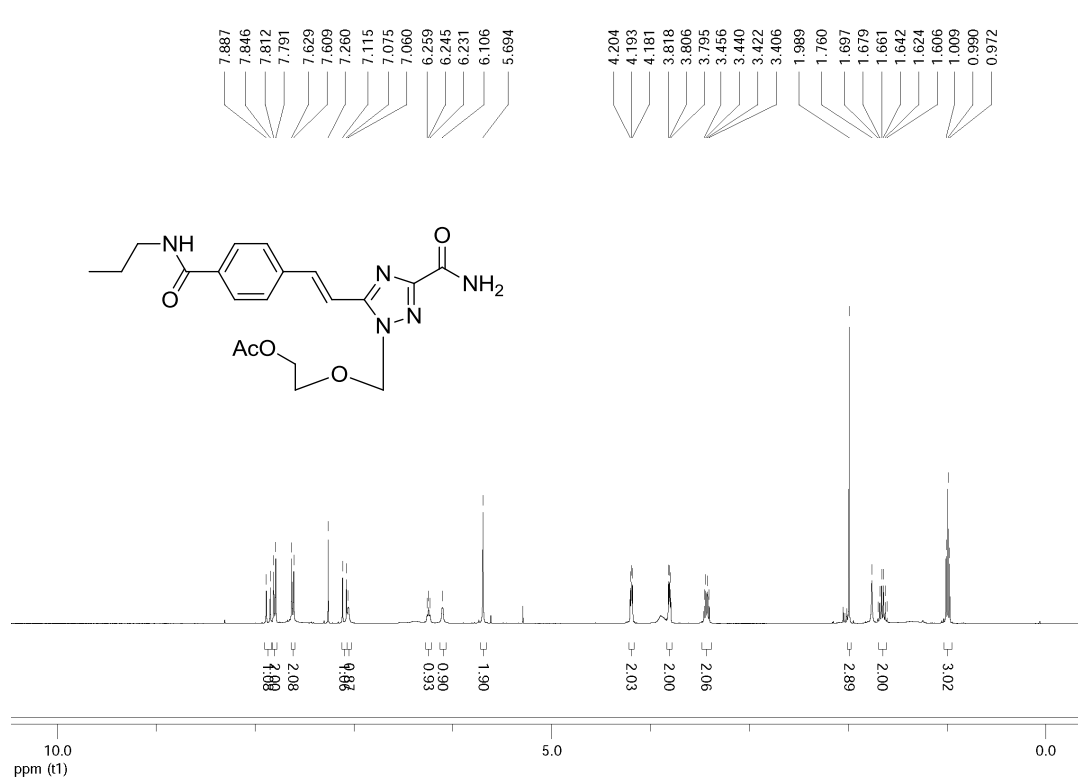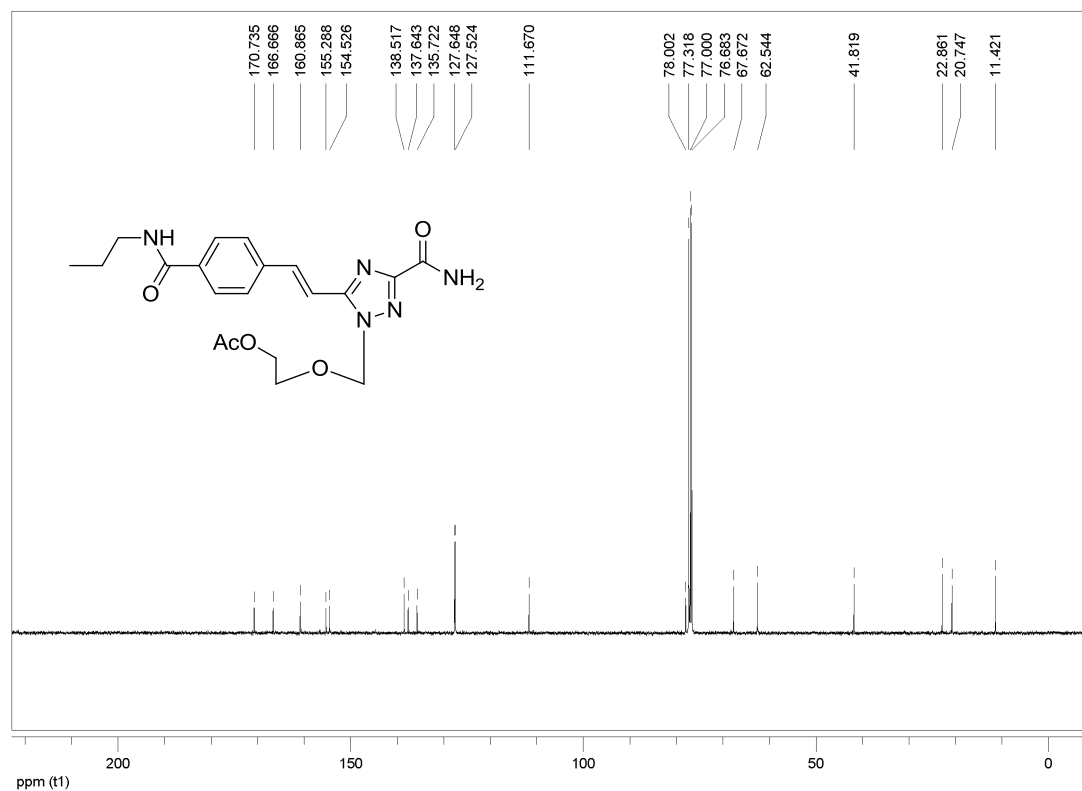

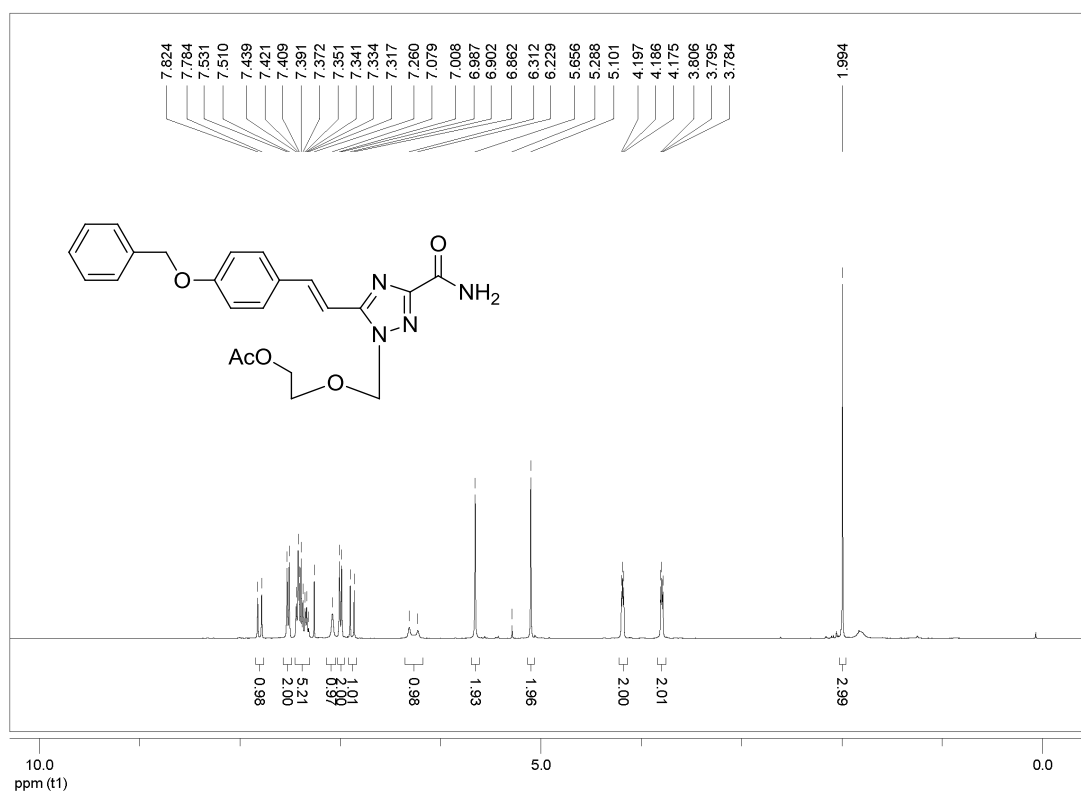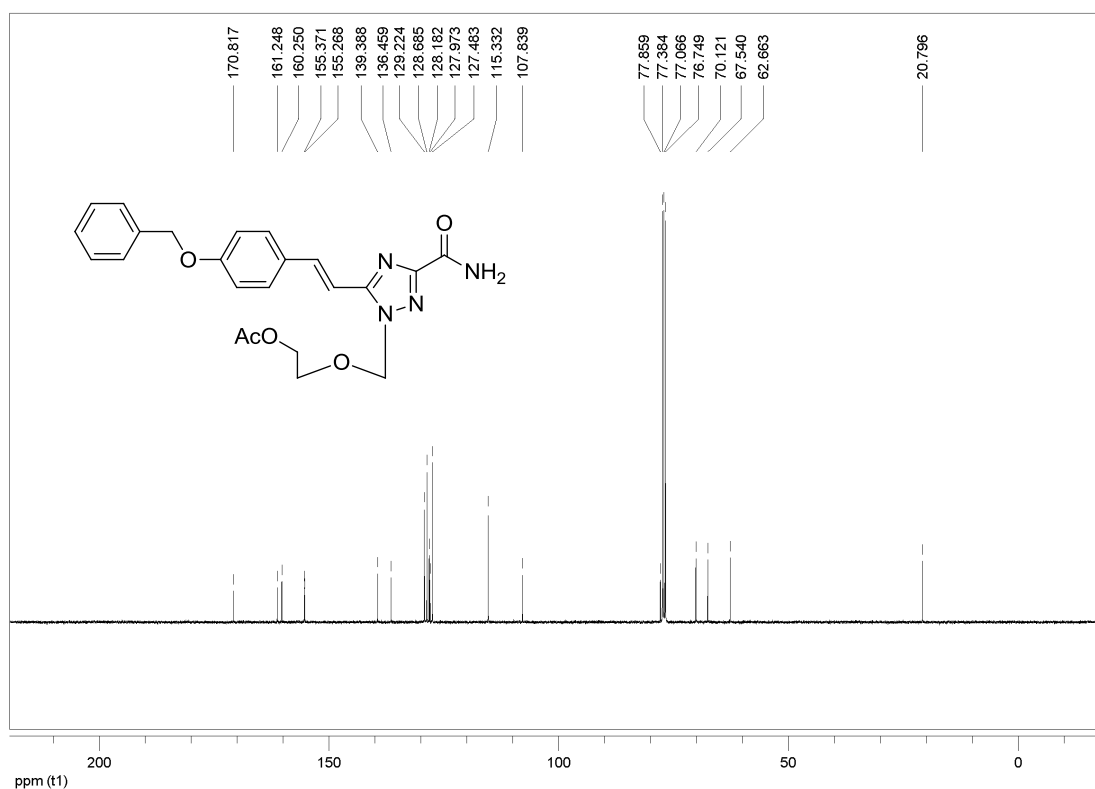

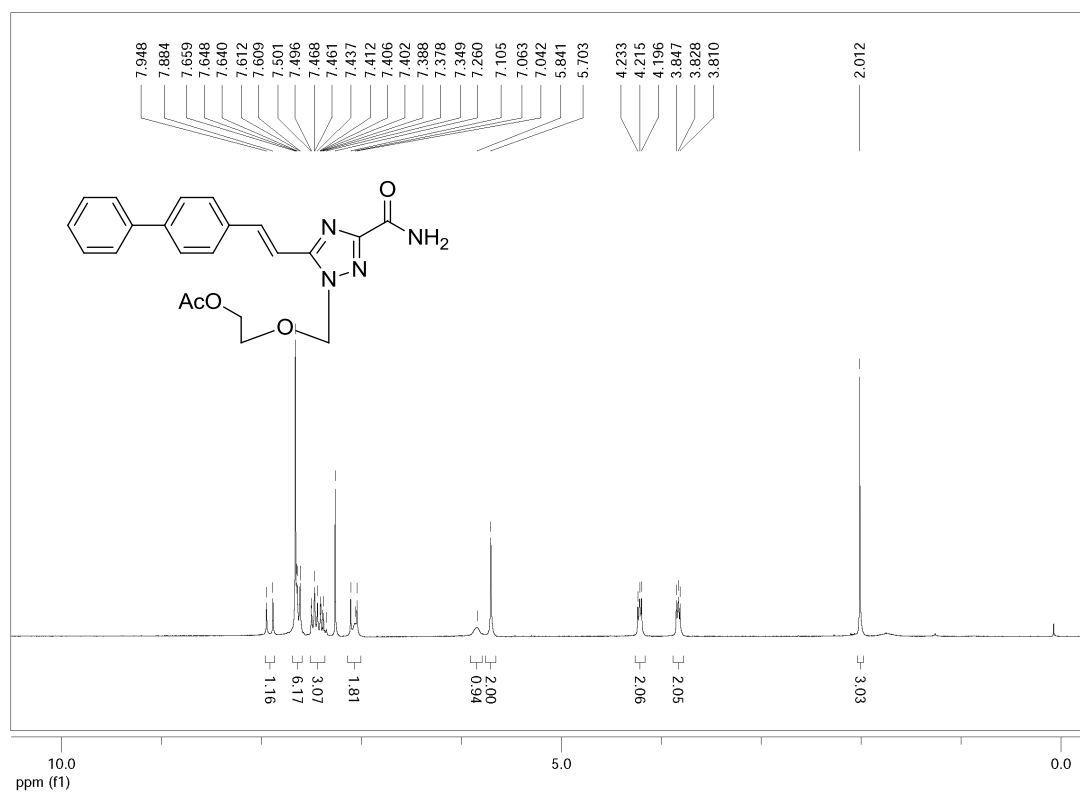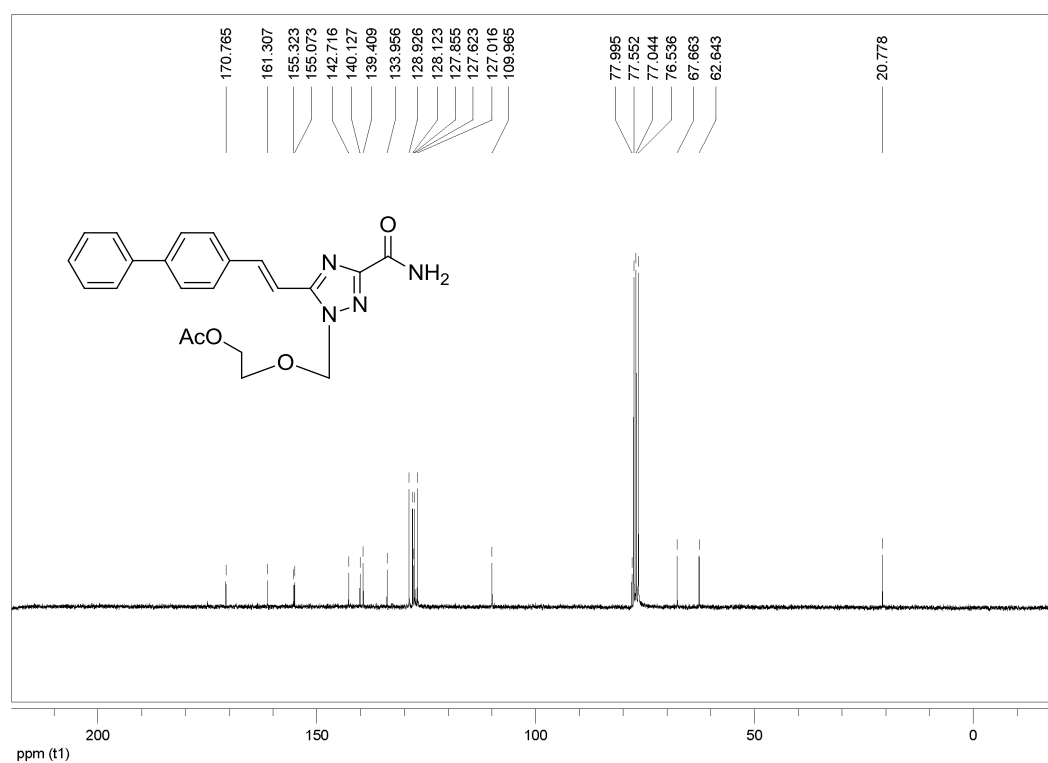

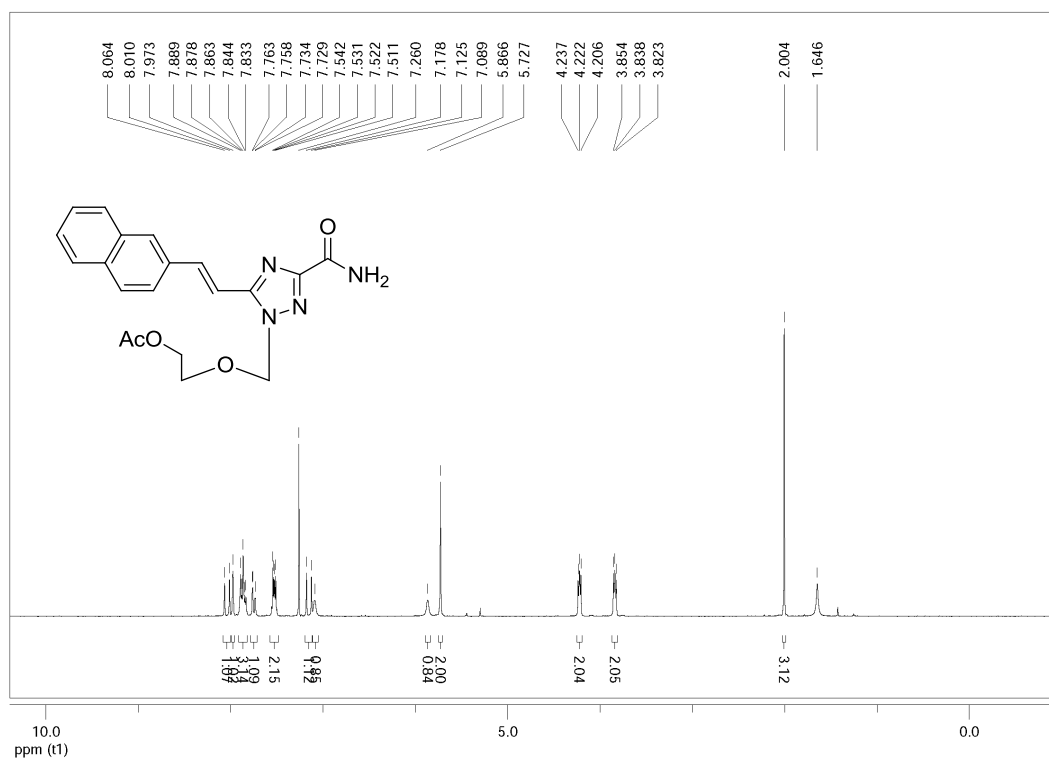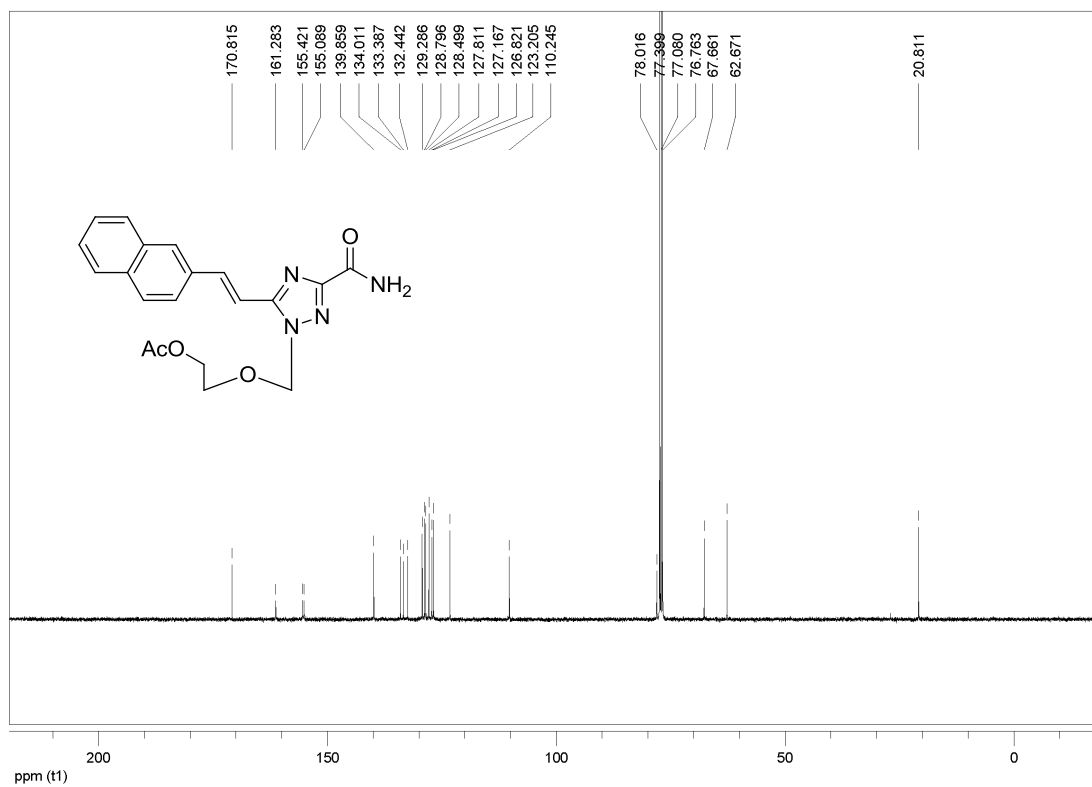

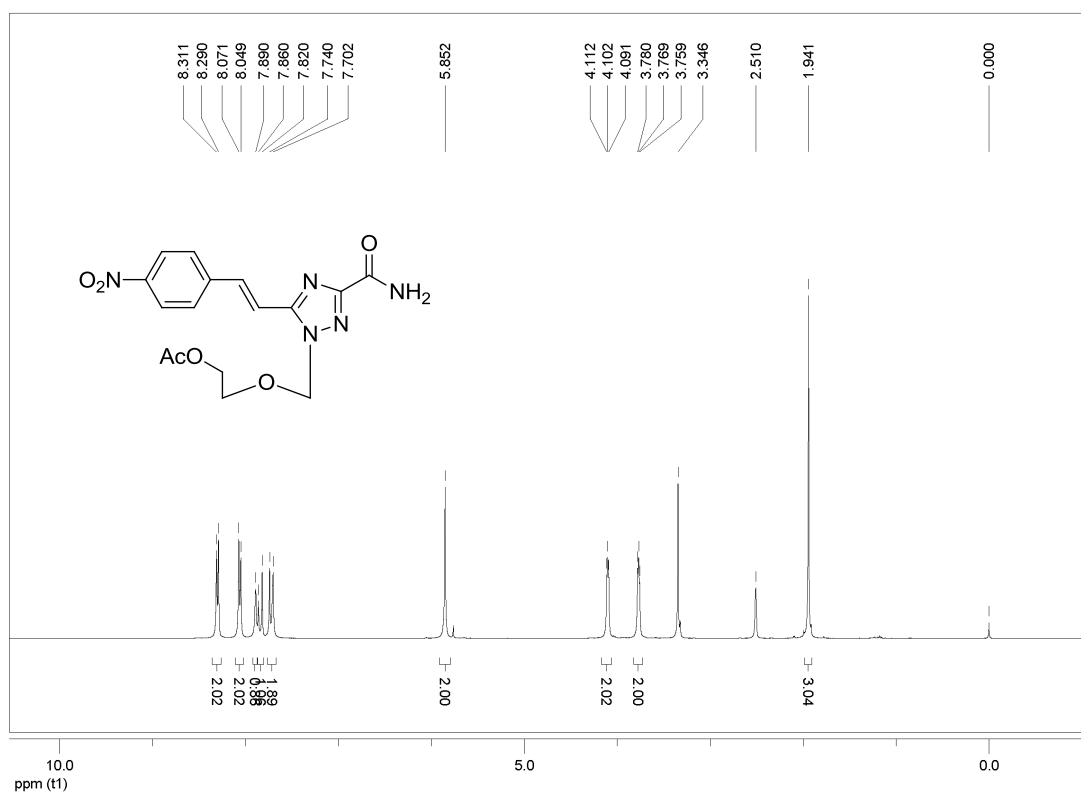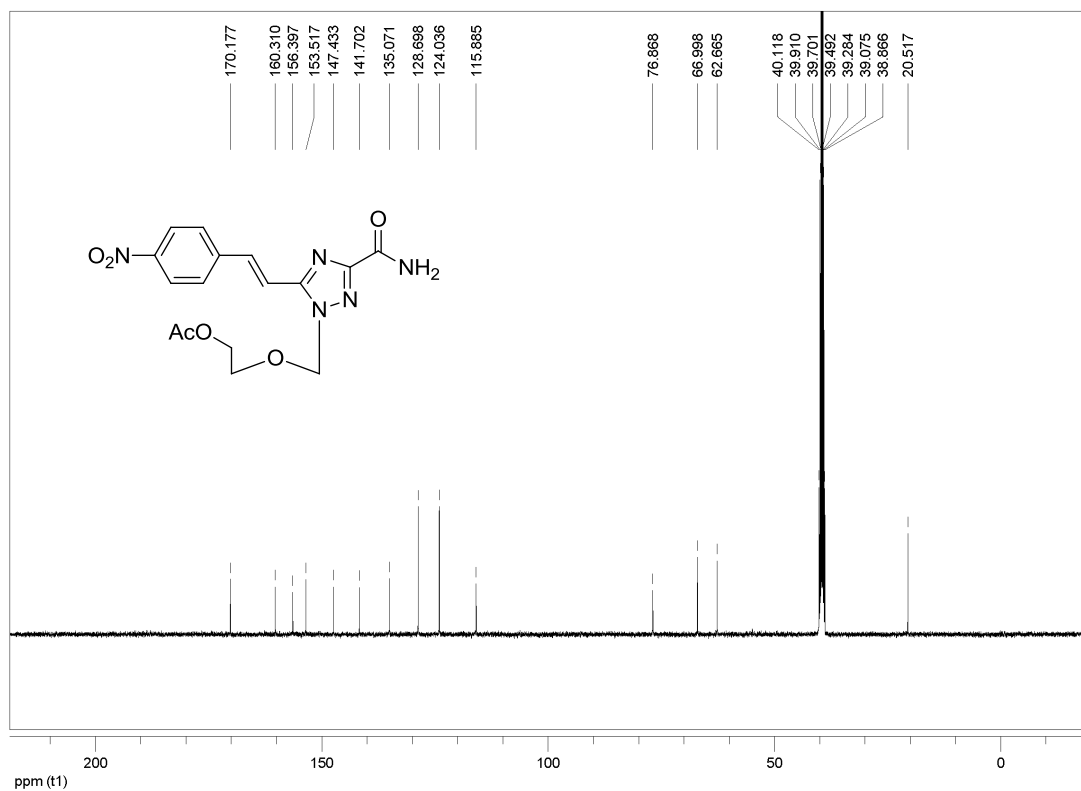



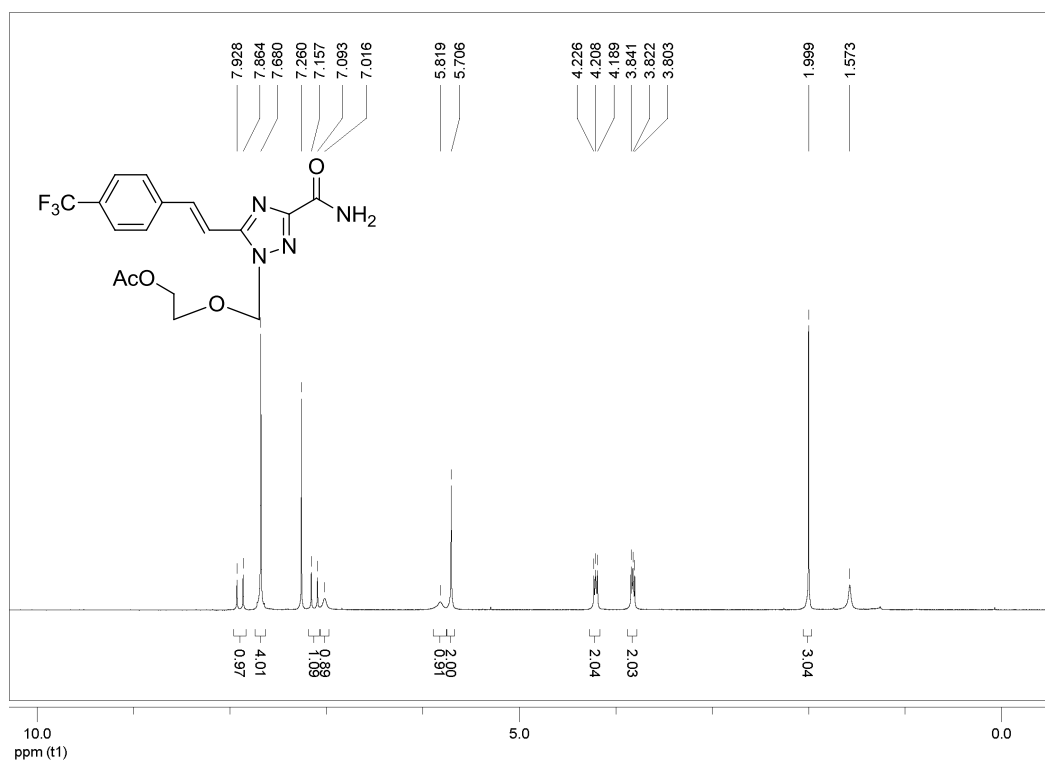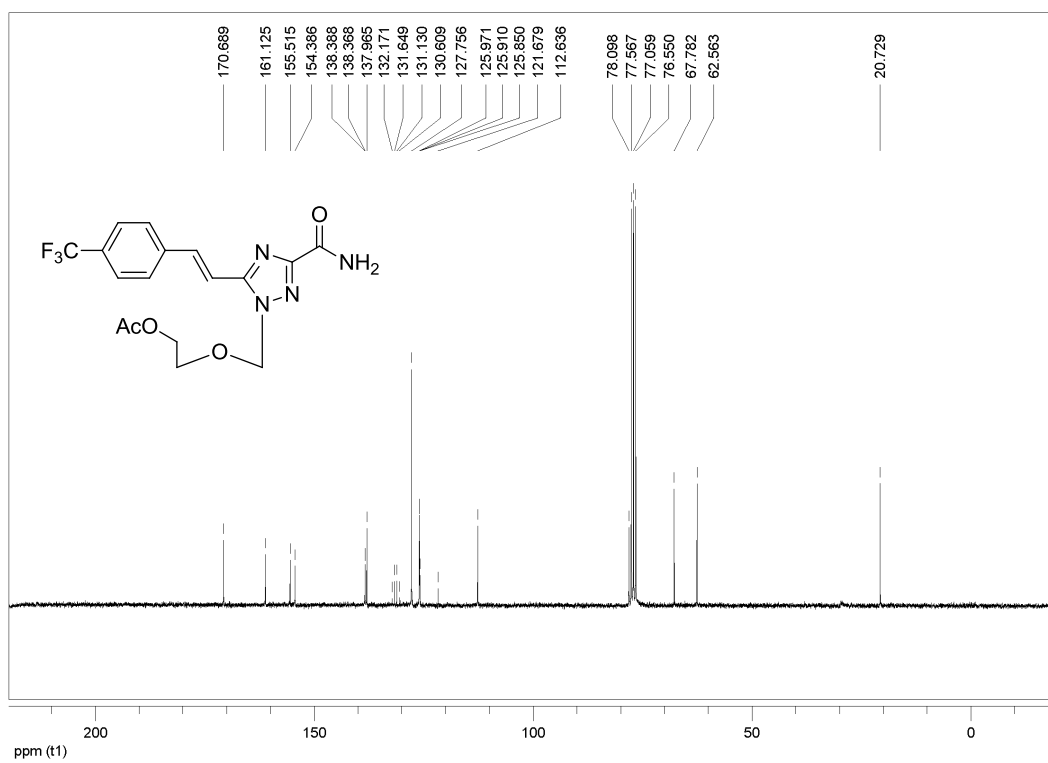

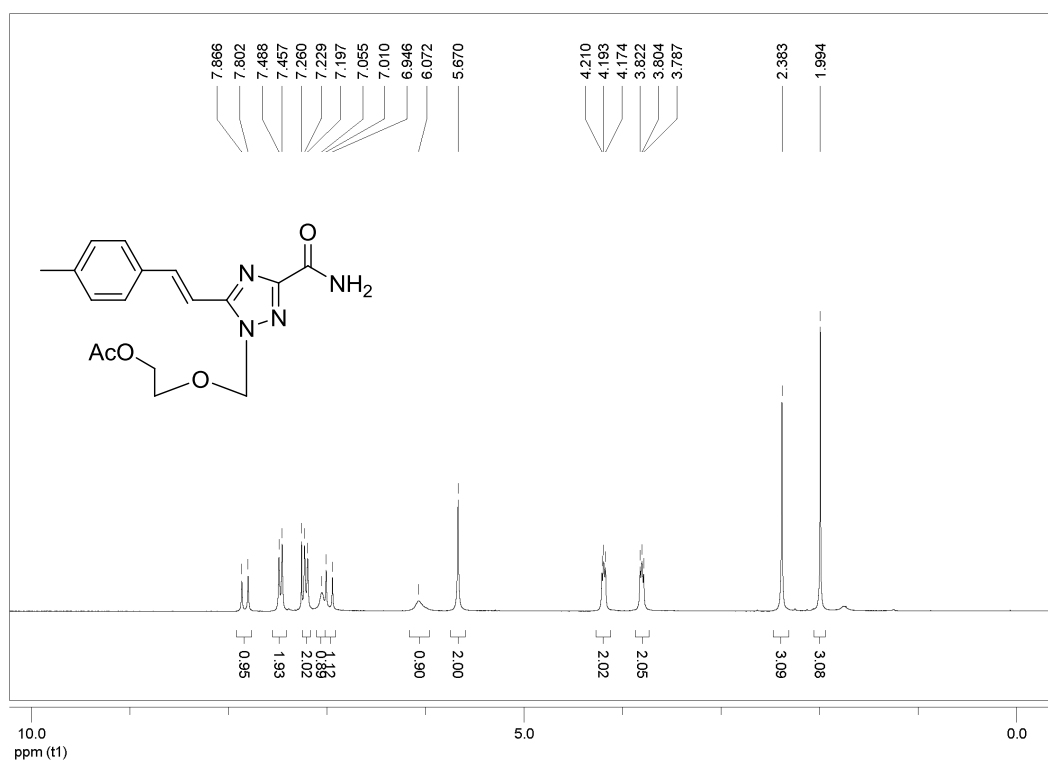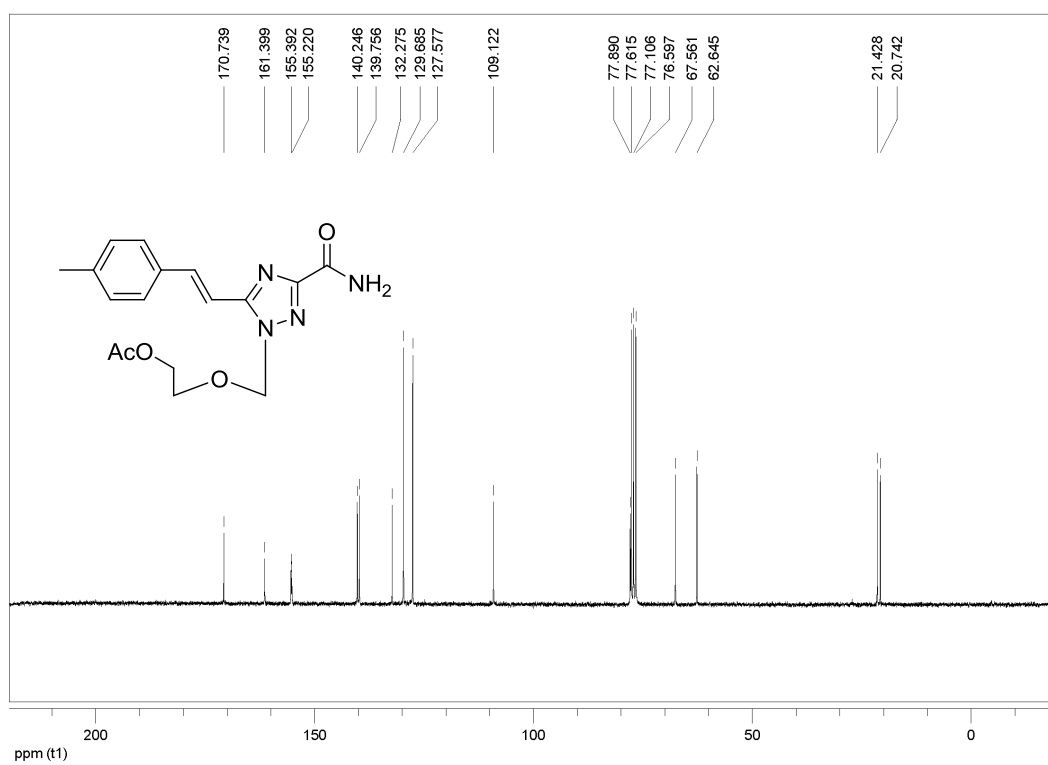

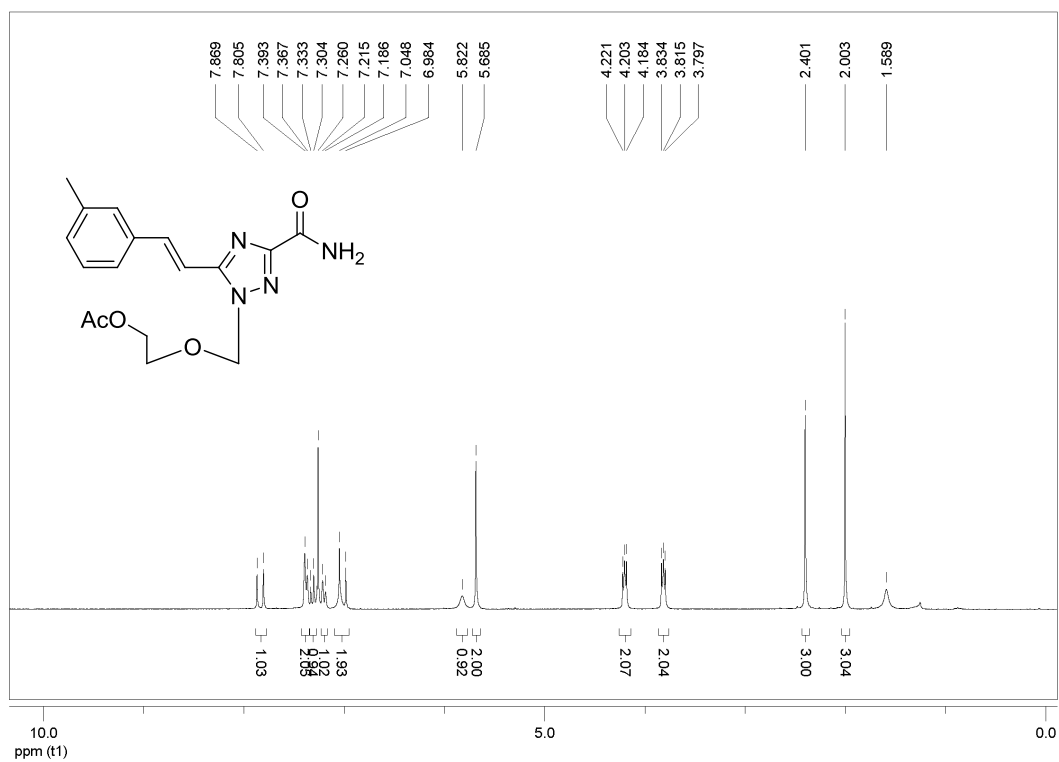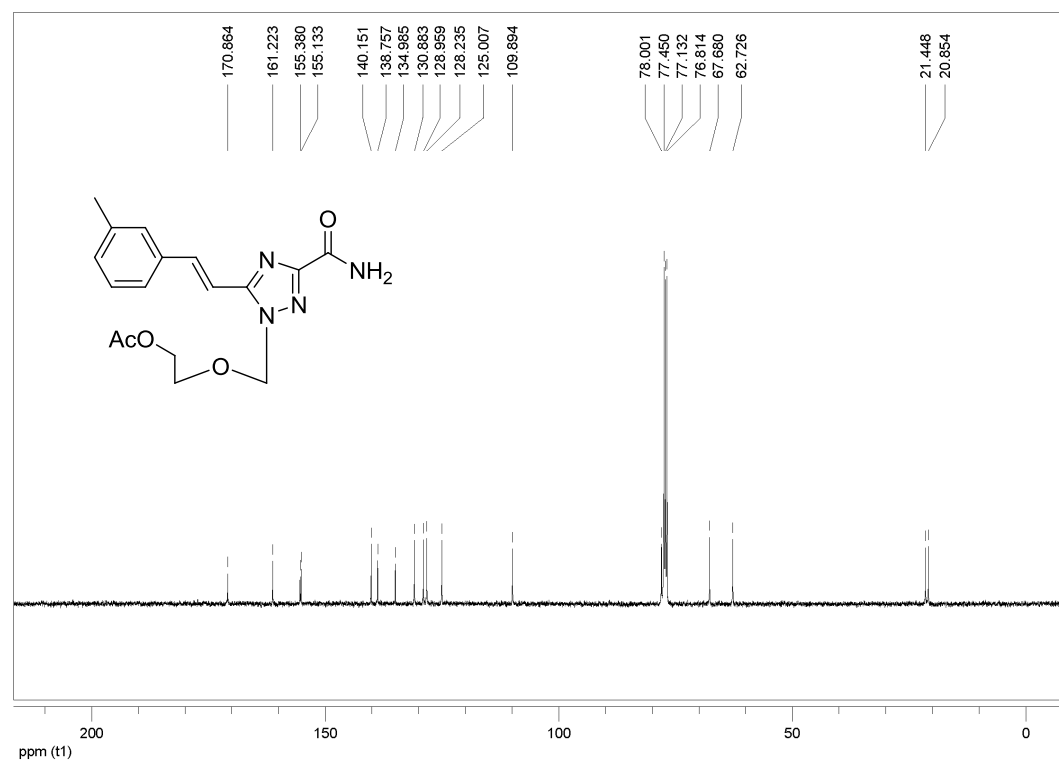

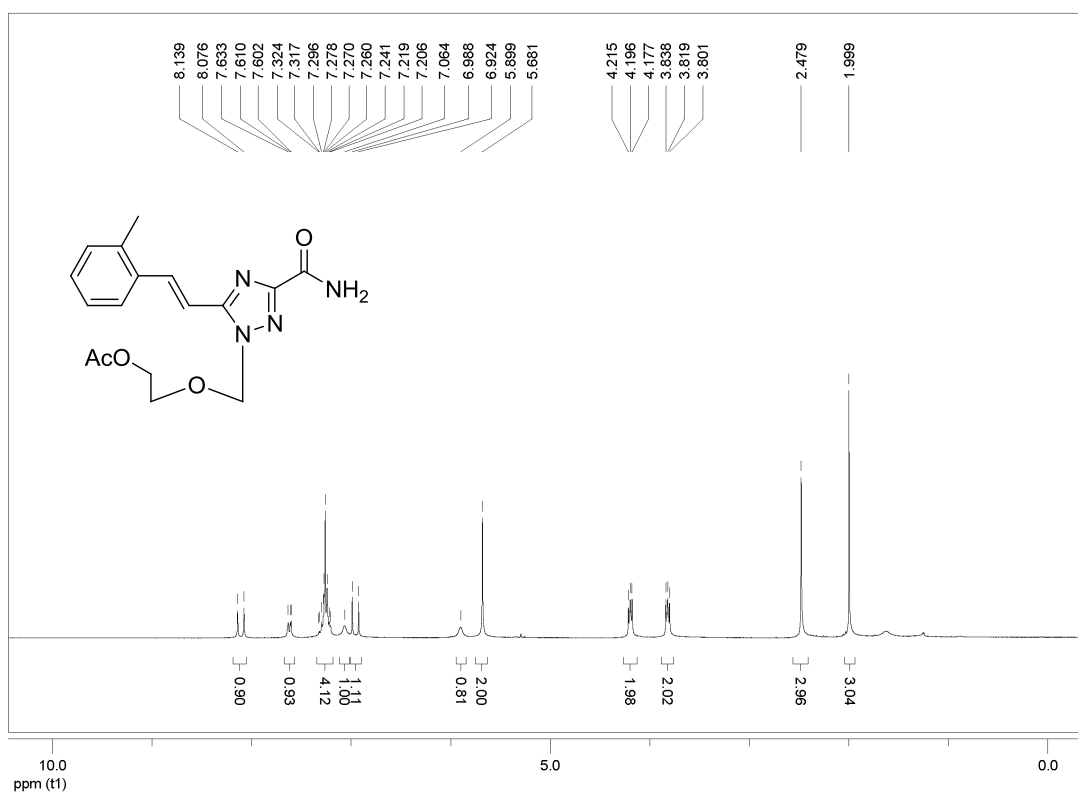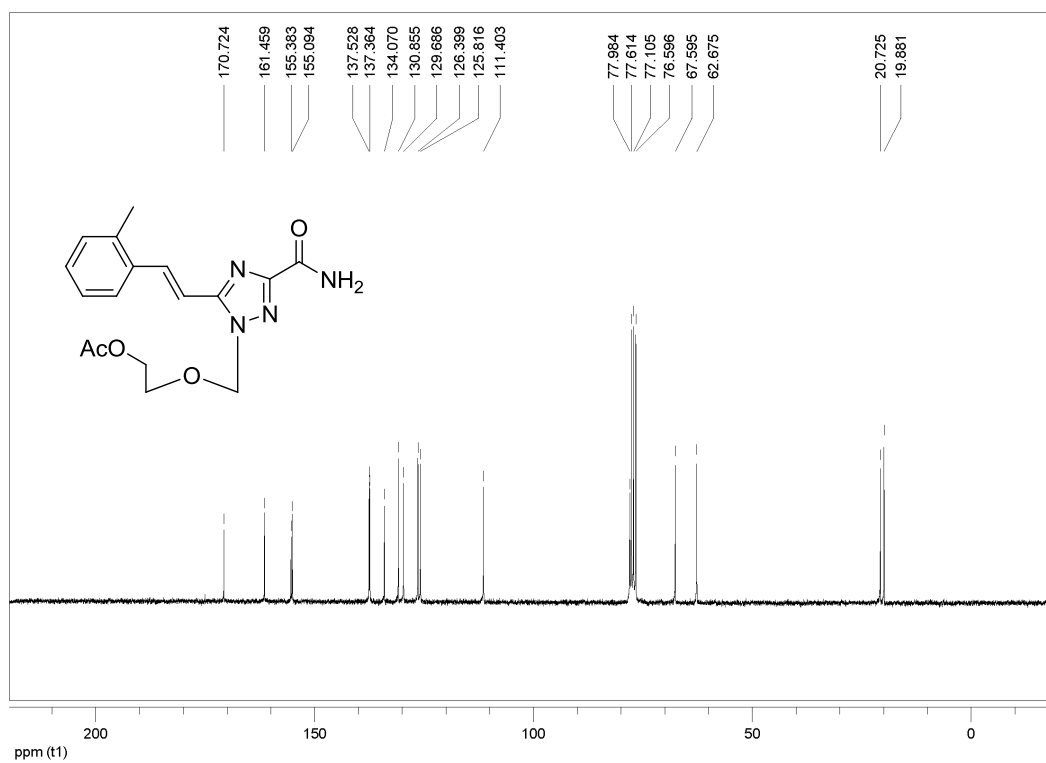

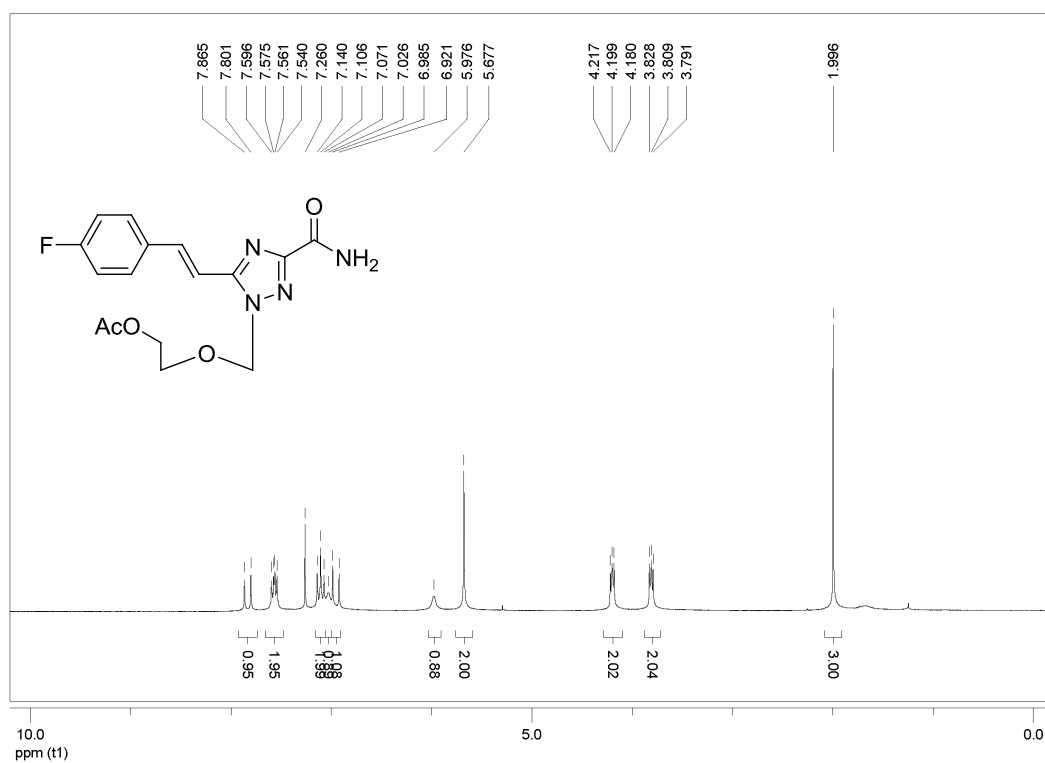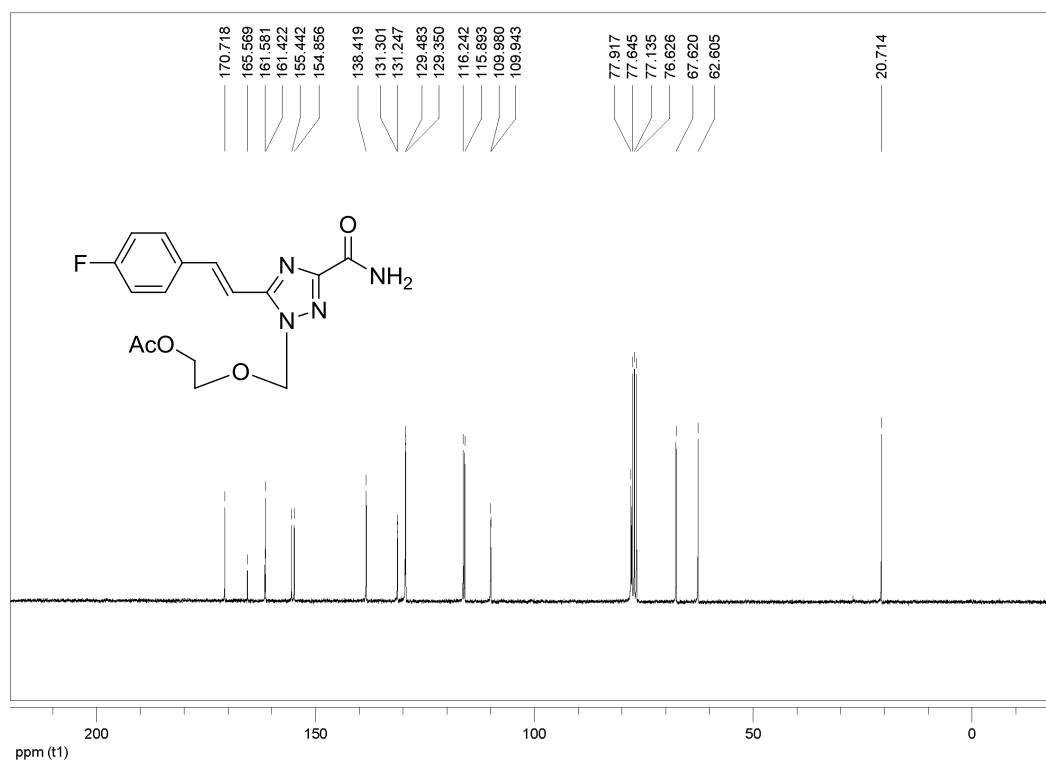

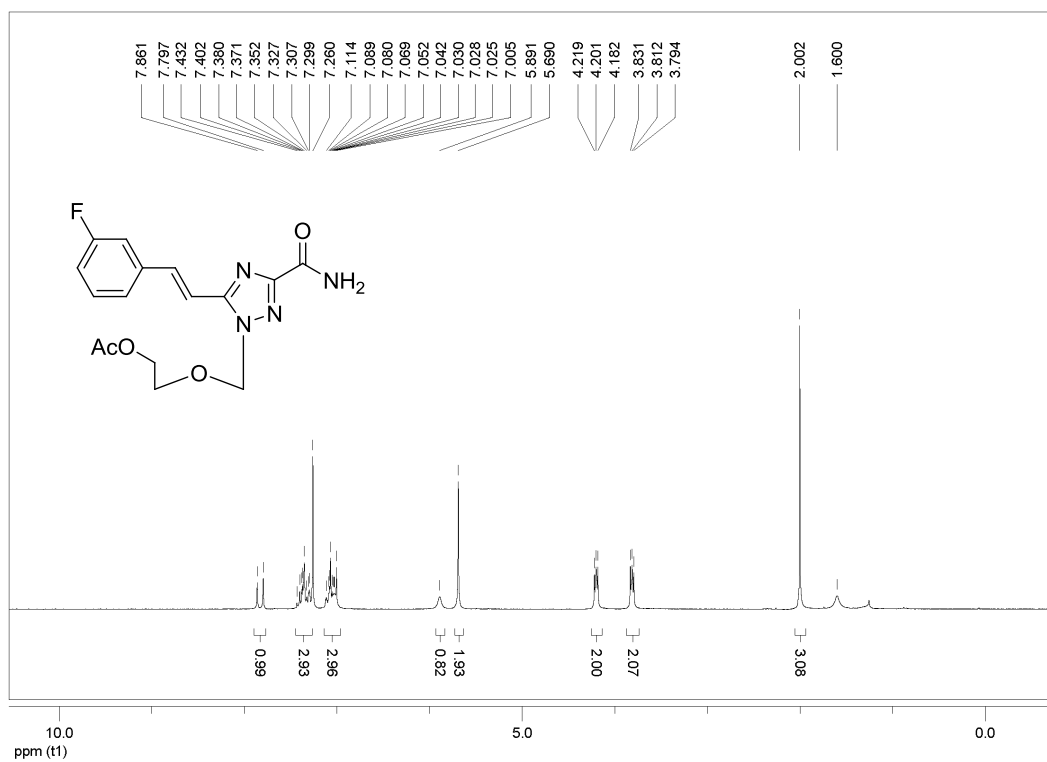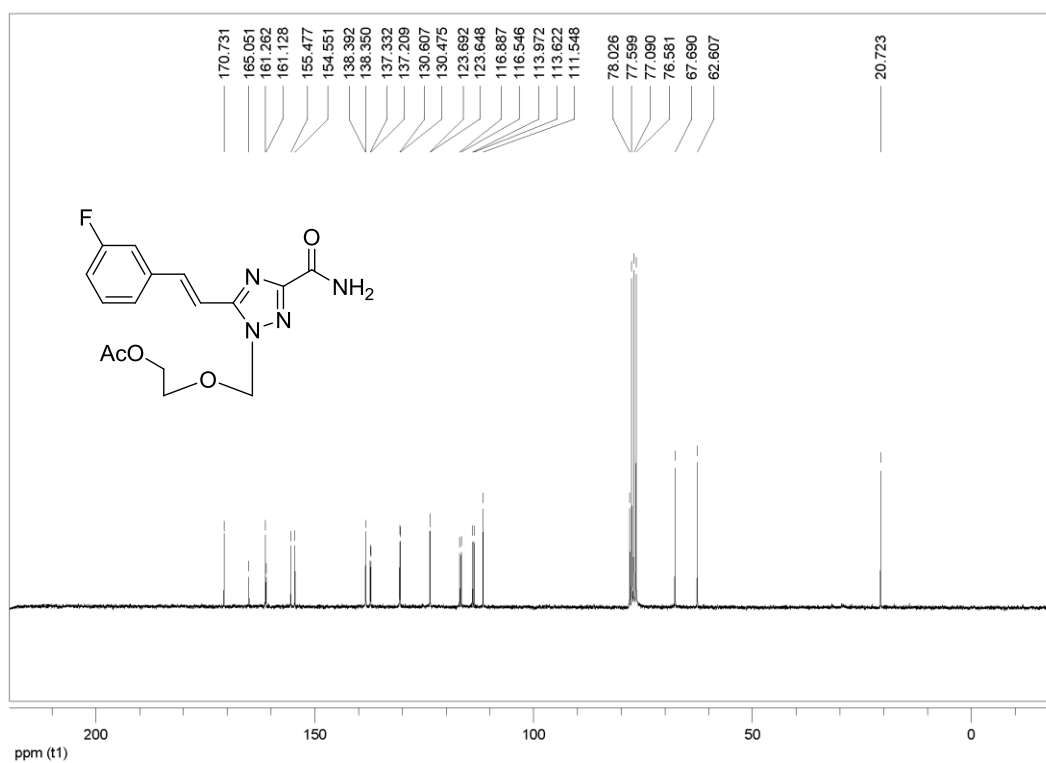

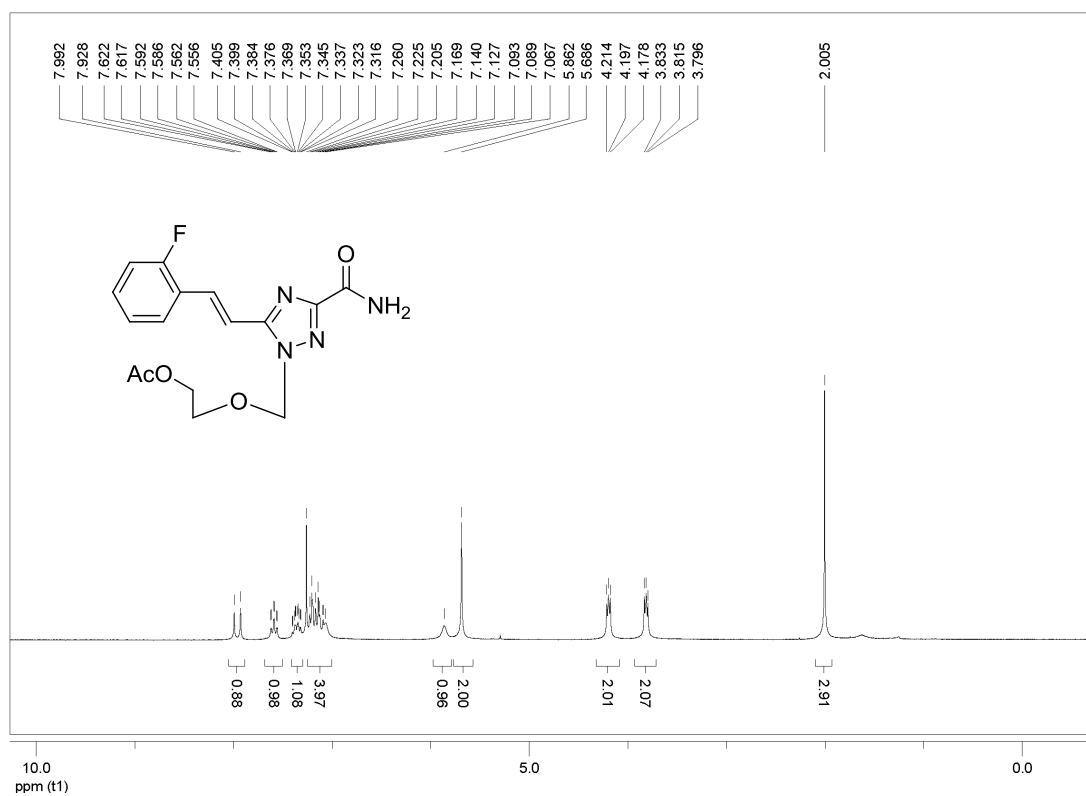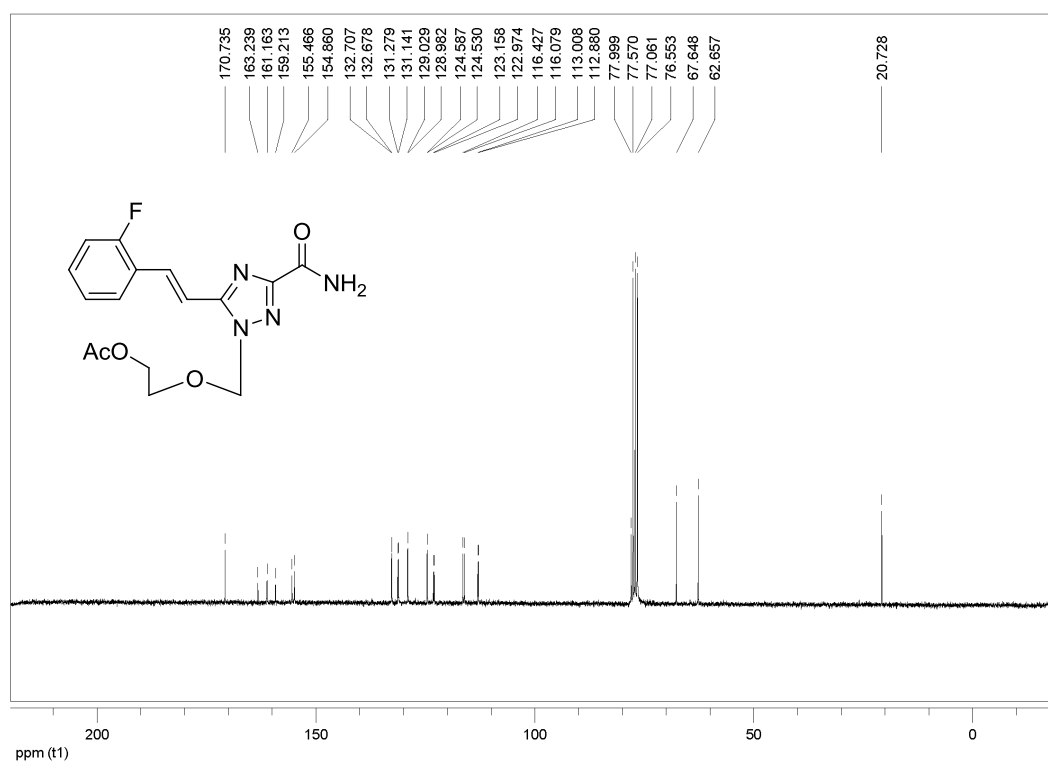

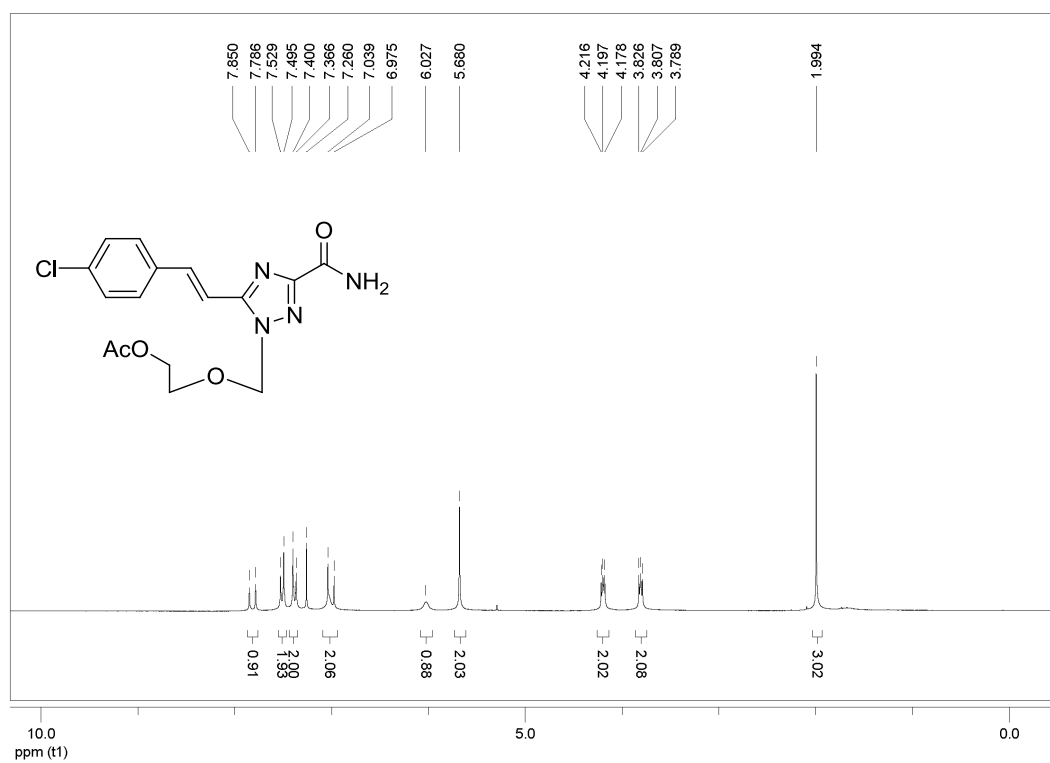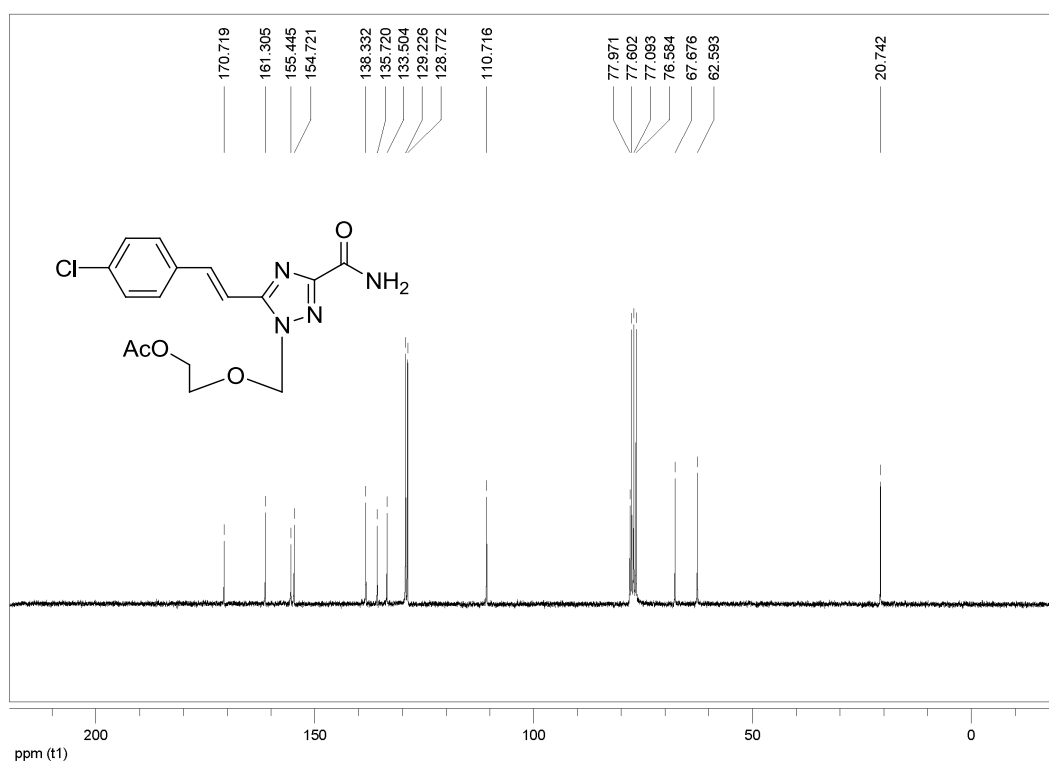



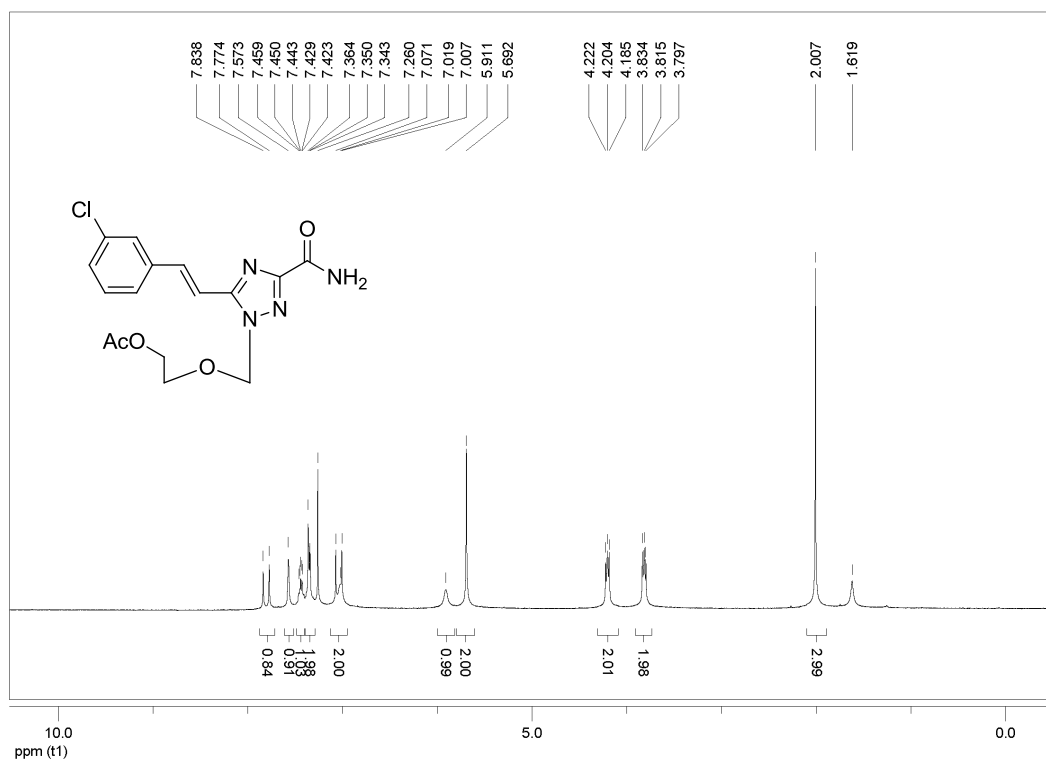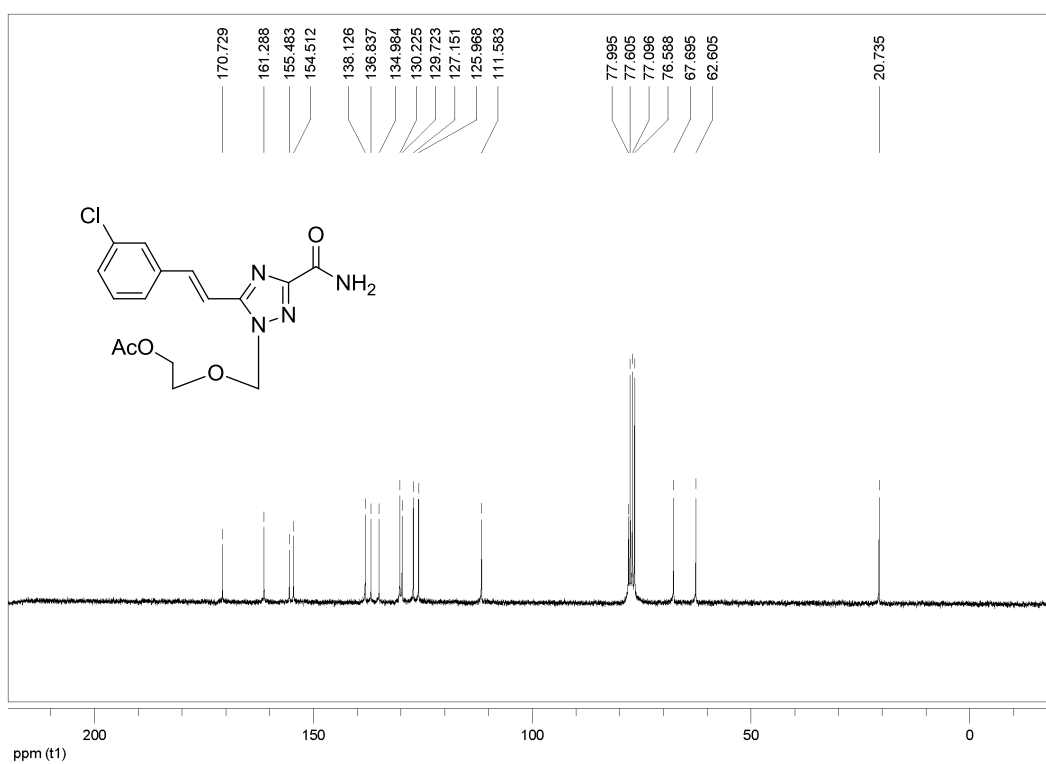

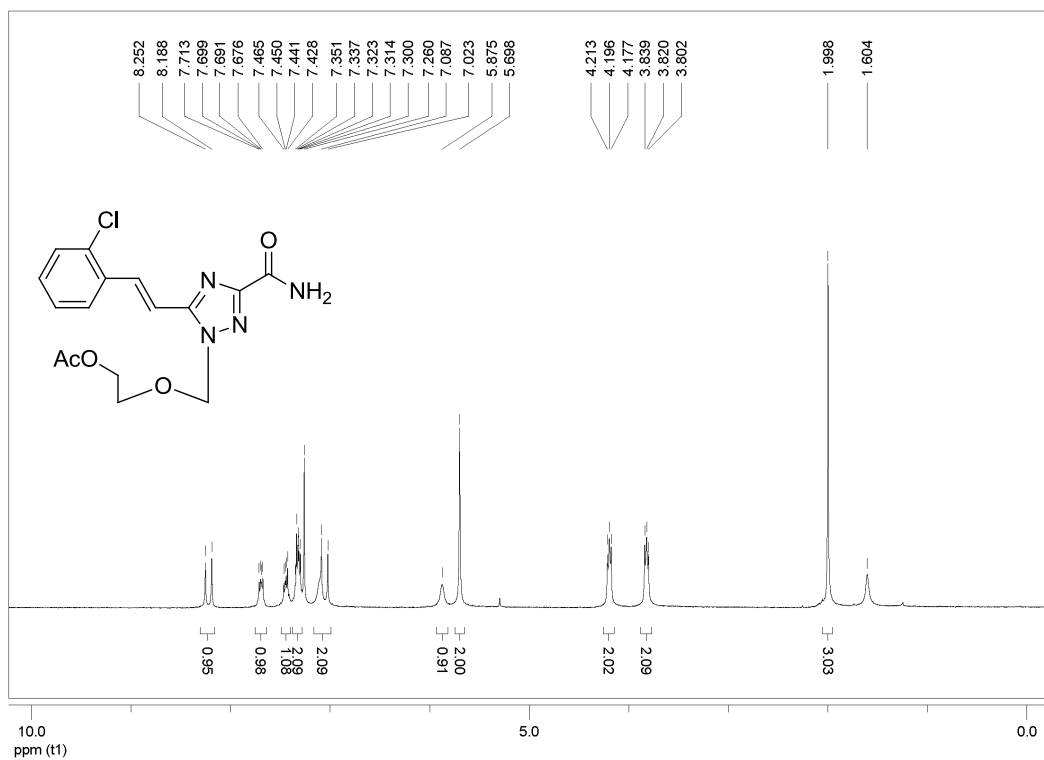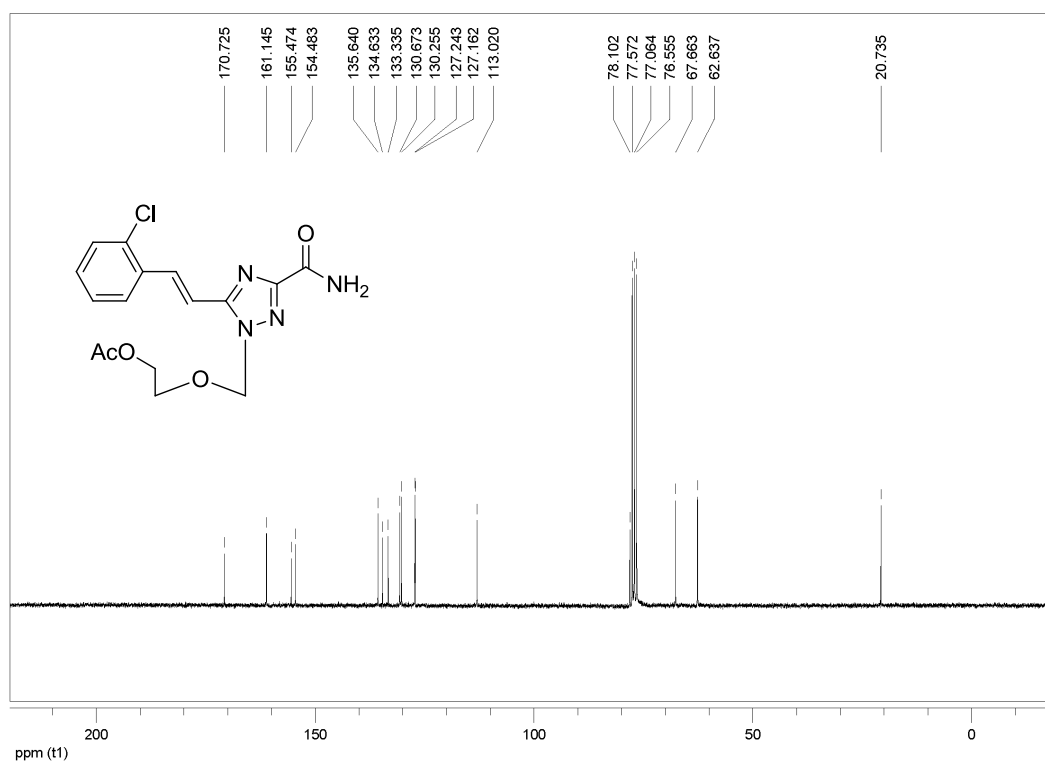

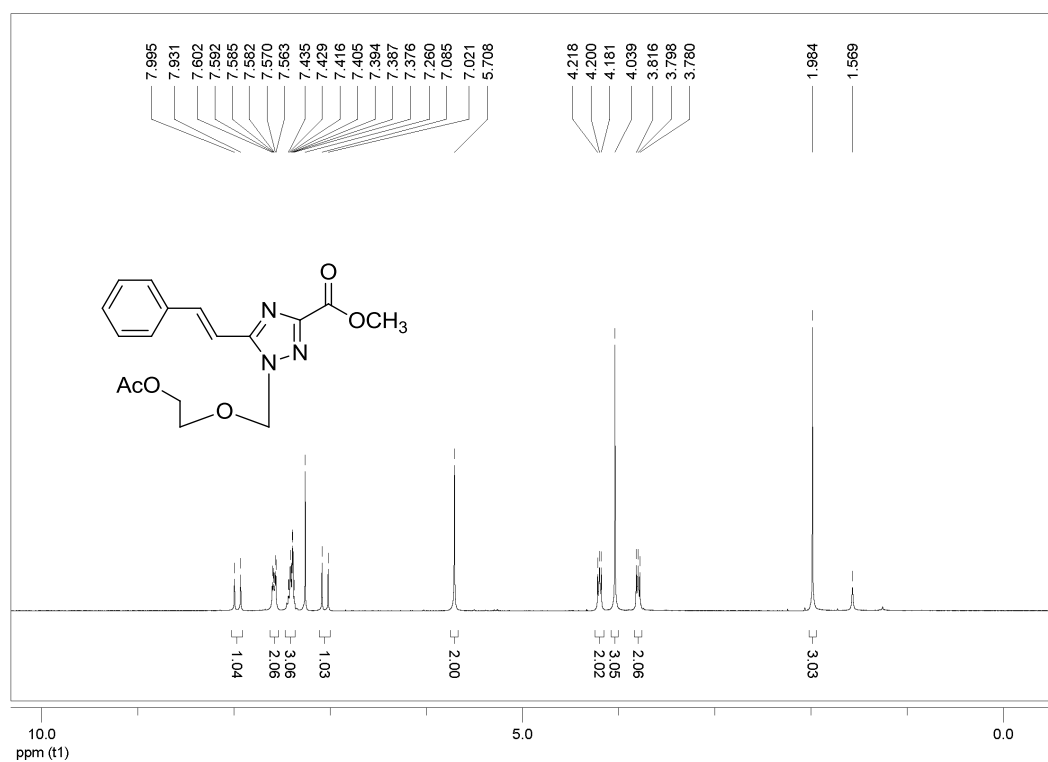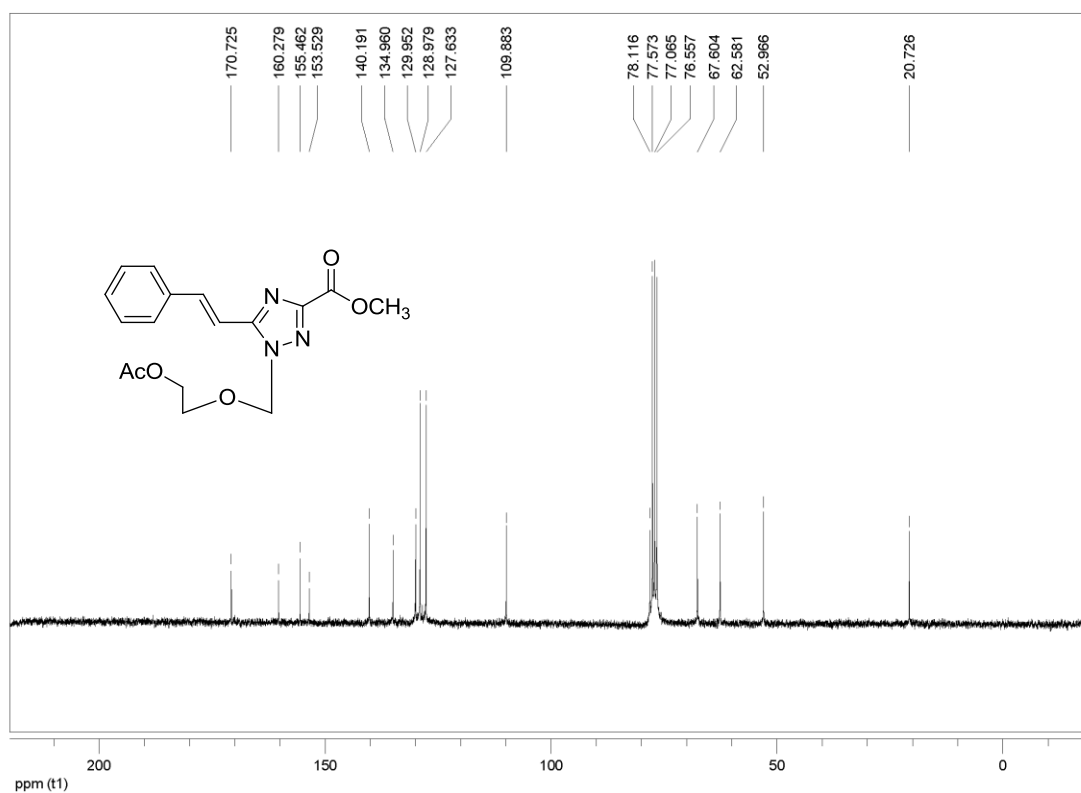

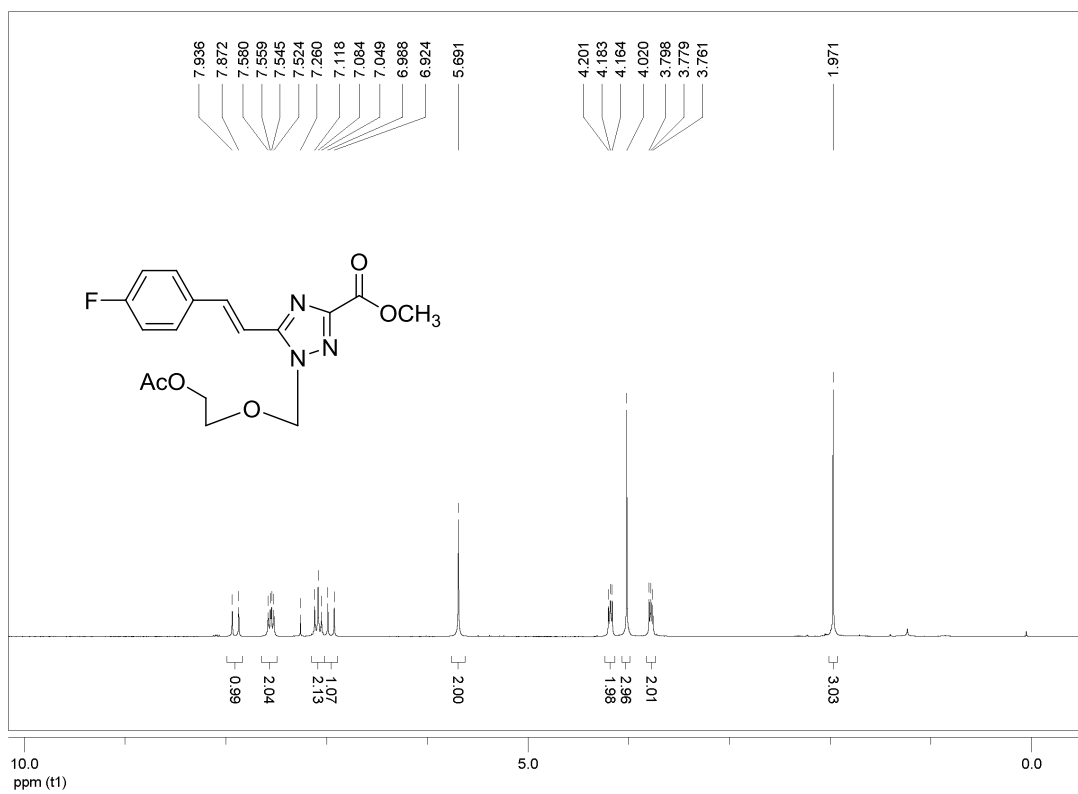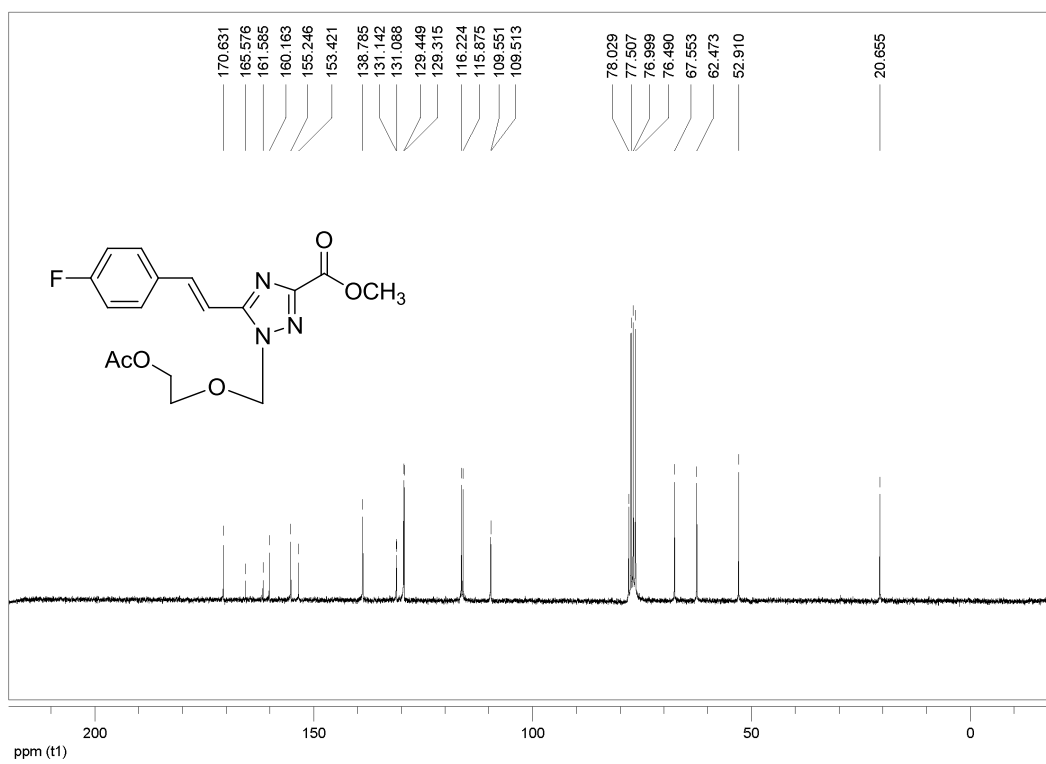

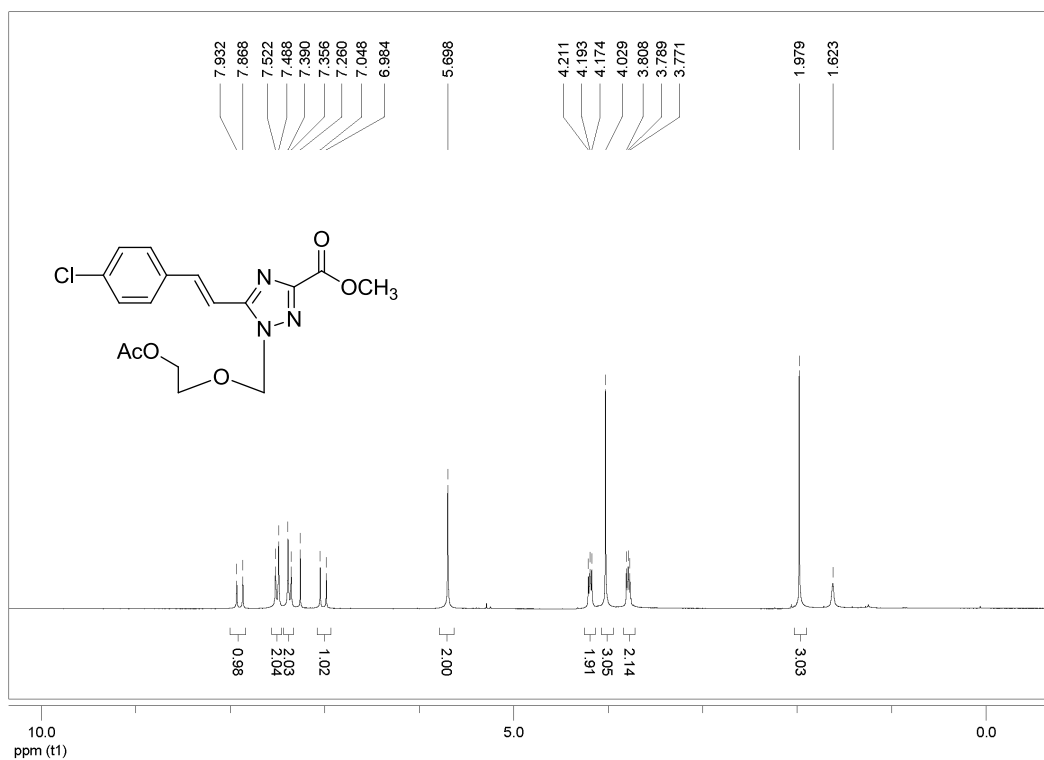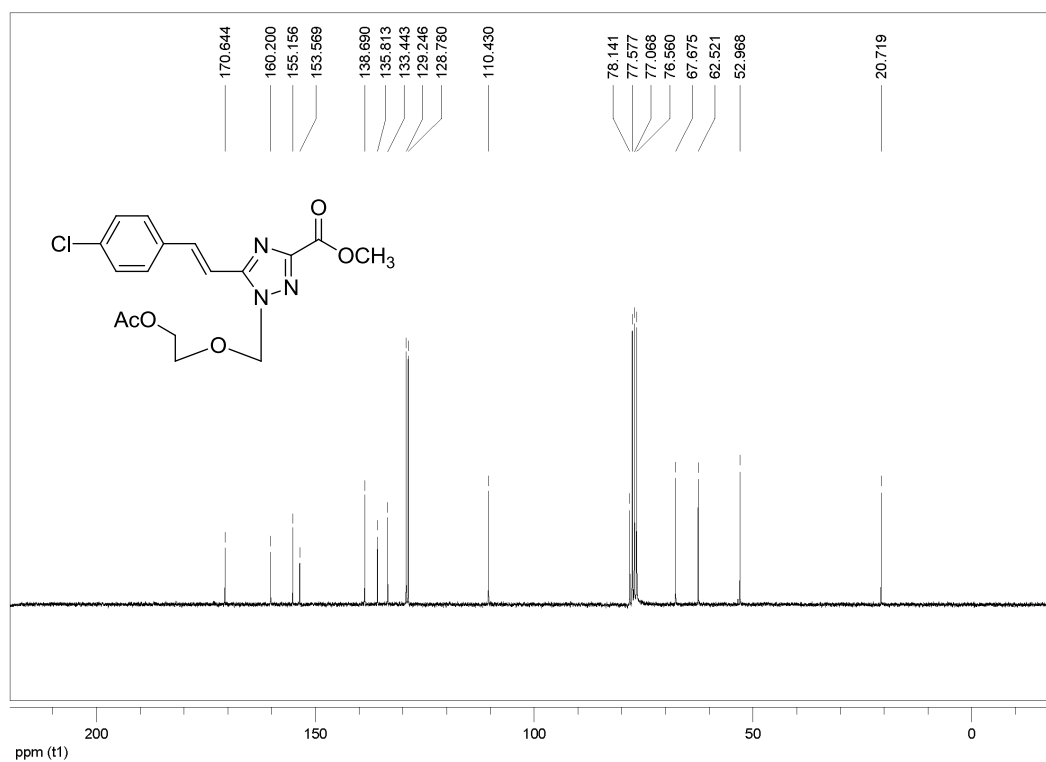

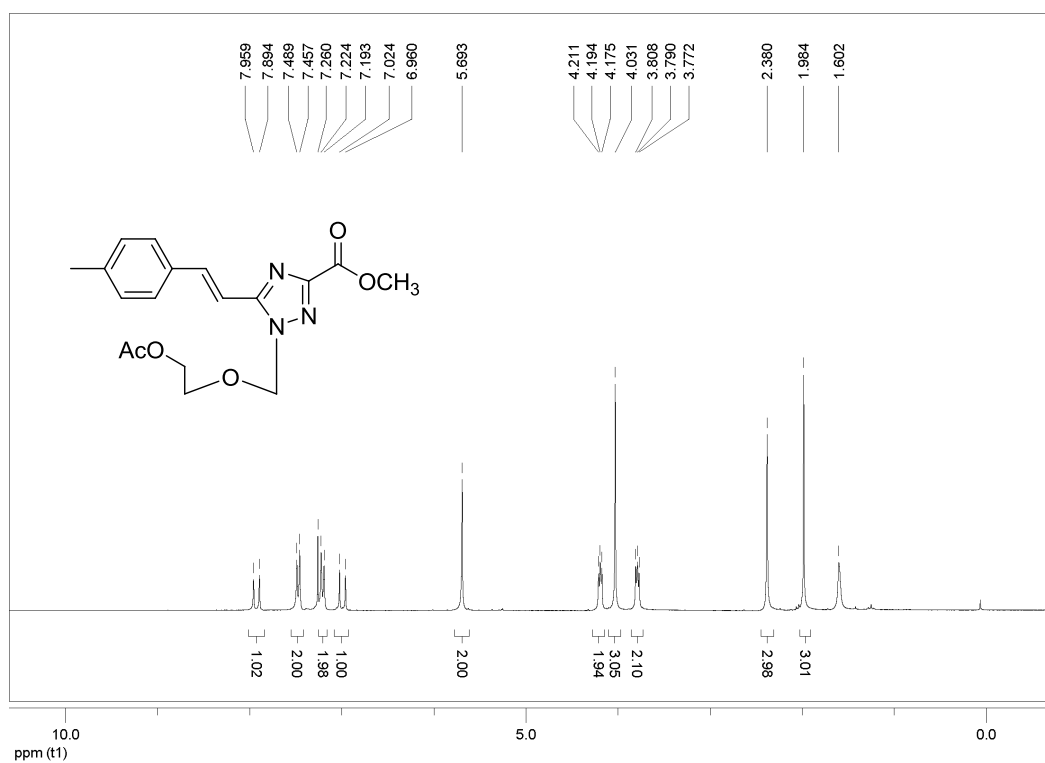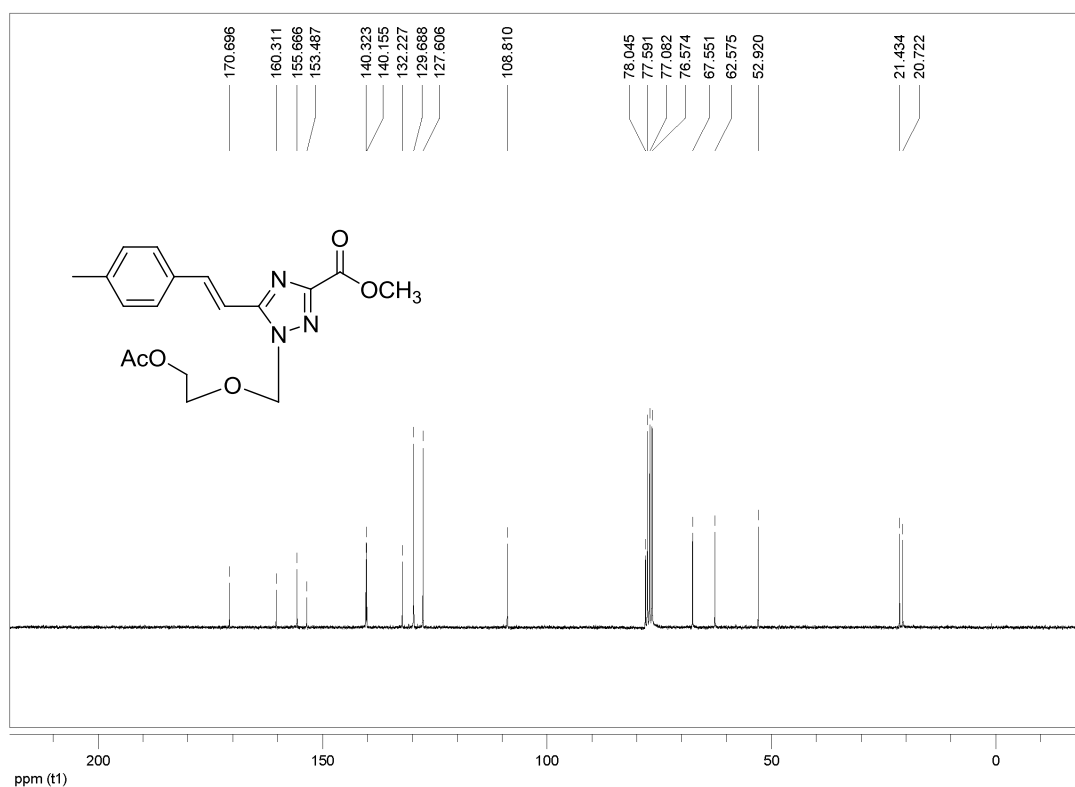

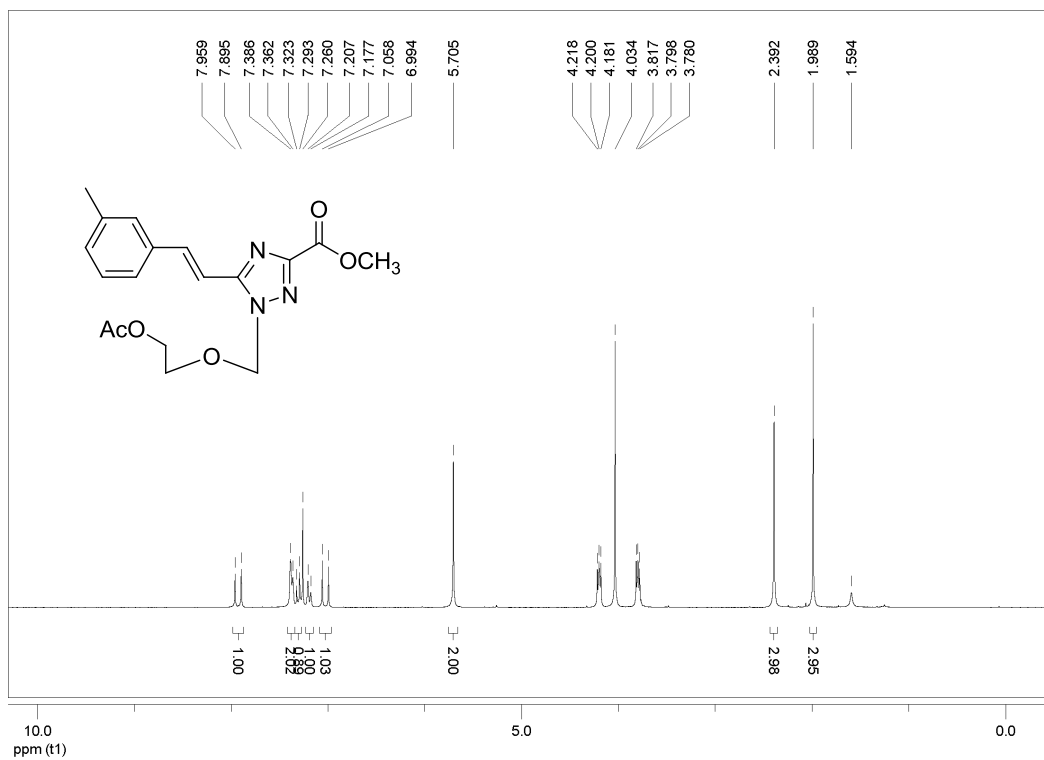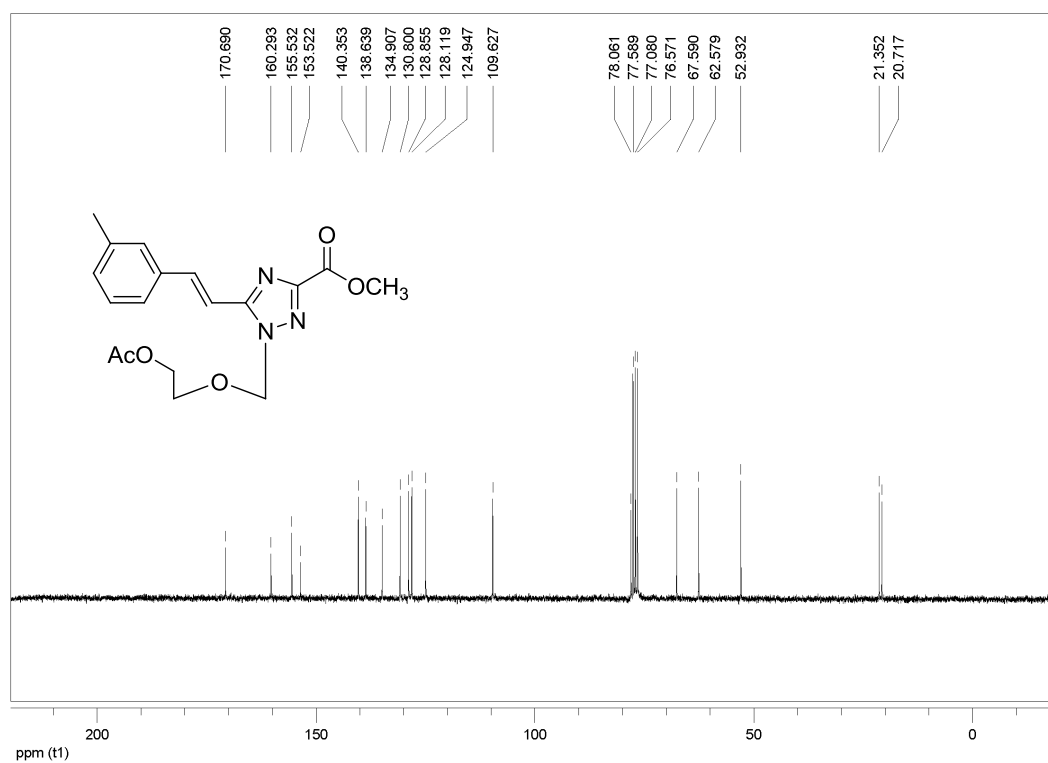

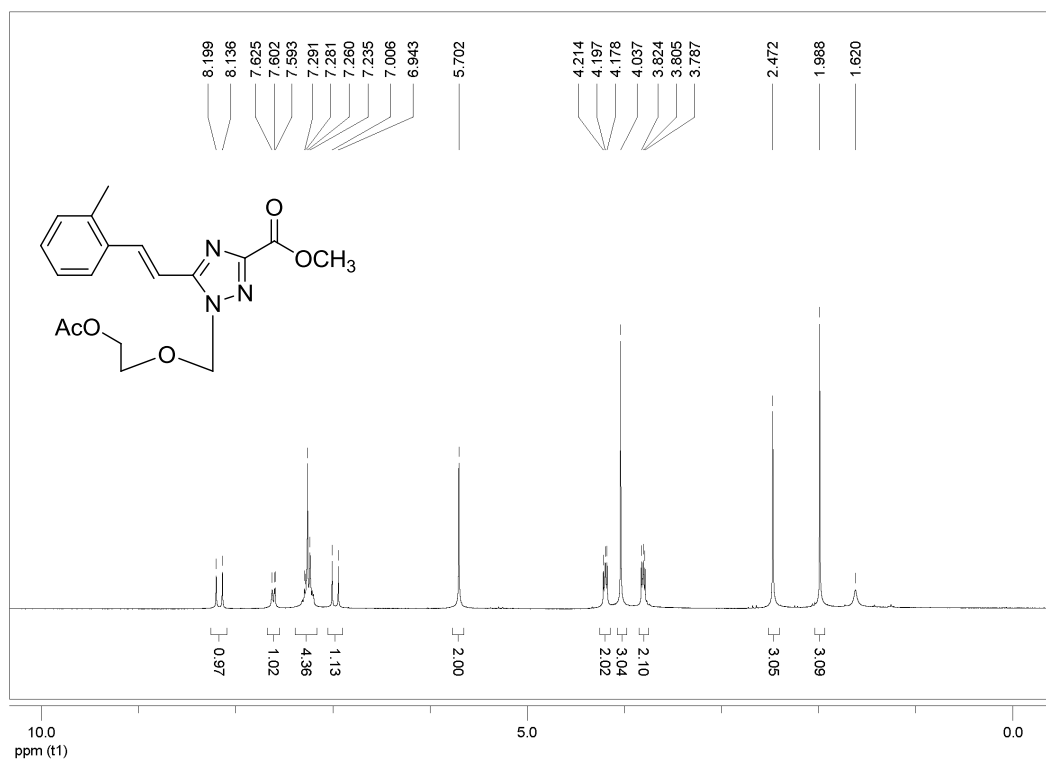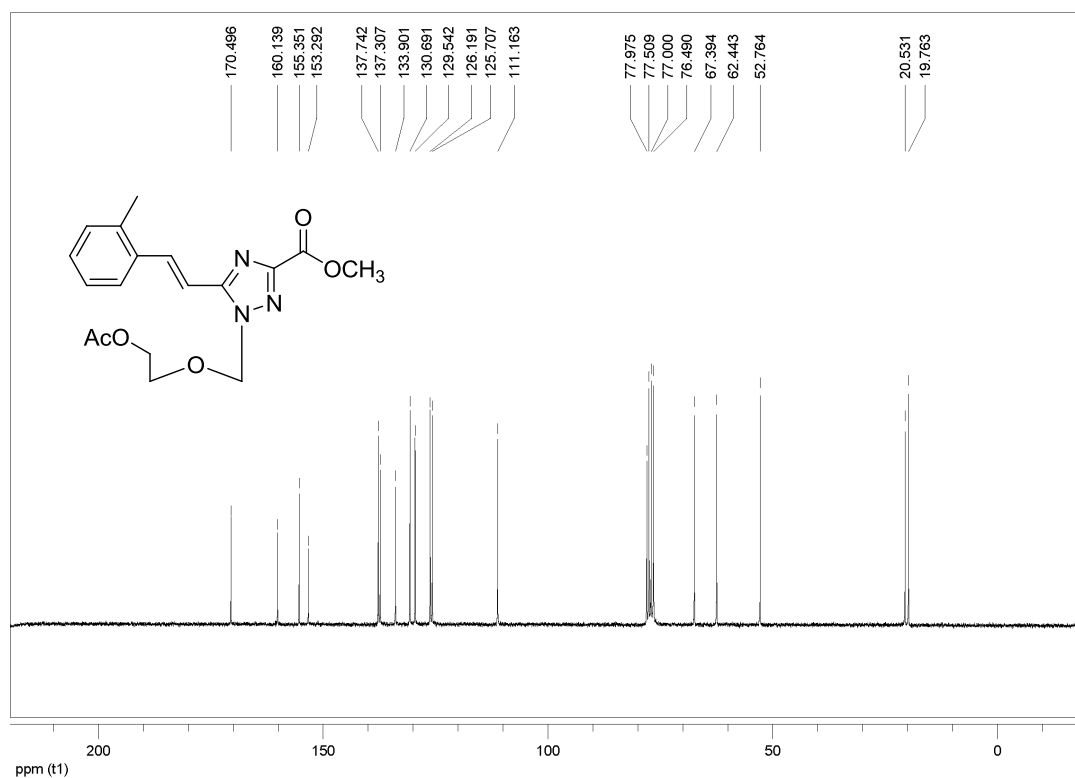



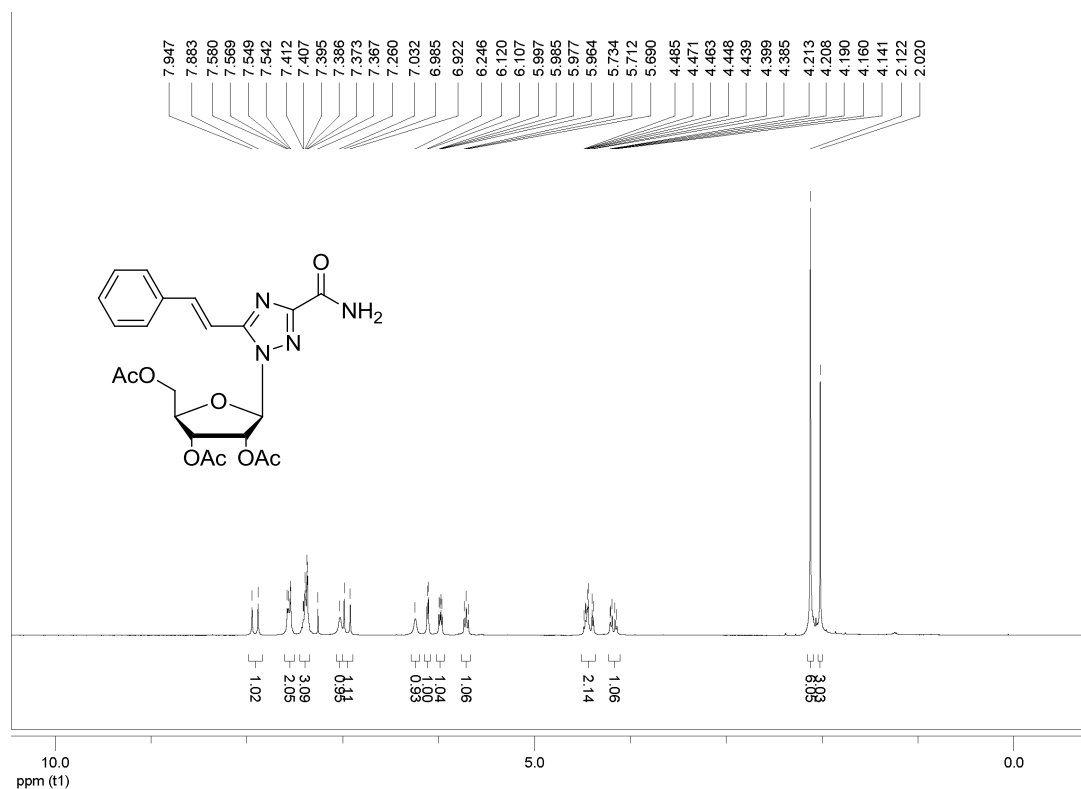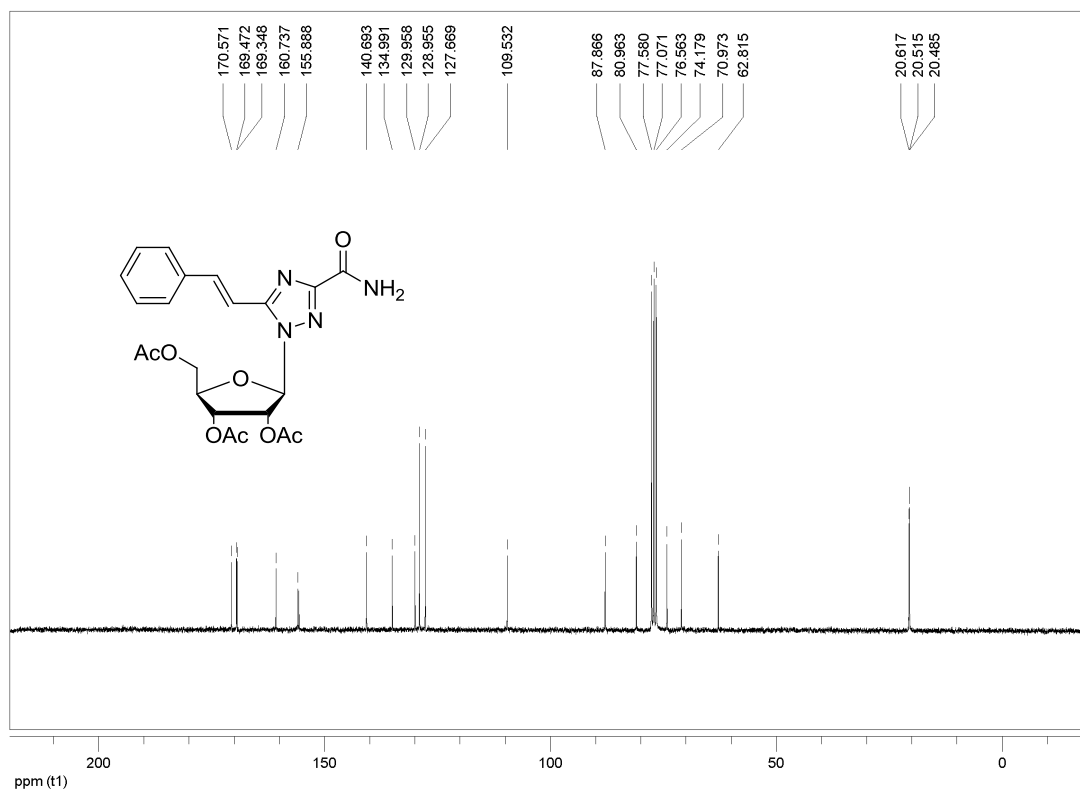

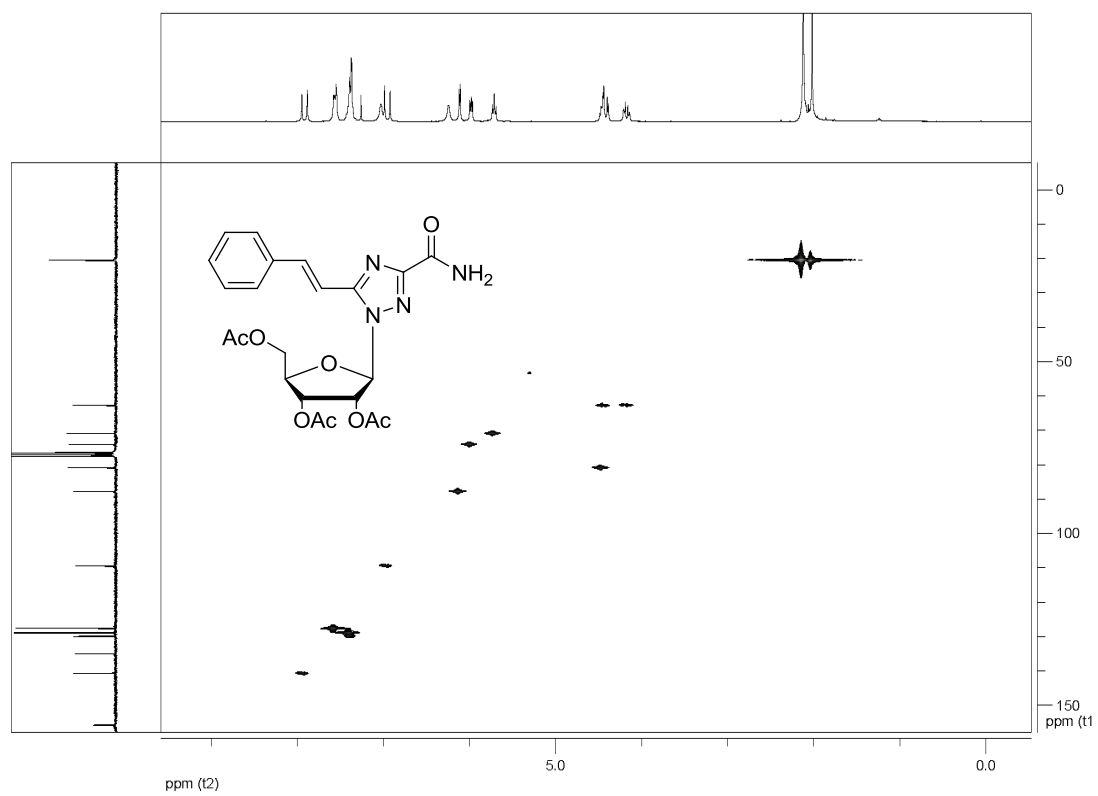

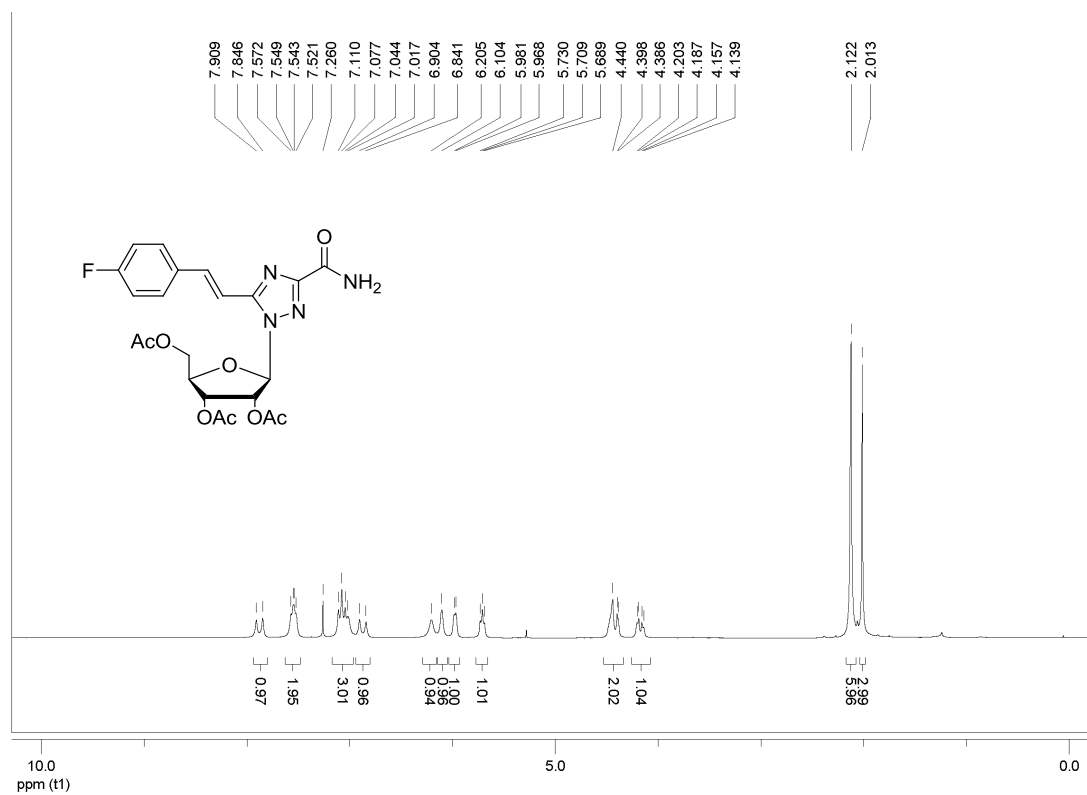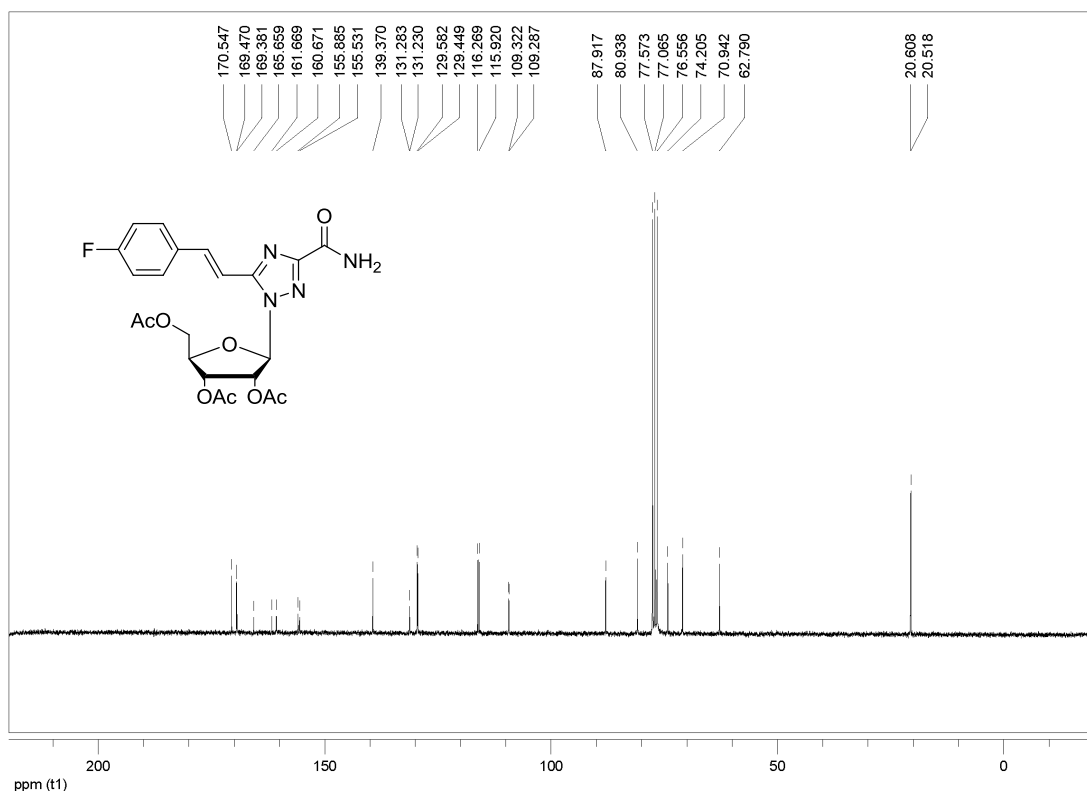

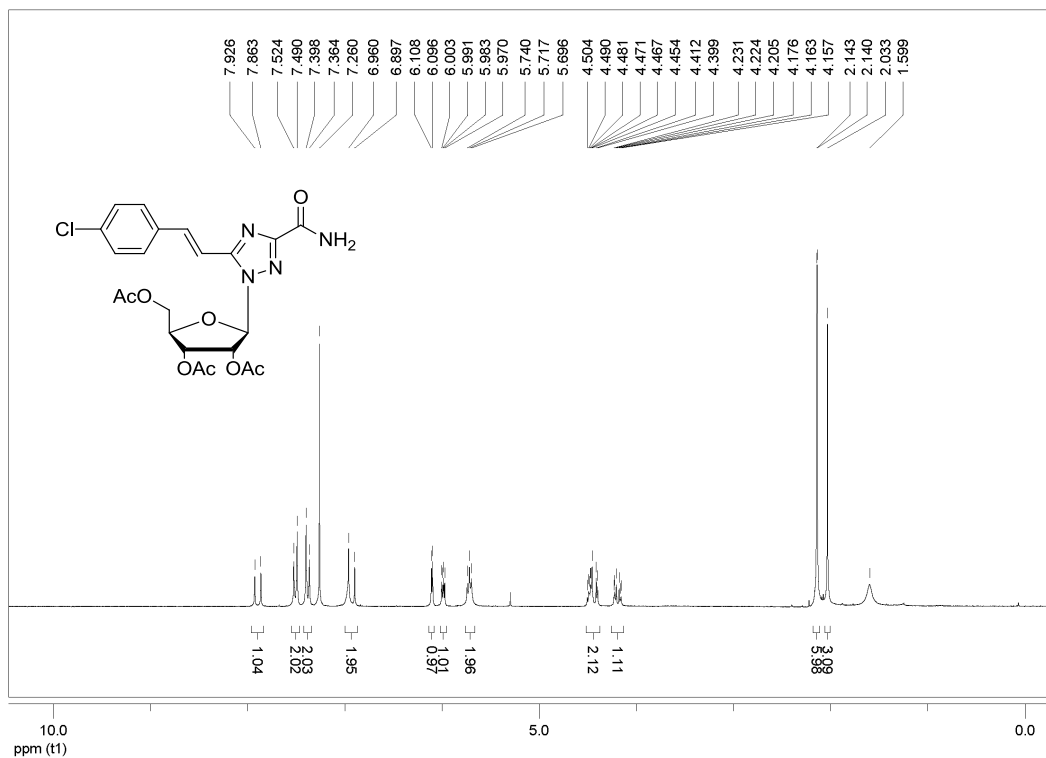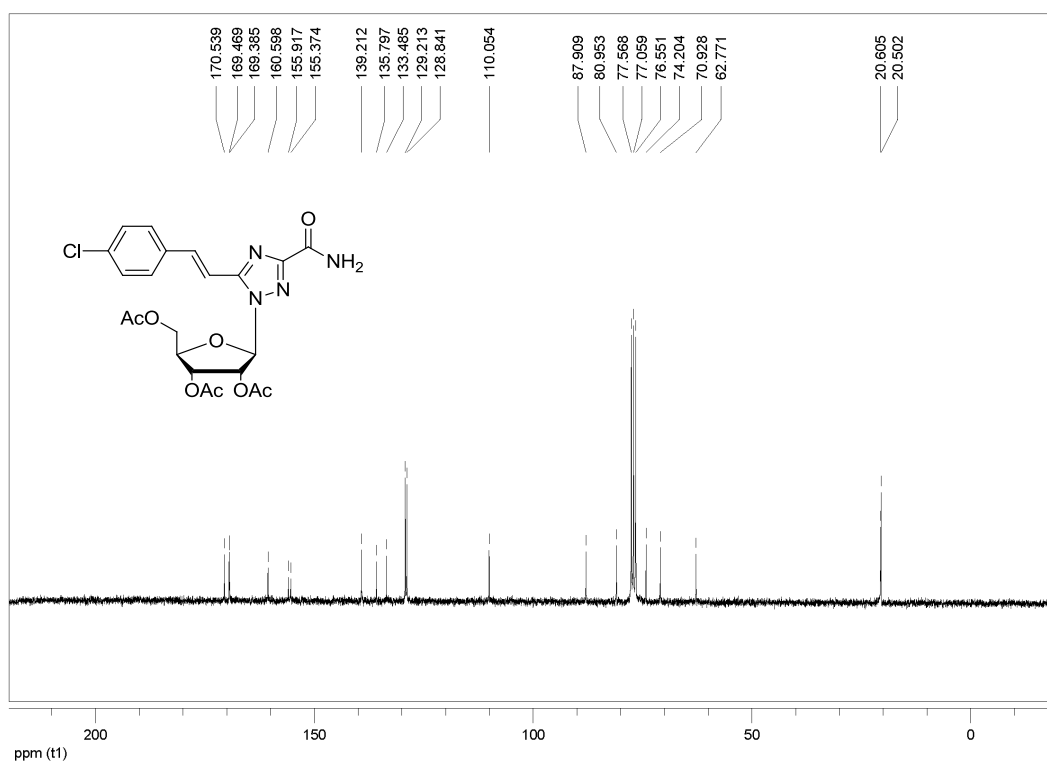

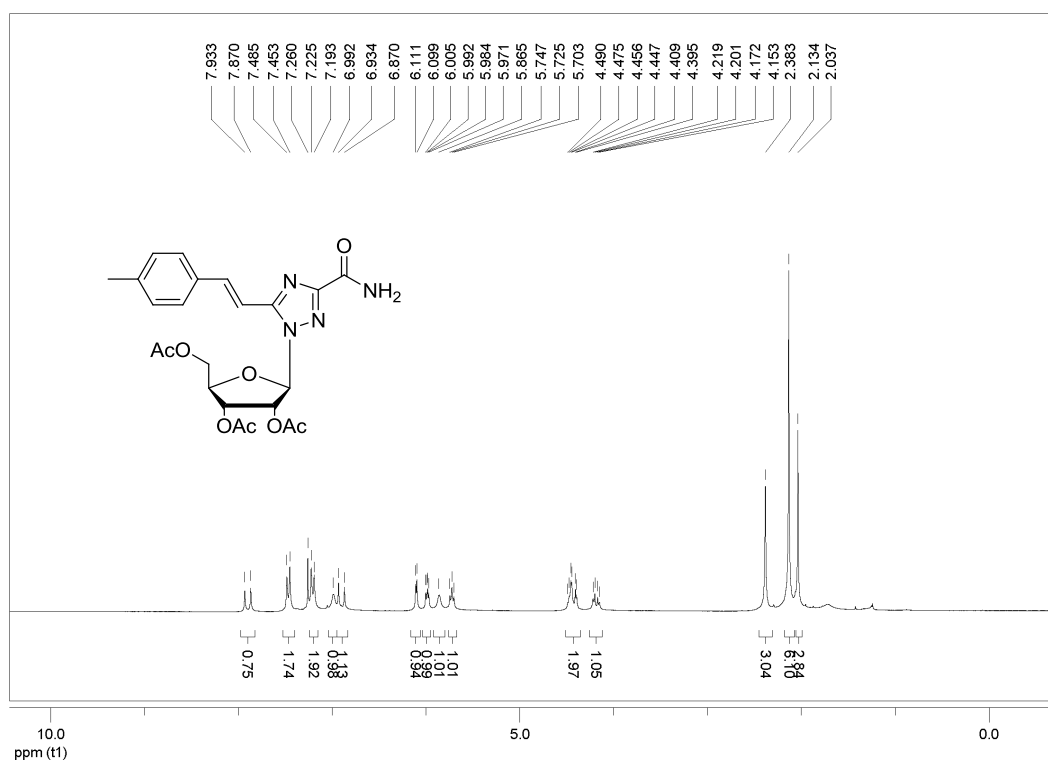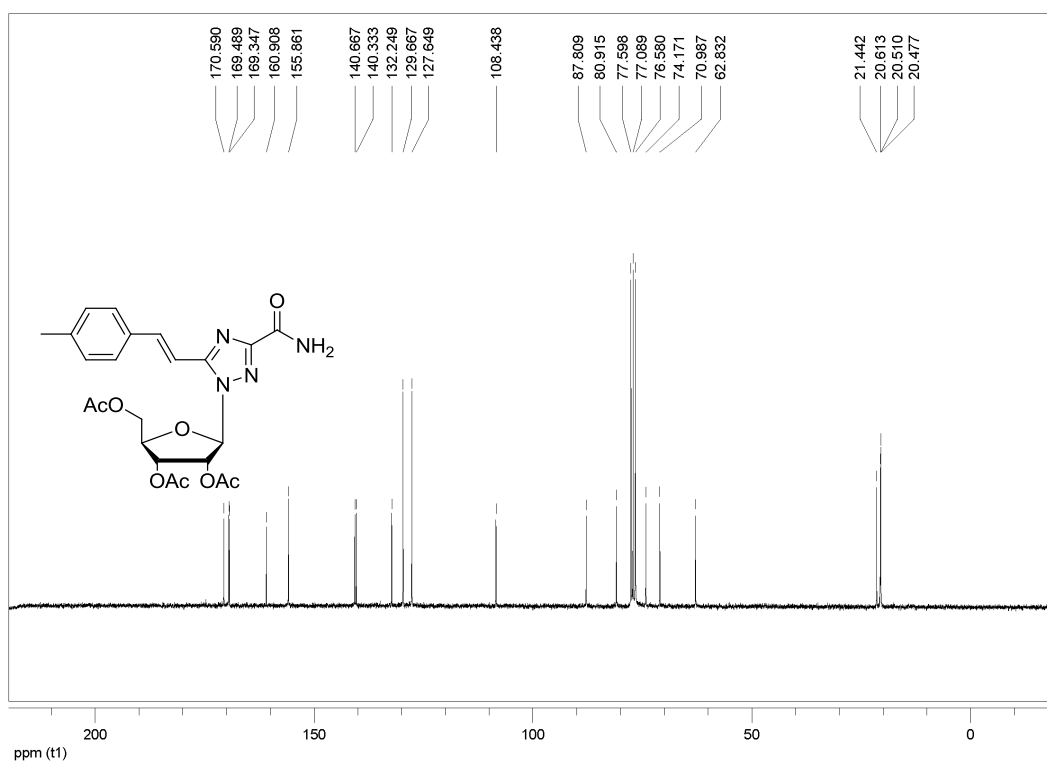

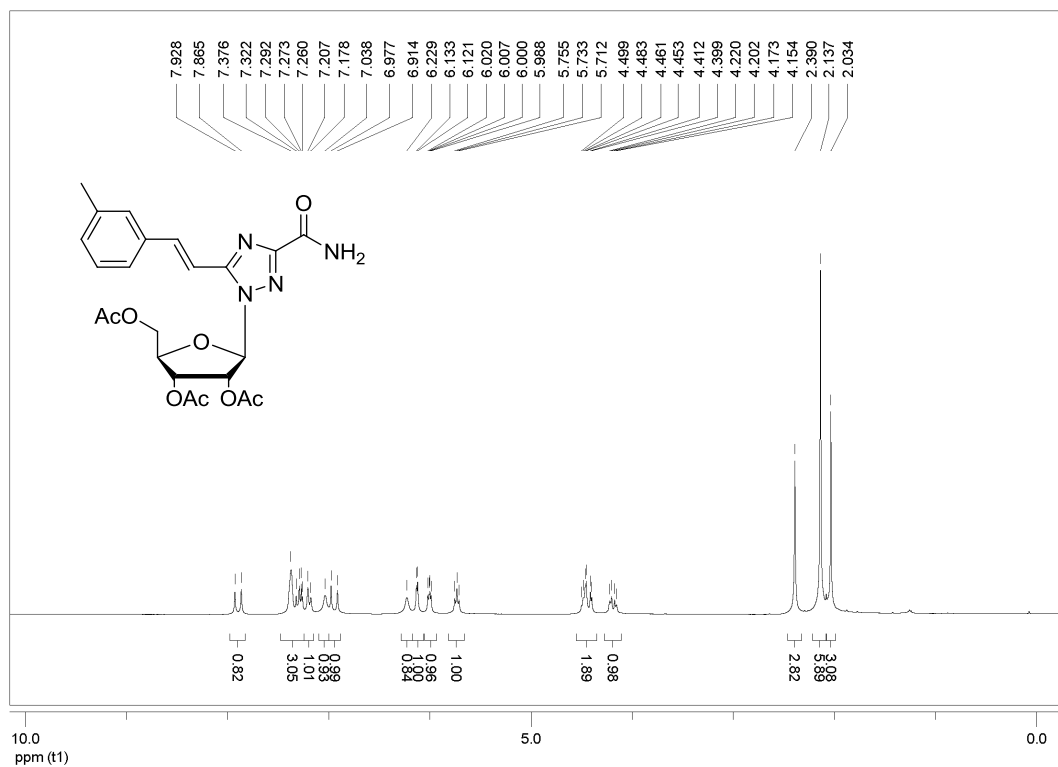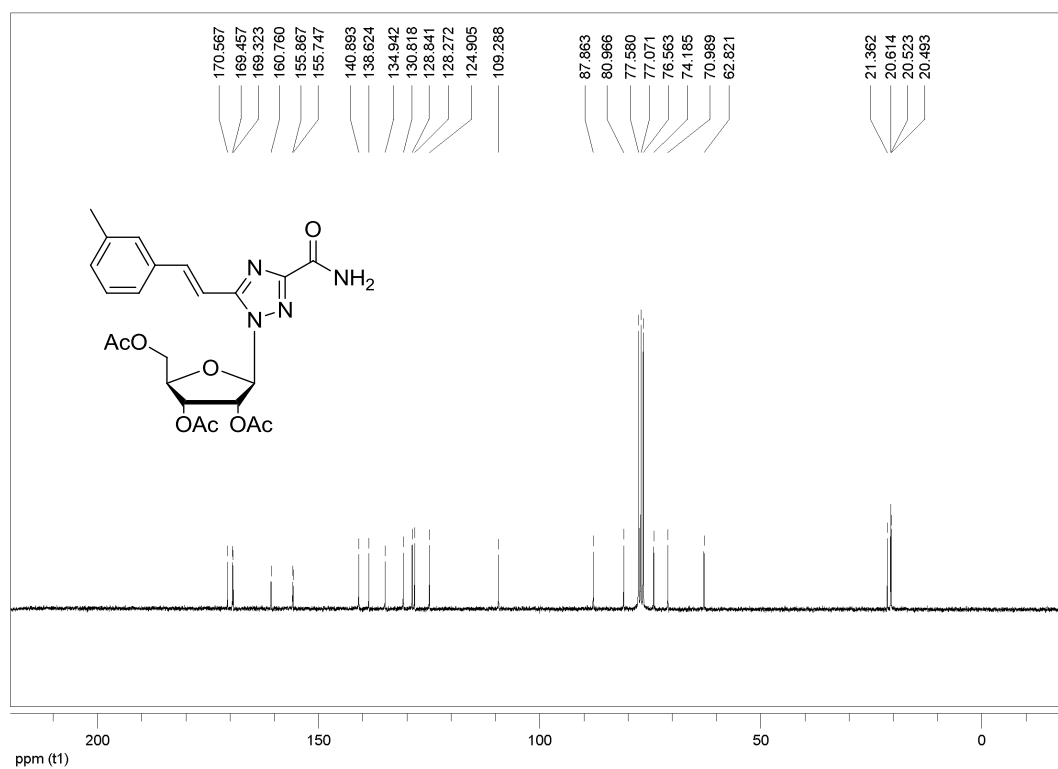

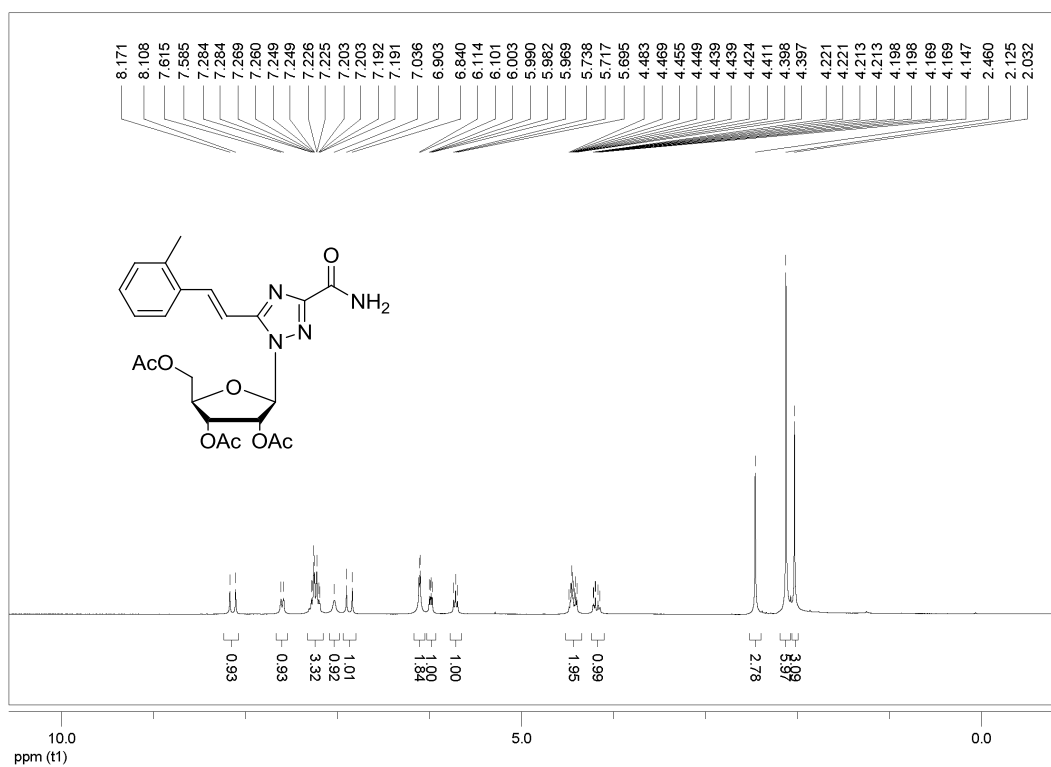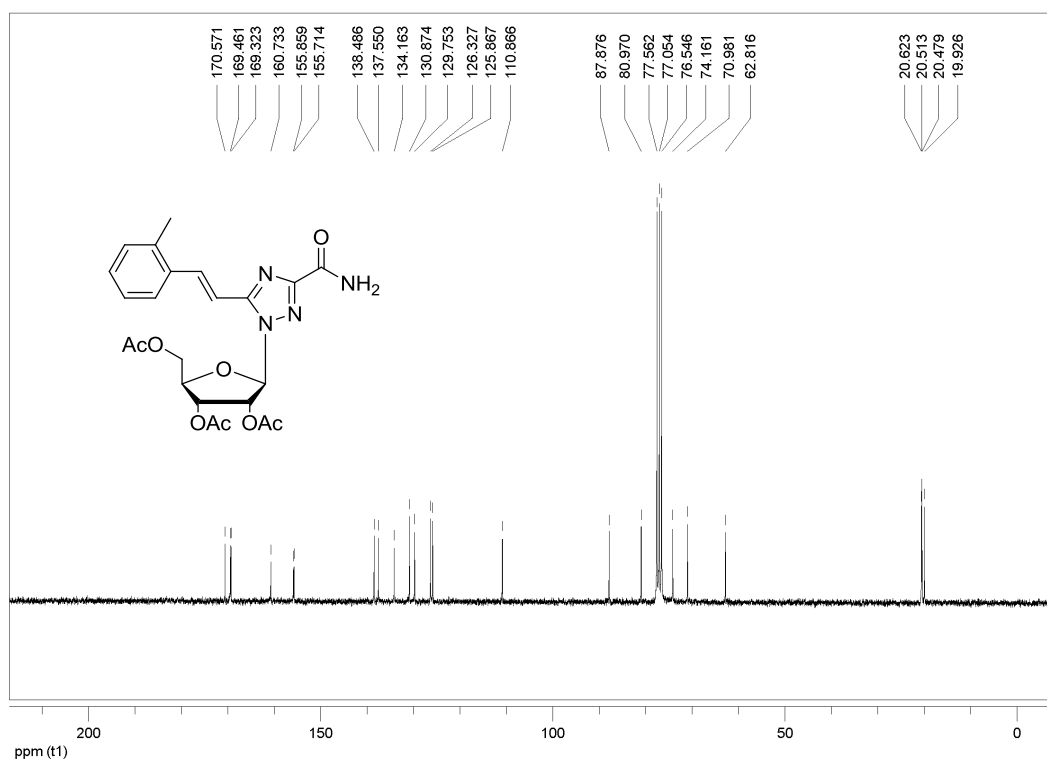

Supplement: c4ob01836b1.pdf [file c4ob01836b1.pdf]
